# Supplementary material for: Health Outcomes, Pathogenesis and Epidemiology of Severe Acute Malnutrition (HOPE-SAM): rationale and methods of a longitudinal observational study
Source: PubMed Central journal article supplement (PMC6361330; doi:10.1136/bmjopen-2018-023077), 2019-02-01
Supplement: bmjopen-2018-023077.draft_revisions.pdf [file bmjopen-2018-023077.draft_revisions.pdf]

# BMJ Open

BMJ Open is committed to open peer review. As part of this commitment we make the peer review history of every article we publish publicly available.

When an article is published we post the peer reviewers' comments and the authors' responses online. We also post the versions of the paper that were used during peer review. These are the versions that the peer review comments apply to.

The versions of the paper that follow are the versions that were submitted during the peer review process. They are not the versions of record or the final published versions. They should not be cited or distributed as the published version of this manuscript.

BMJ Open is an open access journal and the full, final, typeset and author-corrected version of record of the manuscript is available on our site with no access controls, subscription charges or pay-per-view fees (<http://bmjopen.bmj.com>).

If you have any questions on BMJ Open's open peer review process please email [info.bmjopen@bmj.com](mailto:info.bmjopen@bmj.com)

# BMJ Open

## Health Outcomes, Pathogenesis and Epidemiology of Severe Acute Malnutrition (HOPE-SAM): rationale and methods of a longitudinal observational study

|                               |                                                                                                                                                                                                                                                                                                                                                                                                                                                                                                                                                                                                                                                                                                                                                                                                                                                                                                                                                                                                                                                                                                                                                                                                                                                                                                                                                                                                                                                                                                                                                                                                                                                                                                                                                                                                                                                                                                                                                                                                                                                                                                                                                                             |
|-------------------------------|-----------------------------------------------------------------------------------------------------------------------------------------------------------------------------------------------------------------------------------------------------------------------------------------------------------------------------------------------------------------------------------------------------------------------------------------------------------------------------------------------------------------------------------------------------------------------------------------------------------------------------------------------------------------------------------------------------------------------------------------------------------------------------------------------------------------------------------------------------------------------------------------------------------------------------------------------------------------------------------------------------------------------------------------------------------------------------------------------------------------------------------------------------------------------------------------------------------------------------------------------------------------------------------------------------------------------------------------------------------------------------------------------------------------------------------------------------------------------------------------------------------------------------------------------------------------------------------------------------------------------------------------------------------------------------------------------------------------------------------------------------------------------------------------------------------------------------------------------------------------------------------------------------------------------------------------------------------------------------------------------------------------------------------------------------------------------------------------------------------------------------------------------------------------------------|
| Journal:                      | <i>BMJ Open</i>                                                                                                                                                                                                                                                                                                                                                                                                                                                                                                                                                                                                                                                                                                                                                                                                                                                                                                                                                                                                                                                                                                                                                                                                                                                                                                                                                                                                                                                                                                                                                                                                                                                                                                                                                                                                                                                                                                                                                                                                                                                                                                                                                             |
| Manuscript ID                 | bmjopen-2018-023077                                                                                                                                                                                                                                                                                                                                                                                                                                                                                                                                                                                                                                                                                                                                                                                                                                                                                                                                                                                                                                                                                                                                                                                                                                                                                                                                                                                                                                                                                                                                                                                                                                                                                                                                                                                                                                                                                                                                                                                                                                                                                                                                                         |
| Article Type:                 | Protocol                                                                                                                                                                                                                                                                                                                                                                                                                                                                                                                                                                                                                                                                                                                                                                                                                                                                                                                                                                                                                                                                                                                                                                                                                                                                                                                                                                                                                                                                                                                                                                                                                                                                                                                                                                                                                                                                                                                                                                                                                                                                                                                                                                    |
| Date Submitted by the Author: | 21-Mar-2018                                                                                                                                                                                                                                                                                                                                                                                                                                                                                                                                                                                                                                                                                                                                                                                                                                                                                                                                                                                                                                                                                                                                                                                                                                                                                                                                                                                                                                                                                                                                                                                                                                                                                                                                                                                                                                                                                                                                                                                                                                                                                                                                                                 |
| Complete List of Authors:     | <p>Bwakura-Dangarembizi, Mutsa; Paediatrics and Child Health Amadi, Beatrice; 2Tropical Gastroenterology and Nutrition Group, University of Zambia, Lusaka, Zambia</p> <p>Bourke, Claire ; Blizard Institute, Queen Mary University of London, UK</p> <p>Robertson, Ruairi; Blizard Institute, Queen Mary University of London, UK</p> <p>Mwapenya, Benjamin; Zvitambo Institute for Maternal and Child Health Research, Harare, Zimbabwe</p> <p>Chandwe, Kanta; Tropical Gastroenterology and Nutrition Group, University of Zambia, Lusaka, Zambia</p> <p>Kapoma, Chanda; Tropical Gastroenterology and Nutrition Group, University of Zambia, Lusaka, Zambia, Paediatrics; Livingstone Central Hospital, Paediatrics</p> <p>Chifunda, Kapula; Tropical Gastroenterology and Nutrition Group, University of Zambia, Lusaka, Zambia, paediatrics and child health</p> <p>Majo, Florence; Zvitambo Institute for Maternal and Child Health Research, Harare, Zimbabwe</p> <p>Ngosa, Deophine; Tropical Gastroenterology and Nutrition Group, University of Zambia, Lusaka, Zambia</p> <p>Chakara, Pamela; Zvitambo Institute for Maternal and Child Health Research, Harare, Zimbabwe</p> <p>Chulu, Nivea; 2Tropical Gastroenterology and Nutrition Group, University of Zambia, Lusaka, Zambia</p> <p>Masimba, Faithfull; Zvitambo Institute for Maternal and Child Health Research, Harare, Zimbabwe</p> <p>Mapurisa, Idah; Zvitambo Institute for Maternal and Child Health Research, Harare, Zimbabwe</p> <p>Besa, Ellen; Zvitambo Institute for Maternal and Child Health Research, Harare, Zimbabwe</p> <p>Mutasa, Kuda; Zvitambo Institute for Maternal and Child Health Research, Harare, Zimbabwe</p> <p>Mwakamui, Simutanyi; 2Tropical Gastroenterology and Nutrition Group, University of Zambia, Lusaka, Zambia</p> <p>Runodamoto, Thompson ; Zvitambo Institute for Maternal and Child Health Research, Harare, Zimbabwe</p> <p>Humphrey, Jean; Zvitambo Institute for Maternal and Child Health Research, Harare, Zimbabwe</p> <p>Ntozini, Robert; Zvitambo Institute, Biostatistics &amp; IT</p> <p>Wells, Jonathan C. K.; Royal Cornwall Hosp NHS Trust</p> |

1  
2  
3  
4  
5  
6  
7  
8  
9  
10  
11  
12  
13  
14  
15  
16  
17  
18  
19  
20  
21  
22  
23  
24  
25  
26  
27  
28  
29  
30  
31  
32  
33  
34  
35  
36  
37  
38  
39  
40  
41  
42  
43  
44  
45  
46  
47  
48  
49  
50  
51  
52  
53  
54  
55  
56  
57  
58  
59  
60

|           |                                                                                                                                                                                                                                                                                                                               |
|-----------|-------------------------------------------------------------------------------------------------------------------------------------------------------------------------------------------------------------------------------------------------------------------------------------------------------------------------------|
|           | Manges, Ameen; University of British Columbia<br>Swann, Jon; Imperial College London<br>Walker, Sarah; MRC Clinical Trials Unit at UCL<br>Nathoo, Kusum; University of Zimbabwe, College of Health Sciences<br>Kelly, Paul; Barts and The London School of Medicine<br>Prendergast, Andrew ; Queen Mary University of London, |
| Keywords: | Malnutrition, HIV, Africa, mortality, microbiota, enteropathy                                                                                                                                                                                                                                                                 |
|           |                                                                                                                                                                                                                                                                                                                               |

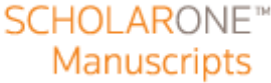

1  
2  
3 **Health Outcomes, Pathogenesis and Epidemiology of Severe Acute**  
4 **Malnutrition (HOPE-SAM): rationale and methods of a longitudinal**  
5 **observational study**  
6  
7  
8  
9

10 Mutsa Bwakura-Dangarembizi<sup>1</sup>, Beatrice Amadi<sup>2</sup>, Claire D Bourke<sup>3</sup>, Ruairi C  
11 Robertson<sup>3</sup>, Benjamin Mwapenya<sup>4</sup>, Kanta Chandwe<sup>2</sup>, Chanda Kapoma<sup>2</sup>, Kapula  
12 Chifunda<sup>2</sup>, Florence Majo<sup>4</sup>, Deophine Ngosa<sup>2</sup>, Pamela Chakara<sup>4</sup>, Nivea Chulu<sup>2</sup>,  
13 Faithful Masimba<sup>4</sup>, Idah Mapurisa<sup>4</sup>, Ellen Besa<sup>2</sup>, Kuda Mutasa<sup>4</sup>, Simutanyi  
14 Mwakamui<sup>2</sup>, Thompson Runodamoto<sup>4</sup>, Jean H Humphrey<sup>4</sup>, Robert Ntozini<sup>4</sup>, Jonathan  
15 Wells<sup>5</sup>, Ameer R Manges<sup>6</sup>, Jonathan Swann<sup>7</sup>, A Sarah Walker<sup>8</sup>, Kusum J Nathoo<sup>1</sup>,  
16 Paul Kelly<sup>2,3</sup>, Andrew J Prendergast<sup>3,4</sup> for the HOPE-SAM Study Team<sup>9</sup>.  
17  
18  
19  
20  
21  
22  
23  
24  
25

26 <sup>1</sup>Department of Paediatrics and Child Health, University of Zimbabwe College of  
27 Health Sciences, Harare, Zimbabwe  
28  
29

30 <sup>2</sup>Tropical Gastroenterology and Nutrition Group, University of Zambia, Lusaka,  
31 Zambia  
32  
33

34 <sup>3</sup>Blizard Institute, Queen Mary University of London, UK  
35

36 <sup>4</sup>Zvitambo Institute for Maternal and Child Health Research, Harare, Zimbabwe  
37

38 <sup>5</sup>UCL Great Ormond Street Institute of Child Health, London, UK  
39

40 <sup>6</sup>University of British Columbia, Vancouver, Canada  
41

42 <sup>7</sup>Imperial College London, UK  
43

44 <sup>8</sup>MRC Clinical Trials Unit at UCL, London, UK  
45  
46  
47

48 <sup>9</sup>Other members of the HOPE-SAM study team are listed in the Acknowledgements  
49 section.  
50  
51  
52  
53

54 **Corresponding author:** Dr Mutsa Bwakura-Dangarembizi, Senior Lecturer,  
55 Department of Paediatrics and Child Health, University of Zimbabwe College of  
56  
57  
58  
59  
60

1  
2  
3 Health Sciences, Box A178, Avondale, Harare, Zimbabwe. Email:

4 [mbwakura@medsch.uz.ac.zw](mailto:mbwakura@medsch.uz.ac.zw)

5  
6  
7 Tel +263 772 601 735. Fax +263 4 700 877.  
8  
9  
10  
11

12  
13 Word count 5926

14  
15 Abstract 261

16  
17  
18 Key words: Malnutrition, HIV, Africa, mortality, microbiota, enteropathy, immunology  
19  
20  
21  
22  
23  
24  
25  
26  
27  
28  
29  
30  
31  
32  
33  
34  
35  
36  
37  
38  
39  
40  
41  
42  
43  
44  
45  
46  
47  
48  
49  
50  
51  
52  
53  
54  
55  
56  
57  
58  
59  
60

## ABSTRACT

### Introduction

Mortality among children hospitalised for complicated severe acute malnutrition (SAM) remains high despite the implementation of WHO guidelines, particularly in settings of high HIV prevalence. Children continue to be at high risk of morbidity, mortality and relapse after discharge from hospital although long-term outcomes are not well documented. Better understanding the pathogenesis of SAM and the factors associated with poor outcomes may inform new therapeutic interventions.

### Methods and analysis

The Health Outcomes, Pathogenesis and Epidemiology of Severe Acute Malnutrition (HOPE-SAM) study is a longitudinal observational cohort that aims to evaluate the short- and long-term clinical outcomes of HIV-infected and HIV-uninfected children with complicated SAM, and to identify the risk factors at admission and discharge from hospital that independently predict poor outcomes. Children aged 0-59mo hospitalised for SAM are being enrolled at three tertiary hospitals in Harare, Zimbabwe, and Lusaka, Zambia. Longitudinal mortality, morbidity and nutritional data are being collected at admission, discharge and for 48 weeks post-discharge. Nested laboratory substudies are exploring the role of enteropathy, gut microbiota, metabolomics and cellular immune function in the pathogenesis of SAM using stool, urine and blood collected from participants.

### Ethics and dissemination

The study is approved by the local and international institutional review boards in the participating countries (the Joint Research Ethics Committee of the University of Zimbabwe, Medical Research Council of Zimbabwe and University of Zambia Biomedical Research Ethics Committee) and the study sponsor (Queen Mary University of London). Caregivers provide written informed consent for each

1  
2  
3 participant. Findings will be disseminated through peer-reviewed journals,  
4 conference presentations and to caregivers at face-to-face meetings.  
5  
6  
7

## 8 **Strengths and limitations of this study**

### 9 **Strengths:**

- 10 • The primary strength of this study is the rigorous collection of longitudinal  
11 data on morbidity, mortality and nutritional status during inpatient care and for  
12 48 weeks after initial admission for SAM.  
13
- 14 • Laboratory sub-studies investigating enteropathy, microbiota, metabolomics  
15 and immune cell function provide a unique opportunity to understand which  
16 pathogenic pathways contribute to SAM and whether these processes  
17 normalise with nutritional rehabilitation, capitalising on a well-characterised  
18 cohort with appropriate controls.
- 19 • This study builds on existing studies of SAM and HIV-SAM prior to the  
20 availability of antiretroviral therapy (ART) and will provide the first assessment  
21 of longitudinal clinical outcomes in the current ART era.  
22  
23  
24  
25  
26  
27  
28  
29  
30  
31  
32  
33  
34  
35  
36

### 37 **Potential limitations:**

- 38 • High loss to follow-up due to participants returning to home settings following  
39 hospital discharge. A dedicated clinical study team is in place to maximise  
40 follow-up through phone reminders and community visits.  
41  
42
- 43 • The clinical heterogeneity of the study participants, including comorbidities  
44 such as stunting and co-infections, may make it challenging to identify the  
45 specific causes of clinical outcomes. However, the embedded sub-studies will  
46 enable multiple pathways to be explored within the same cohort.  
47  
48  
49  
50  
51  
52  
53  
54  
55  
56  
57  
58  
59  
60

## INTRODUCTION

Malnutrition underlies almost half of all childhood deaths in developing countries<sup>1</sup>. Severe acute malnutrition (SAM) is defined by a weight-for-height Z score <-3, mid-upper arm circumference <115mm and/or bilateral pitting oedema<sup>2</sup>. Current treatment guidelines distinguish two groups: i) children with uncomplicated SAM who can be managed in the community; and ii) children with complicated SAM, who are hospitalised and undergo resuscitation, stabilisation and nutritional rehabilitation. In-hospital mortality in children with complicated SAM remains high despite the implementation of WHO guidelines<sup>3</sup>. Furthermore, SAM presents as two major clinical phenotypes: non-oedematous SAM (marasmus), characterised by severe wasting, and oedematous SAM (kwashiorkor), a more complex syndrome characterised by bilateral pitting oedema, steatosis and diarrhea<sup>4,5</sup>. Despite differing clinical outcomes, treatment protocols are the same for both oedematous and non-oedematous SAM.

A contributory factor to high in-patient mortality is the co-occurrence of HIV infection in around one-third of children hospitalised for SAM in sub-Saharan Africa<sup>6,7</sup>. While new HIV infections in children have declined<sup>8</sup>, a substantial number of infected children are diagnosed late and present with malnutrition. There is also a growing population of HIV-exposed uninfected (HEU) children who have immune abnormalities, poor growth and higher risk of mortality and infectious morbidity<sup>9</sup>. Hence, HIV has transformed the epidemiology and outcomes of SAM<sup>10</sup>. Even with standardised treatment approaches, inpatient deaths are almost four-fold higher among HIV-infected children with SAM (HIV-SAM), compared to HIV-uninfected children with SAM (30.4% vs 8.4%), for reasons that remain unclear<sup>11</sup>; this mortality is three-fold higher than would be expected from anthropometric parameters alone<sup>11</sup>. Management of HIV-SAM is particularly challenging because HIV fundamentally alters the clinical presentation of malnutrition and the response to treatment. Children



1  
2  
3 with HIV-SAM are more stunted and wasted; have a higher frequency of persistent  
4 diarrhoea; tend to have delayed nutritional recovery and have a more complicated  
5 clinical course than children with SAM<sup>11</sup>.  
6  
7  
8  
9

### 10 **Long-term outcomes of SAM**

11  
12 Following resolution of SAM complications and return of appetite, children are  
13 discharged from hospital to continue therapeutic feeds at home. However, emerging  
14 data indicate high post-discharge mortality following in-hospital management of  
15 SAM<sup>12-14</sup>. Malnutrition together with young age, HIV infection and pneumonia have  
16 been associated with higher post-discharge mortality<sup>15</sup>. One of the largest  
17 prospective studies of growth and mortality in children with SAM (FuSAM),  
18 conducted in Malawi from July 2006 to March 2007, collected 12-month outcome  
19 data on 87% of 1024 children admitted to the nutrition ward<sup>12</sup>. A total of 427 (42%)  
20 died and 44% of these deaths occurred after discharge from hospital. Survival was  
21 greatest among those who were nutritionally cured upon discharge from outpatient  
22 therapeutic feeding centres, defined as two consecutive visits with >80% expected  
23 weight-for-height, no oedema and clinically stable. The risk of mortality after hospital  
24 discharge was four-fold higher for HIV-infected compared to HIV-uninfected children,  
25 but the outcomes among HEU children were not reported. The loss to follow-up was  
26 high in the FuSAM study because there was only one follow-up visit, one year after  
27 discharge from outpatient-feeding centres.  
28  
29  
30  
31  
32  
33  
34  
35  
36  
37  
38  
39  
40  
41  
42  
43  
44  
45

46 The impact of SAM appears to persist beyond the first year after discharge from  
47 hospital. The ChroSAM study, which followed children with SAM seven years post-  
48 discharge, showed that children had poorer growth, body composition and physical  
49 function compared to siblings and community controls, which are all indicators of  
50 future cardiovascular and metabolic disease<sup>13</sup>.  
51  
52  
53  
54  
55  
56  
57  
58  
59  
60

1  
2  
3 While anthropometry is used to assess nutritional recovery following discharge from  
4 hospital, the pattern and quality of growth recovery in SAM and HIV-SAM are poorly  
5 understood. The observation that children treated for SAM have a deficit in lean  
6 tissue despite regaining weight suggests that assessing body composition in addition  
7 to anthropometry may help to identify children who have not completely recovered  
8 and are at potential risk of long-term metabolic diseases<sup>13</sup>. Children with HIV-SAM  
9 appear to have potential for catch-up growth since weight-for-age and/or weight-for-  
10 height have been shown to normalise with treatment even prior to widespread  
11 availability of ART<sup>16</sup>. However, the body composition of children with HIV-SAM  
12 compared to SAM has not been described. Whether children with SAM (and in  
13 particular HIV-SAM) recover fat mass at the expense of lean mass is unknown, but  
14 differences in tissue accretion patterns may have implications for survival and long-  
15 term metabolic health<sup>17 18</sup>. There is also a need to consider the effect of SAM on the  
16 size of body parts which grow at different rates: relatively shorter legs, for example,  
17 are associated with epidemiologic risk of overweight, coronary artery disease, liver  
18 dysfunction and diabetes<sup>19 20</sup>.

19  
20  
21 Taken together, there is clearly an elevated risk of mortality among children with HIV-  
22 SAM compared to SAM, and an ongoing mortality risk among all children with SAM  
23 that persists after discharge from hospital. There are several gaps in our  
24 understanding of the long-term outcomes of SAM and HIV-SAM: (i) causes of death  
25 have not been clearly defined; (ii) no studies have systematically and longitudinally  
26 collected morbidity and mortality data or documented repeat hospitalisations post-  
27 discharge; and, (iii) the long-term outcomes of HIV-infected children with SAM in the  
28 era of ART availability are unclear.

### 29 30 31 **Pathogenesis of SAM and HIV-SAM**

32  
33  
34 Better understanding the pathogenesis of SAM may help to explain the high mortality

1  
2  
3 of children both during and after hospitalisation and identify new targets for  
4 interventions to supplement existing treatment strategies. Consistent evidence that  
5 immune mediators are altered in malnutrition<sup>21</sup> and that systemic and intestinal  
6 inflammation are associated with poor outcomes in SAM<sup>22</sup>, suggest that immune  
7 dysfunction contributes to infectious susceptibility<sup>23</sup>. Malnutrition is also characterised  
8 by a complex derangement in gut microbial<sup>24</sup> metabolic,<sup>25</sup> immune<sup>26</sup> and hormonal  
9 pathways, organ dysfunction and micronutrient deficiencies in the context of co-  
10 infections, enteropathy and chronic inflammation. Several studies have recently  
11 provided insights into these perturbations using new tools<sup>25 27-29</sup>, including  
12 metabolomics and metagenomics, but we still lack a clear understanding of many of  
13 the pathogenic pathways driving malnutrition, the interactions between these  
14 pathways, and which are the most tractable targets for intervention.  
15  
16  
17  
18  
19  
20  
21  
22  
23  
24  
25  
26  
27

28 SAM shares several pathological and clinical features with HIV, which may explain  
29 clinical outcomes in these co-occurring conditions: 1) both are characterised by  
30 intestinal damage, leading to impairment of the mucosal barrier and increased  
31 intestinal permeability; 2) both have underlying systemic immune activation; and 3)  
32 both are frequently complicated by persistent diarrhoea, pneumonia and sepsis that  
33 may plausibly arise due to loss of intestinal barrier function<sup>30</sup>. Understanding the  
34 overlapping impact of HIV and SAM is critical to inform additional interventions to  
35 improve outcomes of children with HIV-SAM.  
36  
37  
38  
39  
40  
41  
42  
43  
44  
45

#### 46 **OBJECTIVES OF HOPE-SAM**

47  
48 The Health Outcomes, Pathogenesis and Epidemiology of Severe Acute Malnutrition  
49 (HOPE-SAM) study has two primary objectives:  
50

- 51 1) To describe the short- and long-term clinical outcomes of children with  
52 complicated SAM and HIV-SAM, and to identify the risk factors at admission  
53 and discharge from hospital that independently predict these outcomes.  
54  
55  
56  
57  
58  
59

- 1  
2  
3 2) To better characterise the pathogenesis of SAM and HIV-SAM, through  
4 nested laboratory sub-studies evaluating enteropathy, gut microbiota,  
5 metabolomics and immune cell function.  
6  
7  
8  
9

## 10 **STUDY DESIGN**

11 HOPE-SAM is a longitudinal observational cohort study, enrolling between 600-800  
12 children aged 0-59 months admitted with SAM to the tertiary pediatric wards at two  
13 sites in Zimbabwe (Parirenyatwa Hospital and Harare Children's Hospital) and one in  
14 Zambia (University Teaching Hospital, Lusaka). Both HIV-infected and HIV-  
15 uninfected children will be enrolled. All participants with SAM are followed for 48  
16 weeks post-discharge, with longitudinal data collection and blood sampling; a  
17 subgroup of 200 children will be recruited to the enteropathy substudy for which they  
18 will have the same follow-up procedures but more intensive biological specimen  
19 collection including stool (all time-points), urine after lactulose-mannitol (LM)  
20 challenge as an assessment of intestinal permeability, and nasogastric aspirate  
21 (baseline only). A group of 200 healthy children recruited from the same hospitals,  
22 who are well-nourished and matched to children in the enteropathy substudy by age  
23 and HIV status, will have data and specimens collected to provide normative data for  
24 the laboratory substudies; these healthy controls will not be followed longitudinally.  
25 The study overview is shown in **Figure 1**.  
26  
27  
28  
29  
30  
31  
32  
33  
34  
35  
36  
37  
38  
39  
40  
41  
42  
43

44 The study protocol, data collection forms and standard operating procedures are  
45 available as Supplementary Materials.  
46  
47  
48  
49

## 50 **RECRUITMENT**

51 *Screening:* Caregivers of all hospitalised children are sensitised about the study. All  
52 new admissions aged 0-59 months are screened for SAM, which is defined  
53  
54  
55  
56  
57  
58  
59  
60

according to WHO criteria as any of: weight-for-height Z-score (WHZ) <-3, mid-upper arm circumference <115 mm (if aged 6-59mo) and/or bilateral pitting oedema.

*Eligibility for observational cohort:* All children with SAM whose caregivers are willing to provide written informed consent and to learn their child's HIV status are offered enrolment. Any children who die prior to study enrolment and those with a known malignancy are ineligible.

*Eligibility for enteropathy substudy:* Cases (Groups A and C, **Table 1**) are children with SAM aged 6-59 months with a nasogastric tube in place (or due to be placed). Controls (Groups B and D) are children receiving inpatient or outpatient care at the study sites, who are aged 6-59 months (matched to cases within age bands), well-nourished (weight-for-height Z-score >-1) and clinically well (no acute illness or current infections) with known HIV status. Children with underlying chronic gastrointestinal disease or a known malignancy are ineligible.

**Table 1: Enteropathy substudy groups**

| Children aged 6-59 months                                             | Severe acute malnutrition <sup>1</sup> |                      | Well nourished<br>WHZ>-1        |
|-----------------------------------------------------------------------|----------------------------------------|----------------------|---------------------------------|
|                                                                       | Oedematous <sup>2</sup>                | Non-oedematous       |                                 |
| <b>HIV-infected</b><br>(HIV PCR+ if <18mo; HIV antibody + if >18mo)   | N=50<br>(Group A-I)                    | N=50<br>(Group A-II) | N=100 <sup>3</sup><br>(Group B) |
| <b>HIV-uninfected</b><br>(HIV PCR- if <18mo; HIV antibody - if >18mo) | N=50<br>(Group C-I)                    | N=50<br>(Group C-II) | N=100 <sup>4</sup><br>(Group D) |

<sup>1</sup>SAM defined according to WHO criteria

<sup>2</sup>Presence of bilateral pitting pedal oedema.

<sup>3</sup>Age-matched to group A (within the following age bands: 6-11 months; 12-23 months; 24-59 months).

<sup>4</sup>Age-matched to group C (within the following age bands: 6-11 months; 12-23 months; 24-59 months)

Note that children age 0-5 months are excluded from the enteropathy substudy

WHZ: Weight-for-height Z score; MUAC: Mid-upper arm circumference; PCR: polymerase chain reaction.

*Eligibility for other sub-studies:* Children enrolled into the enteropathy substudy are also included in the microbiome and metabolome substudies. The immunology substudy comprises all children with SAM providing a blood sample of sufficient volume (>2ml) for cellular assays.

*Informed consent procedures:* Written informed consent is obtained from the primary caregiver using consent forms translated into local languages; we generally include other family members in the consent process. Illiterate caregivers who have understood a verbal explanation of the study can provide a thumb imprint in the presence of a witness. Assent from children is not sought because all are <5 years old.

## STUDY PROCEDURES

Study procedures are outlined in **Table 2**.

**Table 2: Summary of procedures in observational SAM cohort**

| Assessment (Form used)                                                                                                                                                      | Hospitalization       |                        | Post-discharge <sup>3</sup> |    |     |     |     |
|-----------------------------------------------------------------------------------------------------------------------------------------------------------------------------|-----------------------|------------------------|-----------------------------|----|-----|-----|-----|
|                                                                                                                                                                             | Baseline <sup>1</sup> | Discharge <sup>2</sup> | 2w                          | 4w | 12w | 24w | 48w |
| Caregiver informed consent to join observational cohort (HOPE-SAM Form_2_Observational Cohort Informed Consent Form and HOPE-SAM Form_6_Specimen Storage and Shipment form) | x                     |                        |                             |    |     |     |     |
| Summary checklist (HOPE-SAM Form_3_Study Checklist)                                                                                                                         | x                     |                        |                             |    |     |     |     |
| Locator information <sup>4</sup> (HOPE-SAM Form_9_Locator Information)                                                                                                      | x                     |                        |                             |    |     |     |     |
| Acute admission information (HOPE-SAM                                                                                                                                       | x                     |                        |                             |    |     |     |     |

|                                                                                                                                                           |                              |   |                                             |   |   |   |   |
|-----------------------------------------------------------------------------------------------------------------------------------------------------------|------------------------------|---|---------------------------------------------|---|---|---|---|
| <b>Form_4_Acute Admission Proforma)</b>                                                                                                                   |                              |   |                                             |   |   |   |   |
| Baseline data (HOPE-SAM Form_5_Baseline Form)                                                                                                             | x                            |   |                                             |   |   |   |   |
| Daily clinical review <sup>5</sup> (HOPE-SAM Form_7_Daily Follow-up Form)                                                                                 | Daily during hospitalisation |   |                                             |   |   |   |   |
| Blood collection <sup>6</sup>                                                                                                                             | x                            | x |                                             |   | x | x | x |
| HIV testing <sup>7</sup>                                                                                                                                  | x                            |   |                                             |   |   |   |   |
| CD4 count and viral load (HIV-infected children only)                                                                                                     | x                            |   |                                             |   | x | x | x |
| Full blood count <sup>8</sup>                                                                                                                             | x                            | x |                                             |   | x | x | x |
| Anthropometry                                                                                                                                             | x                            | x | x                                           | x | x | x | x |
| Skinfold thickness <sup>9</sup>                                                                                                                           |                              | x | x                                           | x | x | x | x |
| Body composition <sup>10</sup>                                                                                                                            | x                            | x | x                                           | x | x | x | x |
| Discharge data collection (HOPE-SAM Form_8_Discharge Form)                                                                                                |                              | x |                                             |   |   |   |   |
| Daily morbidity diary (HOPE-SAM Form_10_Morbidity Diary)                                                                                                  |                              |   | Daily during follow-up period by caregivers |   |   |   |   |
| Follow-up clinic: history, examination, morbidity and mortality data (HOPE-SAM Form_11_Clinical Follow-up Form and HOPE-SAM Form_12_Nurse Follow-up Form) |                              |   | x                                           | x | x | x | x |

<sup>1</sup>Children will be enrolled as soon as possible after hospitalisation and will undergo baseline investigations as soon as possible after enrolment. This is to provide a window of opportunity to time collection of research specimens with clinical specimens, and to ensure that the child is clinically stable before undertaking research investigations.

<sup>2</sup>The discharge procedures will be undertaken on the day of discharge, or as close as possible to that date.

<sup>3</sup>Windows will be created around these post-discharge time-points to maximize follow-up for caregivers who miss visits or are unavailable, as follows: 2 weeks (1-3 weeks); 4 weeks (3-5 weeks); 12 weeks (10-14 weeks); 24 weeks (20-28 weeks); 48 weeks (44-52 weeks).

<sup>4</sup>Locator information will updated using **HOPE-SAM Form\_9\_Locator Information** at subsequent visits if caregivers have moved or changed contact details.

<sup>5</sup>A clinical review will be undertaken every day between admission and discharge by the study clinician, using **HOPE-SAM Form\_7\_Daily Follow-up Form**.

<sup>6</sup>5.4 mL of blood (depending on child weight; amount will not exceed 2 mL/kg total over 2 week period) will be collected by a study nurse into endotoxin-free EDTA tubes. Samples will be used to store whole blood, PBMC and plasma for subsequent measurement of CRP and albumin. Where blood sample volumes allow ( $\geq 2$ mL sample), bacterial binding assays and whole blood stimulations will be conducted and culture supernatants and cells stored for subsequent assessment of immune cell function at each time-point.

Study blood samples will not be collected from children with known haemoglobin  $< 6$  g/dL.

<sup>7</sup>Infant HIV testing is conducted as part of routine clinical practice, but if it has not been undertaken, the study sample will be used to test for HIV, as stated in the informed consent form, since HIV status is required to allocate children to study groups.

<sup>8</sup>Full blood count results will be transcribed from clinical records; if not done by clinical teams, the EDTA sample will be used to measure FBC in clinical laboratories at each site

<sup>9</sup>Skinfold thickness (triceps, subscapular, supra-iliac) and mid-thigh circumference will be measured using Holtain calipers or tape measure.

<sup>10</sup>Body composition will be assessed by bioimpedance vector analysis.

### *Baseline procedures:*

Baseline data on maternal and household characteristics, the child's past medical history and current illness are collected by a study nurse. Anthropometry, including body composition measured by whole-body (wrist-ankle) bio-electrical impedance analysis (BodyStat 1500MD; BodyStat Ltd., Douglas, Isle of Man), leg length using an electronic knemometer (Zimbabwe only) and triceps, subscapular and supra-iliac skinfold thickness using calipers (Holtain Ltd., Crymich, UK) are undertaken at baseline. Blood (1mL/kg up to 5.4mL maximum) is collected at baseline into an endotoxin-free EDTA tube for all children and, in the enteropathy substudy, additionally into a PAXgene tube (PreAnalytiX GmbH, Hombrechtikon, Switzerland) for subsequent transcriptomic analysis. Blood is not collected from children with severe anaemia (known haemoglobin <6 g/dL). HIV testing is carried out in accordance with national guidelines as part of routine clinical practice; where it has not been done, the child's HIV status is ascertained using a rapid test antibody algorithm for children over 18 months, or HIV DNA PCR for children under 18 months. CD4 count/percentage and viral load are measured in HIV-infected children. Maternal HIV status is documented where available, so that HIV-exposed uninfected children can be identified. Blood samples are sent to research laboratories at each site to conduct whole blood stimulation and bacterial binding assays (as described in the immunology substudy) and to store aliquots of whole blood, peripheral blood cells and plasma at -80°C<sup>31</sup>. In the enteropathy substudy, nasogastric aspirate, stool and urine (after an oral dose of lactulose and mannitol) are also collected. Lactulose and



mannitol are ingested by the child after fasting and urine is collected over a two-hour period to measure recovery of lactulose and mannitol, a measure of intestinal absorptive capacity and permeability, as previously described<sup>32</sup>.

*Daily procedures:* Routine inpatient management is undertaken by ward clinical teams according to local hospital protocols, which are based on WHO guidelines<sup>33</sup>. In addition, the HOPE-SAM study clinician at each hospital site collects daily data until discharge on clinical parameters (including daily examination), resolution of acute infections, nutritional recovery (loss of oedema, restoration of appetite, weight gain), and treatment/nutritional supplements received. Children with HIV-SAM who are ART-naïve start ART according to WHO guidelines<sup>34</sup>.

*Discharge:* The clinical team decides when the child is ready to be discharged. Children receive ready-to-use therapeutic feeds (RUTF) to take at home according to local guidelines. At discharge, the study nurse collects data and a repeat blood sample (including full blood count) and undertakes discharge anthropometry, body composition, leg length (Zimbabwe only) and triceps, subscapular and supra-iliac skinfold thickness measurements (**Table 2**). The caregiver is given a daily morbidity diary and pre-prepared stickers corresponding to different illnesses and shown how to complete the diary. The caregiver is provided with the date of the first follow-up appointment and contact details of the study nurse.

*Follow-up:* Children attend follow-up appointments at dedicated study clinics at 2, 4, 12, 24 and 48 weeks post-discharge. At each visit, the study physician undertakes a clinical assessment and the study nurse captures illness, medication and feeding data. Clinic data are transcribed from handheld medical records if available and the morbidity diary is reviewed and a new diary and stickers supplied. Anthropometry, body composition, leg length (Zimbabwe only) and triceps, subscapular and supra-

iliac skinfold thicknesses are measured at each visit. Acute illnesses are treated in the study clinic, or the child is referred to hospital if necessary. Children with relapsed malnutrition are provided with nutritional supplements according to local guidelines. Transport reimbursement for clinic attendance is provided to caregivers for each visit.

Blood is collected at weeks 12, 24 and 48 post-discharge into endotoxin-free EDTA tubes to measure full blood count, CD4 count and viral load (HIV-infected group only), conduct whole blood stimulation and bacterial binding assays, and store peripheral blood cells and plasma aliquots for subsequent analysis, including soluble and cellular markers of immune activation, as outlined in **Supplementary Table 1**. Children in the enteropathy substudy have additional stool and urine collection following lactulose-mannitol dosing as shown in **Table 3**.

**Table 3: Summary of procedures for cases in the enteropathy substudy**

| Assessment (Form used)                                                                                                                                                                      | Hospitalization       |                        | Post-discharge <sup>3</sup> |    |     |     |     |
|---------------------------------------------------------------------------------------------------------------------------------------------------------------------------------------------|-----------------------|------------------------|-----------------------------|----|-----|-----|-----|
|                                                                                                                                                                                             | Baseline <sup>1</sup> | Discharge <sup>2</sup> | 2w                          | 4w | 12w | 24w | 48w |
| Caregiver informed consent to join observational cohort and enteropathy substudy<br>(HOPE-SAM Form_14_Enteropathy Substudy Case Consent Form and Form_6_Specimen Storage and Shipment form) | x                     |                        |                             |    |     |     |     |
| Summary checklist (HOPE-SAM Form_3_Study Checklist)                                                                                                                                         | x                     |                        |                             |    |     |     |     |
| Locator information <sup>4</sup> (HOPE-SAM Form_9_Locator Information)                                                                                                                      | x                     |                        |                             |    |     |     |     |
| Acute admission information (HOPE-SAM Form_4_Acute)                                                                                                                                         | x                     |                        |                             |    |     |     |     |

|                                                                                                                                                                                   |                                 |   |                                                |   |   |   |   |
|-----------------------------------------------------------------------------------------------------------------------------------------------------------------------------------|---------------------------------|---|------------------------------------------------|---|---|---|---|
| <b>Admission Proforma)</b>                                                                                                                                                        |                                 |   |                                                |   |   |   |   |
| Baseline data<br>(HOPE-SAM<br>Form_5_Baseline<br>Form)                                                                                                                            | x                               |   |                                                |   |   |   |   |
| Daily clinical review <sup>5</sup><br>(HOPE-SAM<br>Form_7_Daily Follow-<br>up Form)                                                                                               | Daily during<br>hospitalisation |   |                                                |   |   |   |   |
| Blood collection <sup>6</sup>                                                                                                                                                     | x                               | x |                                                |   | x | x | x |
| HIV testing <sup>7</sup>                                                                                                                                                          | x                               |   |                                                |   |   |   |   |
| CD4 count and viral<br>load (HIV-infected<br>children only)                                                                                                                       | x                               |   |                                                |   | x | x | x |
| Full blood count <sup>8</sup>                                                                                                                                                     | x                               | x |                                                |   | x | x | x |
| Gastric aspirate <sup>9</sup>                                                                                                                                                     | x                               |   |                                                |   |   |   |   |
| Stool collection <sup>10</sup>                                                                                                                                                    | x                               | x |                                                |   | x | x | x |
| Lactulose-mannitol<br>testing <sup>11</sup>                                                                                                                                       | x                               | x |                                                |   | x |   | x |
| Anthropometry                                                                                                                                                                     | x                               | x | x                                              | x | x | x | x |
| Skinfold thickness <sup>12</sup>                                                                                                                                                  |                                 | x | x                                              | x | x | x | x |
| Body composition <sup>13</sup>                                                                                                                                                    | x                               | x | x                                              | x | x | x | x |
| Discharge data<br>collection<br>(HOPE-SAM<br>Form_8_Discharge<br>Form)                                                                                                            |                                 | x |                                                |   |   |   |   |
| Daily morbidity diary<br>(HOPE-SAM<br>Form_10_Morbidity<br>Diary)                                                                                                                 |                                 |   | Daily during follow-up period by<br>caregivers |   |   |   |   |
| Follow-up clinic: history,<br>examination, morbidity<br>and mortality data<br>(HOPE-SAM<br>Form_11_Clinical<br>Follow-up Form and<br>HOPE-SAM<br>Form_12_Nurse<br>Follow-up Form) |                                 |   | x                                              | x | x | x | x |

<sup>1</sup>Children will be enrolled within 24h of hospitalization and will undergo baseline investigations within 72h of hospitalization. This is to provide a window of opportunity to time collection of research specimens with clinical specimens, and to ensure that the child is clinically stable before undertaking research investigations.

<sup>2</sup>The discharge procedures will be undertaken on the day of discharge, or as close as possible to that date.

<sup>3</sup>Windows will be created around these post-discharge time-points to maximize follow-up for caregivers who miss visits or are unavailable, as follows: 2 weeks (1-3 weeks); 4 weeks (3-5 weeks); 12 weeks (10-14 weeks); 24 weeks (20-28 weeks); 48 weeks (44-52 weeks).

<sup>4</sup>Locator information will updated using HOPE-SAM Form\_9 Locator Information at subsequent visits if caregivers have moved or changed contact details.

<sup>5</sup>Daily clinical review will be conducted every day between admission and discharge by the study clinician, using **HOPE-SAM Form 7 Daily Follow-up Form**

<sup>6</sup>During hospitalisation, 5.4 mL of blood (depending on child weight; amount will not exceed 2 mL/kg total over 2 week period) will be collected by a study nurse into a 2.7 mL endotoxin-free EDTA tube and a 2.7 mL PAXGene tube, for subsequent isolation of RNA and gene expression analysis (see Table 7). After discharge (weeks 12, 24 and 48), 5.4 mL of blood (depending on child weight; amount will not exceed 2 mL/kg total over 2 week period) will be collected by a study nurse into two 2.7 mL endotoxin-free EDTA tubes.

<sup>7</sup>Infant HIV testing is conducted as part of routine clinical practice, but if it has not been undertaken, the study sample will be used to test for HIV (see section 9.4), as stated in the informed consent form, since HIV status is required to allocate children to study groups.

<sup>8</sup>Full blood count results will be transcribed from clinical records; if not done by clinical teams, the EDTA sample will be used to measure FBC in clinical laboratories at each site

<sup>9</sup>A gastric juice sample will be collected at the same time as the blood draw by aspirating the nasogastric tube with a sterile feeding syringe, to test for gastric pH; sterile water or saline will then be instilled and a sample of gastric juice collected for storage for subsequent PCR and culture (section 7.5.2)

<sup>10</sup>Stool collection will be undertaken at the same time as the blood draw as described in section 7.5.3.

<sup>11</sup>Lactulose-mannitol testing will be conducted as described in section 7.5.4, with collection of a baseline urine sample, followed by a 2hr urine collection post-LM ingestion. This test will be deferred until children are judged to be clinically stable by the study physician during daily reviews. In general, this will be a child in the nutritional rehabilitation phase, who has no cardiorespiratory compromise.

<sup>12</sup>Skinfold thickness (triceps, subscapular, supra-iliac) and mid-thigh circumference will be measured using Holtain calipers or tape measure as explained in section 7.5.7.

<sup>13</sup>Body composition will be assessed by bioimpedance vector analysis (see section 7.5.6)

Caregivers are reminded of follow-up visits by phone, and visit completion is tracked on a dedicated database. If caregivers do not attend follow-up appointments, attempts are made to contact them by phone and home visits are made if feasible, particularly for those defaulting the 48-week visit, so that long-term outcome data can be collected. For post-discharge deaths, a home visit is undertaken by study nurses where possible to conduct a verbal autopsy. Children who are readmitted to one of the study sites with relapsed SAM have data collected during the new episode of hospitalisation. The study ends for each participant at the week 48 visit.

## **SUBSTUDIES**

Several nested substudies will utilise biological specimens to address mechanistic questions related to enteropathy, microbiota, metabolomics and immune function.

### *Enteropathy substudy*

The gut, which acts as an internal interface between humans and the environment, must contain the nutrient stream and the symbiotic microbiota while allowing molecular intimacy to permit absorption. The mechanism underlying this duality is the integrity of the gastrointestinal barrier; intestinal damage (enteropathy) can impair this critical barrier function. A spectrum of enteropathies affect children in developing countries<sup>30</sup>. Environmental enteric dysfunction (EED), characterised by small intestinal inflammation, blunted villi and increased intestinal permeability, is almost universal and is morphologically indistinguishable from HIV enteropathy<sup>30</sup>. Children in resource-poor settings also suffer from frequent diarrhoea, food insecurity and micronutrient deficiencies, which all exacerbate enteropathy<sup>30</sup>. As a result, a cycle of intestinal infection, impaired mucosal function and malnutrition commonly arises, which may ultimately precipitate SAM, especially in the context of HIV infection<sup>35 36</sup>. It is not yet established if the enteropathy seen in children with SAM<sup>37</sup>, which we here refer to as malnutrition enteropathy<sup>37</sup>, is qualitatively or quantitatively distinguishable from EED. In addition to local intestinal pathology, enteropathies may cause systemic pathology due to persistent immune activation arising from enteric inflammation and microbial translocation across the damaged gut wall<sup>30</sup>. It is becoming apparent that chronic inflammation may be particularly deleterious in malnourished individuals<sup>22</sup>; in children with SAM, systemic inflammation arising from underlying enteropathy may further increase morbidity and mortality.

We hypothesize that i) the degree of enteropathy during hospitalisation differs between oedematous and non-oedematous SAM and is independently associated with morbidity, mortality and nutritional recovery during hospitalization; ii) the degree of enteropathy at discharge is independently associated with morbidity, mortality and relapse of SAM; and iii) children with HIV-SAM have more severe enteropathy than children with SAM alone, which contributes to their poorer outcomes.

1  
2  
3  
4  
5 Using stored samples, a longitudinal series of investigations will compare gastric and  
6 small intestinal barrier function, using a range of biomarkers to capture the domains  
7 of malnutrition enteropathy (**Supplementary Table 2**). To understand better the  
8 extra-intestinal consequences of enteropathy, we will first compare the microbial  
9 composition of the upper gut and plasma using deep sequencing in a subgroup of  
10 children with paired gastric and blood samples. Secondly, we will undertake  
11 transcriptomics using PAXGene blood samples to determine i) whether there are  
12 differences in gene expression profiles between healthy controls, SAM and HIV-SAM  
13 (including comparison of oedematous and non-oedematous types); and ii) whether  
14 specific patterns of gene expression are associated with morbidity and mortality in  
15 SAM.  
16  
17  
18  
19  
20  
21  
22  
23  
24  
25  
26  
27

#### 28 *Microbiota substudy*

29  
30 Normal assembly of the gut microbiota in early life is critical for many aspects of  
31 physiological, neurological and immune development<sup>38</sup>. Recent evidence suggests  
32 that an immature or pathogenic microbiota plays a causative role in the pathogenesis  
33 of SAM<sup>27</sup>. For example, a number of microbial taxa have been identified, including  
34 *Faecalibacterium prausnitzii*, which discriminate and predict gut microbiota maturity  
35 and child growth<sup>39</sup>. Other pathogenic microorganisms, including IgA-targeted  
36 *Enterobacteriaceae*, are associated with impaired growth and may contribute to  
37 SAM<sup>40</sup>. Nutritional rehabilitation with RUTF induces temporary recovery of a  
38 disturbed microbiota; however, the microbiota appears to revert back to an immature  
39 diseased state following nutritional recovery<sup>41</sup>. HIV infection is also associated with a  
40 disturbed gut microbiota<sup>42</sup>, which may further compound enteropathy phenotypes.  
41  
42 Furthermore, there is some evidence that differences exist in malnutrition  
43 enteropathy between oedematous and non-oedematous SAM<sup>43</sup>; however, few  
44  
45  
46  
47  
48  
49  
50  
51  
52  
53  
54  
55  
56  
57  
58  
59  
60

1  
2  
3 studies have investigated differences in the gut microbiota between the two forms of  
4  
5 the disease.  
6  
7

8  
9 We hypothesize that (i) a unique gut microbial signature exists in HIV-SAM,  
10 compared with SAM, that is independently associated with morbidity, mortality,  
11 nutritional recovery and degree of enteropathy during hospitalisation; (ii) a unique gut  
12 microbial signature exists in oedematous compared with non-oedematous SAM; (iii)  
13 specific microorganisms or gut microbial diversity indices are independently  
14 associated with morbidity, mortality, nutritional recovery and degree of enteropathy  
15 during hospitalisation; and (iv) the gut microbiota is partially restored to a healthy  
16 state with nutritional rehabilitation but reverts to a dysbiotic state during follow-up,  
17 which predicts morbidity, mortality and relapse of SAM.  
18  
19  
20  
21  
22  
23  
24  
25  
26  
27

28 Using stored stool samples collected at baseline, a cross-sectional investigation will  
29 determine differences in the gut microbial composition and predicted function  
30 between SAM versus HIV-SAM, oedematous versus non-oedematous SAM, and  
31 healthy controls. Gut microbial composition and predicted function will be compared  
32 between groups at discharge and at 12, 24 and 48 weeks post-discharge. Briefly,  
33 total DNA and/or RNA will be extracted from stool samples and used as template for  
34 next-generation sequencing library preparation and for quantitative polymerase chain  
35 reaction (qPCR). Whole metagenome shotgun sequencing will be performed using  
36 the HiSeq 2500 system. Raw metagenomic sequencing data will be quality-filtered  
37 and analysed through a well-validated bioinformatics pipeline using MetaPhlAn<sup>44</sup> and  
38 HUMAnN<sup>45</sup>. The compositional and predicted functional metagenomic data  
39 generated will be used to identify signatures of SAM and to investigate associative  
40 links between specific gut microbial signatures and clinical outcomes.  
41  
42  
43  
44  
45  
46  
47  
48  
49  
50  
51  
52  
53  
54  
55  
56  
57  
58  
59  
60

### *Metabolomics substudy*

During SAM, metabolic processes are altered in response to a starved environment, and may plausibly contribute to long-term clinical outcomes. Previous studies suggest that amino acid turnover, lipid metabolism, oxidative stress and other metabolic pathways are disrupted in SAM and may be associated with disease state and clinical outcome<sup>25 46 47</sup>; however, little is known about how the metabolic phenotype responds to nutritional therapy. It is hypothesised that disturbed gut microbiota composition and function may drive microbial metabolic dysregulation in addition to host-derived dysregulation. Of particular interest are differences in the metabolic phenotype between oedematous and non-oedematous SAM. The 'reductive adaptation' seen in non-oedematous SAM (utilisation of fat and muscle stores) is disrupted in oedematous SAM, which may contribute to differences in clinical outcomes. Specifically, protein turnover, inflammation, oxidative stress and bile acid metabolism are disrupted in oedematous-SAM, which may contribute to comorbidities including diarrhoea, steatosis and enteropathy<sup>48 49</sup>.

We hypothesize that: (i) a unique plasma and urine metabolic phenotype exists in oedematous compared with non-oedematous SAM during hospitalisation, which is independently associated with morbidity, mortality and nutritional recovery; (ii) the metabolic phenotype is partially restored to a healthy state with nutritional rehabilitation but reverts to a disturbed state during follow-up, which predicts morbidity, mortality and relapse; and (iii) both host-derived and gut microbial-driven metabolic dysregulation underlie clinical outcomes.

Using stored urine and plasma samples collected during hospitalisation, a cross-sectional investigation will determine differences in the metabolic phenotype between children with oedematous SAM, non-oedematous SAM and healthy controls. Urine and plasma metabolic phenotypes will be compared between groups at discharge



1  
2  
3 and 12, 24 and 48 weeks post-discharge. Briefly, global untargeted metabolomic  
4 phenotyping will be performed via <sup>1</sup>H nuclear magnetic resonance (NMR)  
5 spectroscopy using a 700 MHz Bruker NMR spectrometer to identify metabolic  
6 signatures of SAM. Targeted analysis via ultra-performance liquid chromatography-  
7 mass spectrometry will be performed to examine specific pathways of interest,  
8 including tryptophan and bile acid metabolism.  
9  
10  
11  
12  
13  
14  
15

### 16 *Immunology substudy*

17  
18 Bacterial infections are common among children hospitalised for SAM<sup>50-53</sup> and  
19 mortality is driven by a range of species<sup>51 53-56</sup>, consistent with generalised defects in  
20 innate anti-bacterial defence. Increased infectious morbidity and mortality persist  
21 after discharge from hospital<sup>57-59</sup>, suggesting that restoration of anti-bacterial immune  
22 responses may lag behind nutritional rehabilitation. A recent randomised trial in  
23 children with SAM confirmed that deaths following hospitalisation were predominantly  
24 due to bacterial infections but were not prevented by daily co-trimoxazole  
25 prophylaxis<sup>59</sup>. Collectively, these observations highlight that children remain  
26 vulnerable to infection despite current treatment approaches; targeting persistent  
27 immune dysfunction could plausibly reduce infectious mortality after discharge<sup>60</sup>.  
28  
29  
30  
31  
32  
33  
34  
35  
36  
37  
38  
39

40 Multiple innate and adaptive immune mediators are dysregulated in malnutrition<sup>60-62</sup>.  
41 However, few studies have assessed cellular immune function in malnourished  
42 children; most existing studies were undertaken decades ago on small cross-  
43 sectional cohorts without the benefit of recent advances in immunology techniques<sup>61</sup>.  
44 Immune dysfunction in SAM likely reflects both *intrinsic* defects, whereby immune  
45 cells lack capacity to adequately respond to infection, and *extrinsic* defects, where  
46 cells have intact anti-bacterial capacity but are chronically modulated by the systemic  
47 pro-inflammatory environment which characterises SAM (i.e. heightened pro-  
48 inflammatory cytokines<sup>50 63</sup> and circulating bacterial antigens<sup>64 65</sup>). Systemic  
49  
50  
51  
52  
53  
54  
55  
56  
57  
58  
59  
60

1  
2  
3 inflammation is directly associated with mortality in SAM<sup>50</sup> and driven by multiple  
4 comorbidities, including bacterial translocation from the damaged gut into the blood,  
5 sub-clinical infections and metabolic dysregulation<sup>63-66-68</sup>. The implications of innate  
6 immune cell dysfunction for subsequent acquisition of infections and infectious  
7 mortality have not been investigated.  
8  
9  
10  
11  
12  
13

14 We hypothesise that: (i) anti-bacterial functions of innate immune cells are  
15 compromised in SAM due to a combination of intrinsic and extrinsic defects; ii) innate  
16 immune cell function is independently associated with infectious morbidity and  
17 mortality during hospitalisation for SAM; and iii) nutritional rehabilitation only partly  
18 restores innate immune cell function, leading to an ongoing risk of bacterial infections  
19 post-discharge.  
20  
21  
22  
23  
24  
25  
26  
27

28 Using blood samples collected at baseline, discharge and 12, 24 and 48 weeks post-  
29 discharge, the longitudinal relationship between circulating innate immune cell  
30 function and bacterial infections will be assessed. The intrinsic phagocytic capacity,  
31 secreted cytokine response and maturation state of innate immune cells after culture  
32 with bacterial antigens will be assessed. Plasma concentrations of endotoxin and  
33 pro-inflammatory cytokines will be quantified at each time-point and the degree to  
34 which these extrinsic factors influence innate immune cell antibacterial function will  
35 be assessed via plasma co-culture with innate immune cells from healthy donors.  
36 Bacterial infections during hospitalisation will be diagnosed using clinical criteria and  
37 blood culture, stool culture and urinalysis where available.  
38  
39  
40  
41  
42  
43  
44  
45  
46  
47  
48  
49

## 50 **SAMPLE SIZE**

51 *Observational study:* The observational cohort will recruit as many children with SAM  
52 as possible during the period of enrolment (July 2016 to March 2018), estimated at  
53 600-800 children, to provide a robust assessment of outcomes among children  
54  
55  
56  
57  
58  
59  
60

1  
2  
3 hospitalised with SAM. Assuming 15% mortality and 15% loss to follow-up, there  
4 would be at least 420 evaluable children post-discharge, of whom up to 168 would  
5 have HIV-SAM, based on an estimated inpatient HIV prevalence of 40%.  
6  
7  
8  
9

10 *Enteropathy substudy:* The sample size was estimated using previously reported  
11 values for LM ratios, which remain a widely used non-invasive marker of  
12 enteropathy. Comparing 100 versus 100 children with two-sided  $\alpha=0.025$  (to  
13 allow for two primary comparisons, i.e. HIV-SAM versus SAM, and HIV-SAM versus  
14 HIV) provides >80% power to detect differences in mean LM ratio during  
15 hospitalisation of at least 0.16 (assuming  $SD=0.36$ ), a difference which would be  
16 clinically relevant given the LM ratios previously reported for well-nourished children  
17 (0.42), malnourished children (1.3) and children with persistent diarrhoea (2.85) in  
18 the Gambia<sup>69</sup>. It also provides >80% power to detect differences of at least 0.1 in the  
19 mean change in LM ratio from enrolment (assuming  $SD$  for change= $0.23$  and 7%  
20 missing samples). For inflammatory markers, comparing 100 versus 100 children  
21 with two-sided  $\alpha=0.025$  provides >80% power to detect differences in mean  $\log_{10}$   
22 concentrations of at least 0.44 times their standard deviation, or 2.75-fold differences  
23 between groups. Inclusion of healthy controls provides an indication of normal  
24 ranges in young African children. SAM groups will be stratified to include  
25 approximately 50 children with and without oedematous malnutrition, if possible.  
26  
27  
28  
29  
30  
31  
32  
33  
34  
35  
36  
37  
38  
39  
40  
41  
42  
43

#### 44 *Microbiota and metabolomics substudy*

45  
46 Power calculations are difficult in metagenomics and metabolomic analyses due to  
47 the large number of observed outcomes and unknown effect sizes and variance.  
48  
49 Previous studies using smaller sample sizes have identified significant taxonomic  
50 differences in twin pairs discordant for oedematous-SAM ( $n=13$ )<sup>24</sup> and metabolic  
51 differences between the two forms of SAM ( $n=40$ )<sup>70</sup>. These studies suggest that a  
52 difference of 50% in metabolites could be expected. Using ANCOVA, setting  $\alpha=0.05$   
53  
54  
55  
56  
57  
58  
59  
60

1  
2  
3 and assuming either low ( $\rho=0.1$ ) or high ( $\rho=0.7$ ) correlation, the study would require  
4 95-126 subjects to achieve 80% power<sup>71</sup>. False discovery rate (FDR) multiple  
5  
6 correction testing will be applied to reduce the high-dimensionality of the data and  
7  
8 limit false-positives.  
9

### 10 11 12 *Immunology substudy*

13  
14 Up to 200 children with SAM and 200 healthy controls will be included in a cross-  
15  
16 sectional analysis of innate immune cell function during hospitalisation. Assuming  
17  
18 similar infectious mortality to a recent Kenyan study (15%)<sup>59</sup>, a cohort of 200 provides  
19  
20 80% power to detect associations between immune profiles and infectious mortality  
21  
22 at an odds ratio of 1.7 and 2-sided alpha of 0.05. We will aim for 100 children with  
23  
24 longitudinal analysis of innate immune cell function at discharge, 12, 24 and 48  
25  
26 weeks post-discharge<sup>59</sup>.  
27  
28  
29

## 30 31 **ANALYSIS**

### 32 *Observational Cohort*

33  
34 The primary comparison will be the clinical and nutritional outcomes of children with  
35  
36 SAM compared to HIV-SAM. We will review all deaths and adjudicate clinical  
37  
38 diagnoses and causes of death to ensure robust and consistent data across sites.  
39  
40 We will compare each participant's clinical management to WHO guidelines to  
41  
42 identify any contributory factors in hospital care. Factors associated with outcomes  
43  
44 during hospitalisation (e.g. mortality, nutritional recovery) will be determined for each  
45  
46 group using multivariate analysis (Cox models for time-to-event data, linear models  
47  
48 for continuous outcomes). Factors associated with outcomes over 48 weeks post-  
49  
50 discharge (hospital re-admission, morbidity and mortality, relapse, anthropometry,  
51  
52 body composition and response to ART) will be determined for each group using  
53  
54 multivariate analysis (Cox models for time-to-event data, linear models for  
55  
56 continuous outcomes). We will evaluate the ability of MUAC at discharge to predict  
57  
58  
59  
60

1  
2  
3 long-term outcomes using receiver-operator-characteristic (ROC) analysis, in the  
4 whole cohort and within the HIV-SAM and SAM subgroups. We will then evaluate  
5 whether addition of other variables improves the predictive capacity of MUAC for  
6 each group, including body composition, haemoglobin, albumin and CRP, plus  
7 CD4%, viral load and timing of ART initiation (HIV-SAM only). We will construct  
8 multivariable models and compare them with MUAC alone using the net-  
9 reclassification index.  
10  
11  
12  
13  
14  
15

### 16 17 18 *Body composition analysis*

19  
20 Previous work in body composition by bio-electrical impedance in Ethiopian infants  
21 and children with SAM has shown that the conventional approach, predicting total  
22 body weight from height-adjusted impedance, fails due to confounding by oedema<sup>72</sup>.  
23  
24 The same project validated an alternative approach, known as Bio-electrical  
25 Impedance Vector Analysis (BIVA), and described significant differences between  
26 each of three groups: healthy controls, oedematous-SAM and non-oedematous  
27 SAM. Vector analysis splits impedance into two height-adjusted components,  
28 resistance and reactance, which are further linked through phase angle (PA).  
29  
30 Variability in these components is associated with biochemical parameters<sup>73</sup>. These  
31 variables will be explored using graphical analysis, or transformed into age- and sex-  
32 adjusted z-scores for statistical comparison, including longitudinal analyses. Higher  
33 phase angle indicates better nutritional status, while declining height-adjusted  
34 resistance over time indicates loss of oedema.  
35  
36  
37  
38  
39  
40  
41  
42  
43  
44  
45  
46  
47

### 48 *Enteropathy substudy*

49  
50 The primary comparison for the enteropathy substudy will be between children with  
51 HIV-SAM (group A) and SAM (group C), stratified by presence or absence of  
52 oedema. Control groups (B and D) are well-nourished children with or without HIV, to  
53 provide normative data for biomarkers. For each continuous outcome, simple  
54  
55  
56  
57  
58  
59  
60

1  
2  
3 descriptive analysis will be used to compare groups (HIV-SAM versus HIV, and HIV-  
4 SAM versus SAM) during hospitalisation using t-tests on appropriately transformed  
5 data. For any outcome with moderate ( $p < 0.05$ ) evidence of difference between either  
6 group a regression model will be constructed including groups A, B, C, D to directly  
7 test (using interactions) whether there is a synergistic effect of HIV-SAM versus SAM  
8 versus HIV versus neither. These models will also be used to explore whether there  
9 is any evidence for heterogeneity in effects between oedematous and non-  
10 oedematous SAM. Associations between enrolment factors (e.g. intestinal  
11 permeability and microbial translocation) will be explored using pairwise Spearman  
12 correlations and principal components analysis. Mean changes at the follow-up time-  
13 points in each group will be estimated, and groups compared (as above) using  
14 generalised estimating equations. For outcomes that differ across SAM groups over  
15 time, multilevel models will be used to explore possible predictors from the other  
16 factors measured. Time to nutritional recovery will be compared using Kaplan-Meier  
17 and log-rank tests.

#### 34 *Microbiota and metabolomics substudy*

35  
36 The primary comparison will be between HIV-uninfected children with oedematous  
37 and non-oedematous SAM, with a separate comparison between children with HIV-  
38 SAM and SAM. Analyses will examine: (i) differences in metagenomic/metabolomic  
39 variables between groups at each time-point; (ii) differences in  
40 metagenomic/metabolomic variables within groups over time; (iii) correlations  
41 between metagenomic and metabolomic variables; and (iv) correlations between  
42 metagenomic/metabolomic variables and clinical outcomes. A systematic analysis  
43 will be undertaken to reduce high-dimensional data, integrate the multi-omics  
44 datasets and minimise false discovery.

1  
2  
3 Compositional metagenomic data will be compared between groups for indices of  
4 alpha and beta diversity. Principal coordinate analysis and partial least squares  
5 discriminant analysis will be performed on metabolomics data to identify overall  
6 differences between groups. High-dimensional datasets will be reduced using  
7 random forest models to identify taxa, microbial gene families and metabolites that  
8 most strongly contribute to differences between groups, corrected by Benjamani-  
9 Hochburg false discovery rate detection. Targeted analysis by qRT-PCR will validate  
10 differential abundance or expression of candidate microbial genes. Longitudinal  
11 comparisons will be performed within and between groups using multilevel  
12 simultaneous component analysis. Orthogonal projections to latent structures models  
13 will integrate metabolomic and metagenomic data whilst linear regression, canonical  
14 correlation and hierarchal clustering analysis will measure correlations between -  
15 omics datasets. Finally, ROC analysis will identify the ability of different analytes to  
16 predict long-term nutritional and clinical outcomes.  
17  
18  
19  
20  
21  
22  
23  
24  
25  
26  
27  
28  
29  
30

### 31 32 *Immunology substudy* 33

34 Integrated profiles of innate immune cell function will be generated for each child  
35 using principal components analysis followed by hierarchical clustering<sup>74 75</sup>. This  
36 data-reduction method identifies whether absolute levels of specific markers or  
37 relative differences between markers differentiate children into groups. The resulting  
38 innate immune profiles will be compared between SAM, HIV-SAM and well-  
39 nourished groups using univariate tests and multivariate analysis of variance  
40 (MANOVA) of the principal components.  
41  
42  
43  
44  
45  
46  
47  
48  
49

50 To address the relationship between immune function and infections, regression  
51 analyses will determine whether baseline innate immune profiles (or the individual  
52 parameters defining them) are associated with the infectious morbidity or mortality  
53 during hospitalisation, using logistic models for binary outcomes and linear models  
54  
55  
56  
57  
58  
59  
60

1  
2  
3 for duration. Key clinical characteristics, including age, sex, oedema and baseline  
4 WHZ, will be added to models to investigate their confounding effects. Multivariate  
5 stacked regression methods will be used to compare the impact of different factors  
6 on severe bacterial infections based on heterogeneity tests.  
7  
8  
9

10  
11  
12 To determine whether treatment for SAM restores innate immune cell antibacterial  
13 function, mixed effects regression models will compare longitudinal changes in  
14 individual immune parameters, and the principal components calculated from the  
15 weights identified at baseline (which include healthy controls). Similarities and  
16 differences in longitudinal immune profiles will be compared between groups using  
17 nonmetric multi-dimensional scaling<sup>74 76 77</sup>. This approach will group children  
18 according to their composite innate immune function, allowing the duration and  
19 variability of immune restoration to be evaluated over the course of nutritional  
20 rehabilitation. Binary logistic regression will determine whether innate immune  
21 profiles at discharge are associated with morbidity or mortality during follow-up.  
22  
23  
24  
25  
26  
27  
28  
29  
30  
31  
32  
33

### 34 **PATIENT AND PUBLIC INVOLVEMENT**

35  
36 Patients and their caregivers were not involved in the design of the study. During  
37 recruitment, all caregivers of children admitted to hospital were given information  
38 about the study; those whose children had severe acute malnutrition were  
39 approached to give written informed consent. A meeting to disseminate results of the  
40 study to participants and their caregivers will be held at the end of the study. An  
41 interactive game to engage caregivers in the science underlying malnutrition is being  
42 developed in collaboration with experts from the Centre of the Cell, a unique science  
43 education centre based at Queen Mary University of London  
44  
45  
46  
47  
48  
49  
50  
51  
52 (<https://www.centreofthecell.org/>).  
53  
54  
55  
56  
57  
58  
59  
60



### **SAFETY REPORTING**

For all adverse events, the study team will assess expectedness and relatedness to study activities. Since this is an observational study without interventions, we anticipate that the risk is minimal; however, serious adverse events will be reported to local ethical review boards (Medical Research Council of Zimbabwe, and University of Zambia Biomedical Research Ethics Committee) and the study sponsor (Queen Mary University of London) according to their respective guidelines.

### **DATA COLLECTION AND MONITORING**

Clinical and demographic data are recorded on paper case report forms. All data are checked for completeness and plausibility before data entry and problems flagged for resolution by the clinical team. All data are double-entered onto a dedicated password-protected study database, and any discrepancies resolved. Study participants are identified on electronic databases only by study numbers (assigned at enrolment); no personal identifiers are entered.

### **ETHICS AND DISSEMINATION**

The study complies with the principles of the Declaration of Helsinki (2008) and is conducted in compliance with the principles of Good Clinical Practice (GCP) and local regulatory requirements in each country. Ethical approval was obtained from the University of Zambia Biomedical Research Ethics Committee, the Joint Research Ethics Committee of the University of Zimbabwe and the Medical Research Council of Zimbabwe. The ethical review board of the Sponsor, Queen Mary University of London, provided an advisory review of the study. Since this is an observational study, there is no Data and Safety Monitoring Board.

1  
2  
3 Results will be disseminated through conference abstracts and peer-reviewed  
4 publications and discussed with relevant policymakers and programmers. Study  
5 findings will be disseminated to families of participants at face-to-face meetings.  
6  
7  
8  
9

## 10 **TIME FRAME AND STUDY STATUS**

11 Enrolment into the study began in July 2016 and is expected to end in March 2018.  
12  
13 All participants will be followed for 48 weeks, with an expected study completion date  
14 of March 2019.  
15  
16  
17  
18  
19

## 20 **DISCUSSION**

21 HOPE-SAM aims to document the short- and long-term outcomes of children with  
22 SAM and HIV-SAM, and to identify the factors at presentation and at discharge from  
23 hospital that independently predict these outcomes. Mechanistic substudies aim to  
24 evaluate the contribution of enteropathy, microbiota, metabolome and innate immune  
25 cell function to these clinical outcomes. The prevalence of malnutrition in HIV-  
26 infected children is as high as 40% in some settings and the challenges of managing  
27 this population are well recognised<sup>78</sup>. The WHO protocol on management of SAM  
28 aims to reduce case fatality below 10%, but rates as high as 35% are still reported  
29 among HIV-infected children<sup>79 80</sup>. No studies have systematically and longitudinally  
30 collected morbidity data in HIV-SAM, or documented repeat hospitalisations and  
31 mortality after discharge from hospital, particularly in the current era where ART is  
32 available upon diagnosis. HOPE-SAM will provide a unique opportunity to enrol and  
33 follow a cohort of children managed for SAM in three large hospitals across two sub-  
34 Saharan African countries at several time-points over a one-year period. Nested  
35 longitudinal laboratory substudies aim to better characterise the pathogenesis of  
36 SAM and HIV-SAM, to determine whether pathogenic processes are normalised  
37 during nutritional rehabilitation and follow-up, and to identify potential mechanistic  
38 pathways for new intervention approaches.  
39  
40  
41  
42  
43  
44  
45  
46  
47  
48  
49  
50  
51  
52  
53  
54  
55  
56  
57  
58  
59  
60

## ACKNOWLEDGEMENTS

Members of the HOPE-SAM study team not listed in the author list: *Harare, Zimbabwe*: Virginia Sauramba, Adlight Dandadzi, Chipu Kureva, Johnson Mushonga, Eddington Mpofo, Washington Dune, Tafadzwa Chidhanguro, Sibongile Nkiwane, Sandra Rukobo, Margaret Govha, Patience Mashayanembwa, Leah Chidamba, Bernard Chasekwa, Joice Tome, Rachel Makasi, Wellington Murenjekekwa, Theodore Chidawanyika, Blessing Tsenesa, Stephen Moyo, Penias Nyamwino, Pururudzai Simango, Shepherd Seremwe, Lovemore Chingaoma and Sarudzai Kasaru. *Lusaka, Zambia*: Andreck Tembo, Mary Mpundu, Evelyn Nyendwa, Gwendolyn Nayame, Dalitso Tembo, Sophreen Mwaba, Esther Chilala, Lucy Macwani, Tenzeni Dumba, Miyoba Chipunza, Lydia Kazhila, Temwaninge Gondwe, Dennis Phiri, Mpala Mwanza, Kanekwa Zyambo.

We thank Philippa Rambanepasi, Karen Gwanzura and Agatha Muyenga for financial management of the study; Zinah Sorefan and Daniela Azurunwa for study coordination at Queen Mary University of London; Professor Kim Michaelsen for the use of the electronic knemometers and advice on their use; and we remember the hard work of Edith Mukusho who sadly passed away during the HOPE-SAM study. We thank the staff and management and members of the Department of Paediatrics and Child Health at the three hospital sites who have made this study possible. We are indebted to the caregivers, families and children who are participating in the HOPE-SAM study.

## **AUTHOR CONTRIBUTIONS**

*Designed study:* MB-D, BA, CDB, RCR, BM, KC, CK, KCh, DN, PC, NC, FM, JW,

ARM, JS, ASW, KJN, PK, AJP

*Sought funding:* MB-D, BA, CDB, RCR, JHH, ARM, JS, ASW, KJN, PK, AJP

*Undertaking study:* BM, KC, CK, KCh, FM, DN, PC, NC, FM, IM, EB, KM, SM, TR

*Study oversight:* MB-D, BA, JHH, KJN, PK, AJP

*Analysis:* MB-D, BA, CDB, RCR, RN, JW, ARM, JS, ASW, KJN, PK, AJP

*Wrote first draft of manuscript:* MB-D, CDB, RCR, AJP

*Critically revised manuscript:* All

## **FUNDING**

This work was supported by the Medical Research Council UK (MR/K012711/1), the Wellcome Trust (107634/Z/15/Z to MB-D; 206225/Z/17/Z to CDB, an award funded in partnership with the Royal Society; 206455/Z/17/Z to RCR; and 108065/Z/15/Z to AJP), and a Bio-Resource Grant from the Centre for Genomic Health within the Life Sciences Initiative at Queen Mary University of London.

## **COMPETING INTERESTS**

None of the authors have any competing interests to declare.

## REFERENCES

1. Black R E, Victora C G, Walker S P, et al. Maternal and child undernutrition and overweight in low-income and middle-income countries. *Lancet* 2013;382:427–51.
2. World Health Organisation G. Guideline Updates on the management of severe acute malnutrition in infants and children: World Health Organisation, Geneva, 2013.
3. Lenters LM, Wazny K, Webb P, et al. Treatment of severe and moderate acute malnutrition in low- and middle-income settings: a systematic review, meta-analysis and Delphi process. *BMC Public Health* 2013;13 (Supp 3):S23.
4. Golden MHN. Oedematous malnutrition. *British Medical Bulletin* 1998;54(2):433-44.
5. Schofield C, A. A. Why have mortality rates for severe malnutrition remained so high? *Bull World Health Organ* 1996;74(2):223-29.
6. Munthali T, Jacobs C, Sitali L, et al. Mortality and morbidity patterns in under-five children with severe acute malnutrition (SAM) in Zambia: a five-year retrospective review of hospital-based records (2009–2013). *Archives of Public Health* 2015;73(23)
7. Preidis G A, McCollum E D, Mwansambo C, et al. Pneumonia and Malnutrition are Highly Predictive of Mortality among African Children Hospitalized with Human Immunodeficiency Virus Infection or Exposure in the Era of Antiretroviral Therapy. *Journal of Pediatrics* 2011;159(3):484-89.
8. World Health Organisation G. Global guidance on criteria and processes for validation: Elimination of Mother-to-Child transmission of HIV and Syphilis. Geneva: World Health Organization, 2017.
9. Ceri E, Jones C-E, AJ. P. HIV-exposed, uninfected infants: new global challenges in the era of paediatric HIV elimination. *Lancet Infectious Diseases* 2016 doi: 10.1016/S1473

10. Heikens GT, Bunn J, Amadi A, et al. Case management of HIV-infected severely malnourished children: challenges in the area of highest prevalence. *Lancet* 2008;371:1305-7.
11. Heikens GT, Bunn J, Amadi B, et al. Case management of HIV-infected severely malnourished children: challenges in the area of highest prevalence. *Lancet* 2008;371(9620):1305-7.
12. Kerac M, Bunn J, George Chagaluka G, et al. Follow-Up of Post-Discharge Growth and Mortality after Treatment for Severe Acute Malnutrition (FuSAM Study): A Prospective Cohort Study. *Plos One* 2014;9(6)
13. Lelijveld M, Seal A, Wells J C, et al. Chronic disease outcomes after severe acute malnutrition in Malawian children (ChroSAM): a cohort study. *Lancet Global Health* 2016;4:e654-62.
14. Moisi JC, Gatakaa H, Berkley JA, et al. Excess child mortality after discharge from hospital in Kilifi, Kenya: a retrospective cohort analysis. *Bull World Health Organ* 2011;89:725-32A.
15. Wiens MO, Pawluk S, Kissoon N, et al. Pediatric Post-Discharge Mortality in Resource Poor Countries: A Systematic Review. *Plos One* 2013;8(6)
16. Fergusson P, Chinkhumba J, Grijalva-Eternod C, et al. Nutritional recovery in HIV-infected and HIVuninfected children with severe acute malnutrition. *Archives of Diseases in Children* 2009;94:512-16.
17. DeBoer M D, Lima A A M, Oria R B, et al. Early childhood growth failure and the developmental origins of adult disease: Do enteric infections and malnutrition increase risk for the metabolic syndrome? *Nutrition Reviews* 2012 70(11):642-53.
18. Barouki R, Gluckman P D, Grandjean P, et al. Developmental origins of non-communicable disease: Implications for research and public health. *Environmental Health* 2012;11(42)

- 1  
2  
3 19. Davey Smith G, Greenwood R, Gunnell D, et al. Leg length, insulin resistance,  
4 and coronary heart disease risk: The Caerphilly Study. *Journal of Epidemiology*  
5 *Community Health* 2001;55:867-72.  
6  
7  
8 20. Gunnell D, Whitley E, Upton MN, et al. Associations of height, leg length, and  
9 lung function with cardiovascular risk factors in the Midspan Family Study. *Journal of*  
10 *Epidemiology Community Health* 2002;57:141-46.  
11  
12  
13 21. Jones K D, Thitiri J, Ngari M, et al. Childhood malnutrition: Toward an  
14 understanding of infections, inflammation, and antimicrobials. *Food and Nutrition*  
15 *Bulletin* 2014;35(2)  
16  
17  
18 22. Attia S, Versloot CJ, Voskuil W, et al. Mortality in children with complicated  
19 severe acute malnutrition is related to intestinal and systemic inflammation: an  
20 observational cohort study. *American Journal of Clinical Nutrition* 2016;104:1441-9.  
21  
22  
23 23. Bourke CD, Berkley J A, A. P. Immune Dysfunction as a Cause and  
24 Consequence of Malnutrition. *Trends in Immunology* 2016;37(6):386-89.  
25  
26  
27 24. Smith MI, Yatsunenko T, Manary MJ, et al. Gut microbiomes of Malawian twin  
28 pairs discordant for kwashiorkor. *Science* 2013;339(6119):548-54.  
29  
30  
31 25. Di Giovanni V, Bourdon C, Wang DX, et al. Metabolomic Changes in Serum of  
32 Children with Different Clinical Diagnoses of Malnutrition. *Journal of Nutrition*  
33 2016;146:2436-44.  
34  
35  
36 26. Rytter MJH, Kolte L, Briend A, et al. The Immune System in Children with  
37 Malnutrition—A Systematic Review. *Plos One* 2014;9(8)  
38  
39  
40 27. Smith MI, Yatsunenko T, Manary MJ, et al. Gut microbiomes of Malawian twin  
41 pairs discordant for kwashiorkor. *Science (New York, NY)* 2013;339(6119):548-54.  
42  
43  
44 28. Blanton LV, Charbonneau MR, Salih T, et al. Gut bacteria that prevent growth  
45 impairments transmitted by microbiota from malnourished children. *Science*  
46 2016;351(6275)  
47  
48  
49 29. Subramanian S, Huq S, Yatsunenko T, et al. Persistent gut microbiota immaturity  
50 in malnourished Bangladeshi children. *Nature* 2014;510(7505):417-21.  
51  
52  
53  
54  
55  
56  
57  
58  
59  
60

- 1  
2  
3 30. Prendergast A, Kelly P. Review: Enteropathies in the developing world:  
4 neglected effects on global health. *Am J Trop Med Hyg* 2012;86:756-63.  
5  
6  
7 31. Lutwama F, Kagina BM, Wajja A, et al. Distinct T-Cell Responses When BCG  
8 Vaccination Is Delayed From Birth to 6 Weeks of Age in Ugandan Infants. *The*  
9 *Journal of Infectious Diseases* 2014;209(6):887-97.  
10  
11  
12 32. Prendergast AJ, Humphrey JH, Mutasa K, et al. Assessment of Environmental  
13 Enteric Dysfunction in the SHINE Trial: Methods and Challenges. *Clin Infect Dis*  
14 2015;61 (suppl 7):S685-702.  
15  
16  
17 33. World Health Organization. Management of severe malnutrition: a manual for  
18 physicians and other senior health workers. WHO, Geneva, 1999. Available  
19 at <http://www.who.int/nutrition/publications/severemalnutrition/9241545119/en/>.  
20  
21  
22 34. World Health Organization. Consolidated guidelines on the use of antiretroviral  
23 drugs for treating and preventing HIV infection: Recommendations for a public health  
24 approach. WHO, Geneva, 2003. Available at  
25 <http://www.who.int/hiv/pub/guidelines/arv2013/download/en/>.  
26  
27  
28 35. Costiniuk CT, JB. A. Human immunodeficiency virus and the gastrointestinal  
29 immune system: does highly active antiretroviral therapy restore gut immunity?  
30 *Nature* 2012;5(6):596-604.  
31  
32  
33 36. Brenchley JM, Douek DC. HIV infection and the gastrointestinal immune  
34 system. *Nature* 2008;1(1) doi: doi:10.1038/mi.2007.1  
35  
36  
37 37. Amadi B, Besa E, Zyambo K, et al. Impaired Barrier Function and Autoantibody  
38 Generation in Malnutrition Enteropathy in Zambia. *EBioMedicine*  
39 2017;22(Supplement C):191-99. doi: <https://doi.org/10.1016/j.ebiom.2017.07.017>  
40  
41  
42 38. Kau AL, Ahern PP, Griffin NW, et al. Human nutrition, the gut microbiome and the  
43 immune system. *Nature* 2011;474(7351):327-36.  
44  
45  
46 39. Blanton LV, Charbonneau MR, Salih T, et al. Gut bacteria that prevent growth  
47 impairments transmitted by microbiota from malnourished children. *Science*  
48 2016;351(6275) doi: 10.1126/science.aad3311  
49  
50  
51  
52  
53  
54  
55  
56  
57  
58  
59  
60



- 1  
2  
3 40. Kau AL, Planer JD, Liu J, et al. Functional characterization of IgA-targeted  
4 bacterial taxa from undernourished Malawian children that produce diet-dependent  
5 enteropathy. *Sci Transl Med* 2015;7(276):276ra24. doi:  
6  
7 10.1126/scitranslmed.aaa4877  
8  
9  
10 41. Subramanian S, Huq S, Yatsunenkov T, et al. Persistent gut microbiota immaturity  
11 in malnourished Bangladeshi children. *Nature* 2014;510(7505):417-21. doi:  
12  
13 10.1038/nature13421  
14  
15 42. Monaco CL, Gootenberg DB, Zhao G, et al. Altered Virome and Bacterial  
16 Microbiome in Human Immunodeficiency Virus-Associated Acquired  
17 Immunodeficiency Syndrome. *Cell Host Microbe* 2016;19(3):311-22. doi:  
18  
19 10.1016/j.chom.2016.02.011  
20  
21 43. Amadi B, Fagbemi AO, Kelly P, et al. Reduced production of sulfated  
22 glycosaminoglycans occurs in Zambian children with kwashiorkor but not marasmus.  
23  
24 *Am J Clin Nutr* 2009;89(2):592-600. doi: 10.3945/ajcn.2008.27092  
25  
26 44. Segata N, Waldron L, Ballarini A, et al. Metagenomic microbial community  
27 profiling using unique clade-specific marker genes. *Nature methods* 2012;9(8):811-4.  
28  
29 doi: 10.1038/nmeth.2066  
30  
31 45. Abubucker S, Segata N, Goll J, et al. Metabolic reconstruction for metagenomic  
32 data and its application to the human microbiome. *PLoS computational biology*  
33  
34 2012;8(6):e1002358. doi: 10.1371/journal.pcbi.1002358  
35  
36 46. Bartz S, Mody A, Hornik C, et al. Severe Acute Malnutrition in Childhood:  
37 Hormonal and Metabolic Status at Presentation, Response to Treatment and  
38 Predictors of Mortality. *Journal of Clinical and Endocrine Metabolism*  
39  
40 2014;99(6):2128-37.  
41  
42 47. Farras M, Chandwe K, Mayneris-Perxachs J, et al. Characterizing the metabolic  
43 phenotype of intestinal villus blunting in Zambian children with severe acute  
44 malnutrition and persistent diarrhoea. *Plos One* 2018, in press  
45  
46  
47  
48  
49  
50  
51  
52  
53  
54  
55  
56  
57  
58  
59  
60

- 1  
2  
3 48. Mayneris-Perxachs J, Lima AA, Guerrant RL, et al. Urinary N-methylnicotinamide  
4 and  $\beta$ -aminoisobutyric acid predict catch-up growth in undernourished Brazilian  
5 children. *Sci Rep* 2016;6:19780. doi: 10.1038/srep19780  
6  
7  
8 49. Manary MJ, Leeuwenburgh C, Heinecke JW. Increased oxidative stress in  
9 kwashiorkor. *J Pediatr* 2000;137(3):421-4.  
10  
11 50. Attia S, Versloot CJ, Voskuil W, et al. Mortality in children with complicated  
12 severe acute malnutrition is related to intestinal and systemic inflammation: an  
13 observational cohort study. *The American Journal of Clinical Nutrition* 2016 doi:  
14 10.3945/ajcn.116.130518  
15  
16 51. Chisti MJ, Salam MA, Bardhan PK, et al. Severe Sepsis in Severely  
17 Malnourished Young Bangladeshi Children with Pneumonia: A Retrospective Case  
18 Control Study. *PLoS ONE* 2015;10(10):e0139966. doi:  
19 10.1371/journal.pone.0139966  
20  
21 52. Page A-L, de Rekeneire N, Sayadi S, et al. Infections in Children Admitted with  
22 Complicated Severe Acute Malnutrition in Niger. *PLoS ONE* 2013;8(7):e68699. doi:  
23 10.1371/journal.pone.0068699  
24  
25 53. Jones KDJ, Berkley JA. Severe acute malnutrition and infection. *Paediatrics &*  
26 *International Child Health* 2014;34(Suppl 1):1-29. doi:  
27 10.1179/2046904714Z.000000000218  
28  
29 54. Bahwere P, Levy J, Hennart P, et al. Community-acquired bacteremia among  
30 hospitalized children in rural Central Africa. *International Journal of Infectious*  
31 *Diseases* 2001;5(4):180-88.  
32  
33 55. Thuo N, Ohuma E, Karisa J, et al. The prognostic value of dipstick urinalysis in  
34 children admitted to hospital with severe malnutrition. *Arch Dis Child* 2010;95(6):422-  
35 6.  
36  
37 56. Berkley JA, Lowe BS, Mwangi I, et al. Bacteremia among Children Admitted to  
38 a Rural Hospital in Kenya. *New England Journal of Medicine* 2005;352(1):39-47.  
39  
40  
41  
42  
43  
44  
45  
46  
47  
48  
49  
50  
51  
52  
53  
54  
55  
56  
57  
58  
59  
60

- 1  
2  
3 57. Chang CY, Trehan I, Wang RJ, et al. Children Successfully Treated for Moderate  
4 Acute Malnutrition Remain at Risk for Malnutrition and Death in the Subsequent Year  
5 after Recovery. *The Journal of nutrition* 2013;143(2):215-20.  
6  
7  
8 58. Kerac M, Bunn J, Chagaluka G, et al. Follow-Up of Post-Discharge Growth and  
9 Mortality after Treatment for Severe Acute Malnutrition (FuSAM Study): A  
10 Prospective Cohort Study. *PLoS ONE* 2014;9(6):e96030. doi:  
11  
12  
13  
14 10.1371/journal.pone.0096030  
15  
16 59. Berkley JA, Ngari M, Thitiri J, et al. Daily co-trimoxazole prophylaxis to prevent  
17 mortality in children with complicated severe acute malnutrition: a multicentre,  
18 double-blind, randomised placebo-controlled trial. *The Lancet Global Health*  
19  
20  
21  
22 2016;4(7):e464-e73. doi: 10.1016/S2214-109X(16)30096-1  
23  
24 60. Bourke CD, Berkley JA, Prendergast AJ. Immune Dysfunction as a Cause and  
25 Consequence of Malnutrition. *Trends Immunol* 2016 doi: 10.1016/j.it.2016.04.003  
26  
27  
28 61. Rytter MJ, Kolte L, Briend A, et al. The immune system in children with  
29 malnutrition--a systematic review. *PLoS One* 2014;9(8):e105017.  
30  
31  
32 62. Ibrahim MK, Zambruni M, Melby CL, et al. Impact of Childhood Malnutrition on  
33 Host Defense and Infection. *Clinical Microbiology Reviews* 2017;30(4):919-71.  
34  
35  
36 63. Bartz S, Mody A, Hornik C, et al. Severe acute malnutrition in childhood:  
37 hormonal and metabolic status at presentation, response to treatment, and predictors  
38 of mortality. *Journal of Clinical Endocrinology & Metabolism* 2014;99(6):2128-37.  
39  
40  
41 64. Hughes SM, Amadi B, Mwiya M, et al. Dendritic cell anergy results from  
42 endotoxemia in severe malnutrition. *Journal of immunology* 2009;183(4):2818-26.  
43  
44  
45 65. Jones KD, Hunten-Kirsch B, Laving AM, et al. Mesalazine in the initial  
46 management of severely acutely malnourished children with environmental enteric  
47 dysfunction: a pilot randomized controlled trial. *BMC Medicine* 2014;12:133. doi:  
48  
49  
50  
51  
52 10.1186/s12916-014-0133-2  
53  
54  
55  
56  
57  
58  
59  
60

- 1  
2  
3 66. Prendergast A, Kelly P. Enteropathies in the developing world: neglected effects  
4 on global health. *American Journal of Tropical Medicine & Hygiene* 2012;86(5):756-  
5  
6 63.  
7  
8 67. Watanabe K, Petri WA, Jr. Environmental Enteropathy: Elusive but Significant  
9 Subclinical Abnormalities in Developing Countries. *EBioMedicine* 2016 doi:  
10  
11 10.1016/j.ebiom.2016.07.030  
12  
13 68. Kelly P, Besa E, Zyambo K, et al. Endomicroscopic and Transcriptomic Analysis  
14 of Impaired Barrier Function and Malabsorption in Environmental Enteropathy. *PLoS*  
15  
16  
17  
18  
19  
20  
21 69. Behrens RH, Lunn PG, Northrop CA, et al. Factors affecting the integrity of the  
22 intestinal mucosa of Gambian children. *American Journal of Clinical Nutrition*  
23  
24 1987;45:1433-41.  
25  
26 70. Di Giovanni V, Bourdon C, Wang DX, et al. Metabolomic Changes in Serum of  
27 Children with Different Clinical Diagnoses of Malnutrition. *J Nutr* 2016 doi:  
28  
29 10.3945/jn.116.239145  
30  
31 71. Borm GF, Fransen J, Lemmens WA. A simple sample size formula for analysis of  
32 covariance in randomized clinical trials. *J Clin Epidemiol* 2007;60(12):1234-8.  
33  
34 72. Girma T, Kæstel P, Workeneh N, et al. Bioimpedance index for measurement of  
35 total body water in severely malnourished children: Assessing the effect of nutritional  
36 oedema. *Clinical Nutrition* 2015  
37  
38 73. Girma T, Hother Nielsen AL, Kæstel P, et al. Biochemical and anthropometric  
39 correlates of bio-electrical impedance parameters in severely malnourished children:  
40 A cross-sectional study. *Clinical Nutrition* 2017 doi: 10.1016/j.clnu.2017.02.017  
41  
42 74. Bourke CD, Nausch N, Rujeni N, et al. Integrated Analysis of Innate, Th1, Th2,  
43 Th17, and Regulatory Cytokines Identifies Changes in Immune Polarisation  
44 Following Treatment of Human Schistosomiasis. *The Journal of Infectious Diseases*  
45 2013;208(1):159-69.  
46  
47  
48  
49  
50  
51  
52  
53  
54  
55  
56  
57  
58  
59  
60

- 1  
2  
3 75. Prendergast AJ, Szubert AJ, Berejena C, et al. Baseline Inflammatory  
4 Biomarkers Identify Subgroups of HIV-Infected African Children With Differing  
5 Responses to Antiretroviral Therapy. *Journal of Infectious Diseases* 2016;214:226-36  
6  
7  
8  
9  
10  
11 76. Bourke CD, Mutapi F, Nausch N, et al. Trichuris suis ova therapy for allergic  
12 rhinitis does not affect allergen-specific cytokine responses despite a parasite-  
13 specific cytokine response. *Clinical and Experimental Allergy* 2012;42:1582-95.  
14  
15 77. Bourke CD, Nausch N, Rujeni N, et al. Cytokine Responses to the Anti-  
16 schistosome Vaccine Candidate Antigen Glutathione-S-transferase Vary with Host  
17 Age and Are Boosted by Praziquantel Treatment. *Plos Neglected Tropical Diseases*  
18 2014;8(5)  
19  
20 78. Fergusson P, A. T. HIV prevalence and mortality among children undergoing  
21 treatment for severe acute malnutrition in sub-Saharan Africa: a systematic review  
22 and meta-analysis. *Transactions of the Royal Society of Tropical Medicine and*  
23 *Hygiene* 2009;103(6):541-48.  
24  
25 79. Schofield C, A. A. Why have mortality rates for severe malnutrition remained so  
26 high? *Bulletin of the World Health Organization* 1996;74(2):223-29.  
27  
28 80. Chinkhumba J, Tomkins A, Banda C, et al. The impact of HIV on mortality during  
29 in-patient rehabilitation of severely malnourished children in Malawi. *Transactions of*  
30 *the Royal Society of Tropical Medicine and Hygiene* 2008;102(7):639-44.  
31  
32  
33  
34  
35  
36  
37  
38  
39  
40  
41  
42  
43  
44  
45  
46  
47  
48  
49  
50  
51  
52  
53  
54  
55  
56  
57  
58  
59  
60

## FIGURE LEGENDS

### Figure 1: Study flow chart.

All hospital admissions are screened for eligibility for the observational cohort and enteropathy substudy, with procedures undertaken as shown in the flow chart during hospitalisation and post-discharge. Well-nourished children from outpatient clinics meeting eligibility criteria as healthy controls are enrolled and undergo a single baseline assessment as shown.

For peer review only

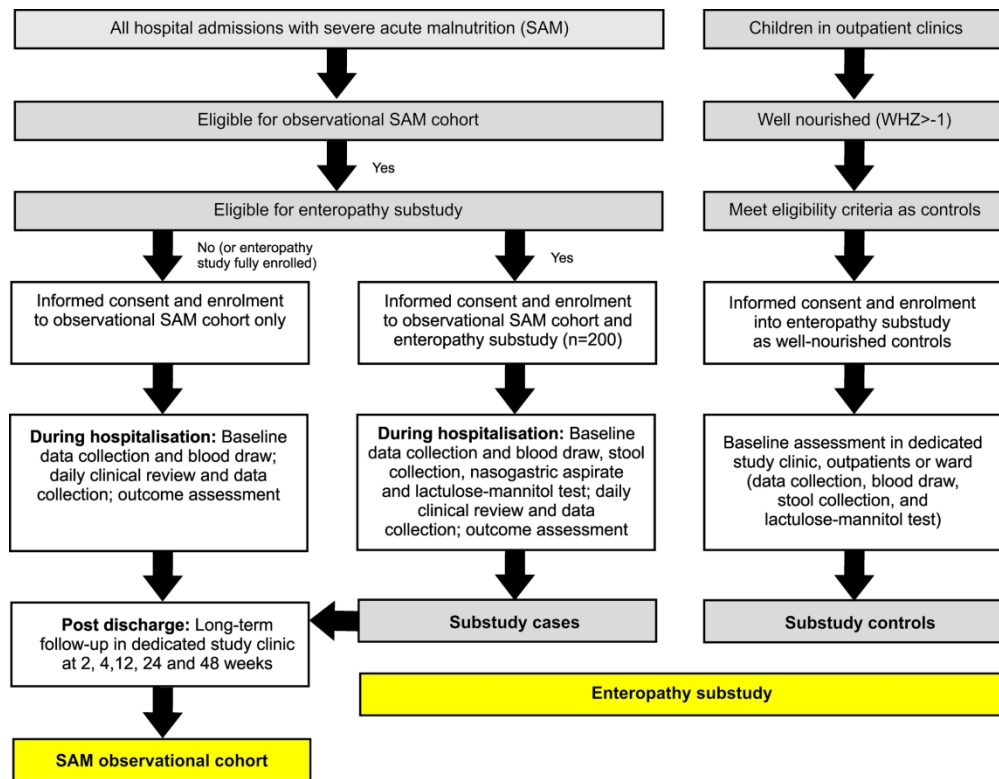

197x152mm (300 x 300 DPI)

**Supplementary Table 1: Assays undertaken on stored samples for children in the observational cohort.**

| Sample type | Assay (method)                                                                                                             | Location of work                    | Study subjects        | Time-points                        |
|-------------|----------------------------------------------------------------------------------------------------------------------------|-------------------------------------|-----------------------|------------------------------------|
| Blood       | HIV testing (rapid antibody test algorithm if >18 mo old or HIV DNA PCR <18 mo old) <sup>1</sup>                           | TROPGAN, Zvitambo or clinical sites | All                   | Baseline                           |
| Blood       | CD4 count (flow cytometry or PIMA) <sup>1</sup>                                                                            | TROPGAN, Zvitambo or clinical sites | All HIV-positive      | Baseline, wk 12, 24, 48            |
| Plasma      | HIV viral load (real-time PCR) <sup>1</sup>                                                                                | TROPGAN, Zvitambo or clinical sites | All HIV-positive      | Baseline, wk 12, 24, 48            |
| Plasma      | C-reactive protein (ELISA)                                                                                                 | TROPGAN, Zvitambo                   | All                   | Baseline, discharge, wk 12, 24, 48 |
| Plasma      | Albumin (ELISA)                                                                                                            | TROPGAN, Zvitambo                   | All                   | Baseline, discharge, wk 12, 24, 48 |
| Plasma      | Lipopolysaccharide (LAL assay)                                                                                             | TROPGAN and Zvitambo                | Subgroup <sup>3</sup> | Baseline, discharge, wk 12, 24, 48 |
| Plasma      | Lipopolysaccharide binding protein (LBP)                                                                                   | TROPGAN and Zvitambo                | Subgroup <sup>3</sup> | Baseline, discharge, wk 12, 24, 48 |
| Plasma      | sCD14 (ELISA)                                                                                                              | TROPGAN and Zvitambo                | Subgroup <sup>3</sup> | Baseline, discharge, wk 12, 24, 48 |
| Plasma      | sCD163 (ELISA)                                                                                                             | TROPGAN and Zvitambo                | Subgroup <sup>3</sup> | Baseline, discharge, wk 12, 24, 48 |
| Plasma      | IL-6, TNF-alpha, IL-1 $\beta$ (ELISA) and/or multiplex cytokines                                                           | TROPGAN and Zvitambo                | Subgroup <sup>3</sup> | Baseline, discharge, wk 12, 24, 48 |
| Plasma      | Total PAMP activity (THP1 reporter cell line <sup>2</sup> )                                                                | TROPGAN and Zvitambo                | Subgroup <sup>3</sup> | Baseline, discharge, wk 12, 24, 48 |
| Whole blood | Molecular techniques for bacterial detection (broad-range and specific PCR and next-generation sequencing)                 | QMUL, London <sup>2</sup>           | Subgroup <sup>3</sup> | Baseline, discharge, wk 12, 24, 48 |
| Whole blood | <i>In vitro</i> binding to bacterial products, cytokine expression and cellular responses to PAMP stimulation <sup>4</sup> | TROPGAN, Zvitambo                   | All                   | Baseline, discharge, wk 12, 24, 48 |
| Plasma      | Co-culture with healthy immune cells <sup>5</sup>                                                                          | Blizard Institute                   | All                   | Baseline, discharge, wk 12, 24, 48 |



1  
2  
3 <sup>1</sup>If HIV test, CD4 and viral load have already been conducted as part of routine clinical care, they  
4 will not be repeated on the research sample.

5 <sup>2</sup>THP1 reporter cells are derived from THP1, a human monocytic cell line that naturally expresses  
6 many pattern recognition receptors (PRR). The cell line stably expresses an NF-κB/AP-1  
7 inducible reporter (SEAP) system to facilitate the monitoring of PRR-induced NF-κB/AP-1  
8 activation.

9 <sup>3</sup>Assays will be undertaken in a subgroup of children, using a case-control or case-cohort design  
10 to evaluate the impact of biomarkers on immune activation and mortality.

11 <sup>4</sup>Whole blood will be stimulated with pathogen-associated molecular patterns (PAMP) in culture  
12 plates and bacterial antigens labelled with fluorescent tags in test tubes, and incubated for 1-  
13 24hr. Supernatant will be removed and stored at -80C for subsequent analysis of pro- and anti-  
14 inflammatory cytokines, and cells will be fixed as described in section 12.2.2 for subsequent  
15 analysis of bacterial binding, cellular activation, proliferation and cytokine elaboration by flow  
16 cytometry.

17 <sup>5</sup>To determine the effect of the systemic milieu on healthy immune cell function, plasma samples  
18 will be transported to the Blizzard Institute and co-cultured with healthy immune cells, which will be  
19 functionally analysed via multi-parameter flow cytometry in the Flow Cytometry Core Facility.

20 IFABP: Intestinal fatty acid binding protein; ELISA: Enzyme-linked immunosorbent assay; GLP-2:  
21 glucagon-like peptide 2; sCD14: soluble CD14; sCD163: soluble CD163; PAMP: pathogen-  
22 associated molecular pattern; QMUL: Queen Mary University of London; CRP: C-reactive protein;  
23 LAL: limulus amoebocyte lysate assay.  
24  
25  
26  
27  
28  
29  
30  
31  
32  
33  
34  
35  
36  
37  
38  
39  
40  
41  
42  
43  
44  
45  
46  
47  
48  
49  
50  
51  
52  
53  
54  
55  
56  
57  
58  
59  
60

**Supplementary table 2: Additional laboratory analyses for enteropathy substudy**

| Sample type                      | Assay (method)                                                                                                         | Location of work                     | Study groups <sup>1</sup>         | Time-points                           |
|----------------------------------|------------------------------------------------------------------------------------------------------------------------|--------------------------------------|-----------------------------------|---------------------------------------|
| Urine                            | Lactulose-mannitol ratio (mass spectrometry)                                                                           | Orgeon Analytics, USA <sup>2</sup>   | A, B, C, D (all)                  | Baseline, discharge, wk 12 and 48     |
| Stool                            | Neopterin, myeloperoxidase, alpha-1 antitrypsin and REG-1B (ELISA)                                                     | TROPGAN and Zvitambo                 | A, B, C, D (all)                  | Baseline, discharge, wk 12, 24, 48    |
| Plasma                           | I-FABP (ELISA)                                                                                                         | TROPGAN and Zvitambo                 | A, B, C, D (all)                  | Baseline, discharge, wk 12, 24, 48    |
| Plasma                           | GLP-2                                                                                                                  | TROPGAN and Zvitambo                 | A, B, C, D (all)                  | Baseline, discharge, wk 12, 24, 48    |
| Plasma                           | Citrulline (mass spectrometry)                                                                                         | Imperial College London              | A, B, C, D (all)                  | Baseline, discharge, wk 12, 24, 48    |
| Plasma                           | Kynurenine:tryptophan ratio and metabolites along tryptophan pathway (mass spectrometry)                               | Imperial College London              | A, B, C, D (all)                  | Baseline, discharge, wk 12, 24, 48    |
| Stool                            | Microbiome analysis <sup>3</sup>                                                                                       | BCCDC, Vancouver <sup>2</sup>        | A, B, C, D (all)                  | Baseline, discharge, wk 12, 24, 48    |
| Stool                            | <i>Helicobacter pylori</i> antigen                                                                                     | TROPGAN and Zvitambo                 | A, B, C, D (all)                  | Baseline                              |
| Gastric juice                    | Culture and molecular techniques for bacterial detection (broad-range and specific PCR and next-generation sequencing) | QMUL, London <sup>2</sup>            | Subgroup of A, C (n=50 per group) | Baseline                              |
| RNA extracted from PAXGene tubes | Gene expression analysis (RNASeq)                                                                                      | QMUL, London <sup>2</sup>            | A, B, C, D (all)                  | Baseline and discharge                |
| Plasma and urine                 | Targeted and untargeted metabolic phenotyping                                                                          | Imperial College London <sup>2</sup> | A, B, C, D (all)                  | Baseline, discharge, wk 12, 24 and 48 |

1  
2  
3  
4 <sup>1</sup>Enteropathy substudy groups are shown in **Table 1**. Note that controls only have blood taken at  
5 baseline as per Table 4.

6 <sup>2</sup>Assay methodology not available in country. See section 12.1.4 for details of shipment to  
7 UK/USA/Canada.

8 <sup>3</sup>For microbiome analyses, total DNA and/or RNA will be extracted from stool samples and used  
9 as template for next generation sequencing library preparation and for quantitative polymerase  
10 chain reaction (qPCR), then sequenced via whole metagenome shotgun sequencing (see section  
11 12.3.3.2).

12 QMUL: Queen Mary University of London; BCCDC: British Columbia Centre for Disease Control.  
13  
14  
15  
16  
17  
18  
19  
20  
21  
22  
23  
24  
25  
26  
27  
28  
29  
30  
31  
32  
33  
34  
35  
36  
37  
38  
39  
40  
41  
42  
43  
44  
45  
46  
47  
48  
49  
50  
51  
52  
53  
54  
55  
56  
57  
58  
59  
60

# BMJ Open

## Health Outcomes, Pathogenesis and Epidemiology of Severe Acute Malnutrition (HOPE-SAM): rationale and methods of a longitudinal observational study

|                               |                                                                                                                                                                                                                                                                                                                                                                                                                                                                                                                                                                                                                                                                                                                                                                                                                                                                                                                                                                                                                                                                                                                                                                                                                                                                                                                                                                                                                                                                                                                                                                                                                                                                                                                                                                                                                                                                                                                                                                                                                                                                                                                                                                           |
|-------------------------------|---------------------------------------------------------------------------------------------------------------------------------------------------------------------------------------------------------------------------------------------------------------------------------------------------------------------------------------------------------------------------------------------------------------------------------------------------------------------------------------------------------------------------------------------------------------------------------------------------------------------------------------------------------------------------------------------------------------------------------------------------------------------------------------------------------------------------------------------------------------------------------------------------------------------------------------------------------------------------------------------------------------------------------------------------------------------------------------------------------------------------------------------------------------------------------------------------------------------------------------------------------------------------------------------------------------------------------------------------------------------------------------------------------------------------------------------------------------------------------------------------------------------------------------------------------------------------------------------------------------------------------------------------------------------------------------------------------------------------------------------------------------------------------------------------------------------------------------------------------------------------------------------------------------------------------------------------------------------------------------------------------------------------------------------------------------------------------------------------------------------------------------------------------------------------|
| Journal:                      | <i>BMJ Open</i>                                                                                                                                                                                                                                                                                                                                                                                                                                                                                                                                                                                                                                                                                                                                                                                                                                                                                                                                                                                                                                                                                                                                                                                                                                                                                                                                                                                                                                                                                                                                                                                                                                                                                                                                                                                                                                                                                                                                                                                                                                                                                                                                                           |
| Manuscript ID                 | bmjopen-2018-023077.R1                                                                                                                                                                                                                                                                                                                                                                                                                                                                                                                                                                                                                                                                                                                                                                                                                                                                                                                                                                                                                                                                                                                                                                                                                                                                                                                                                                                                                                                                                                                                                                                                                                                                                                                                                                                                                                                                                                                                                                                                                                                                                                                                                    |
| Article Type:                 | Protocol                                                                                                                                                                                                                                                                                                                                                                                                                                                                                                                                                                                                                                                                                                                                                                                                                                                                                                                                                                                                                                                                                                                                                                                                                                                                                                                                                                                                                                                                                                                                                                                                                                                                                                                                                                                                                                                                                                                                                                                                                                                                                                                                                                  |
| Date Submitted by the Author: | 03-Aug-2018                                                                                                                                                                                                                                                                                                                                                                                                                                                                                                                                                                                                                                                                                                                                                                                                                                                                                                                                                                                                                                                                                                                                                                                                                                                                                                                                                                                                                                                                                                                                                                                                                                                                                                                                                                                                                                                                                                                                                                                                                                                                                                                                                               |
| Complete List of Authors:     | <p>Bwakura-Dangarembizi, Mutsa; University of Zimbabwe College of Health Sciences, Paediatrics and Child Health</p> <p>Amadi, Beatrice; 2Tropical Gastroenterology and Nutrition Group, University of Zambia, Lusaka, Zambia</p> <p>Bourke, Claire ; Blizard Institute, Queen Mary University of London, UK</p> <p>Robertson, Ruairi; Blizard Institute, Queen Mary University of London, UK</p> <p>Mwapenya, Benjamin; Zvitambo Institute for Maternal and Child Health Research, Harare, Zimbabwe</p> <p>Chandwe, Kanta; Tropical Gastroenterology and Nutrition Group, University of Zambia, Lusaka, Zambia</p> <p>Kapoma, Chanda; Tropical Gastroenterology and Nutrition Group, University of Zambia, Lusaka, Zambia, Paediatrics; Livingstone Central Hospital, Paediatrics</p> <p>Chifunda, Kapula; Tropical Gastroenterology and Nutrition Group, University of Zambia, Lusaka, Zambia, paediatrics and child health</p> <p>Majo, Florence; Zvitambo Institute for Maternal and Child Health Research, Harare, Zimbabwe</p> <p>Ngosa, Deophine; Tropical Gastroenterology and Nutrition Group, University of Zambia, Lusaka, Zambia</p> <p>Chakara, Pamela; Zvitambo Institute for Maternal and Child Health Research, Harare, Zimbabwe</p> <p>Chulu, Nivea; 2Tropical Gastroenterology and Nutrition Group, University of Zambia, Lusaka, Zambia</p> <p>Masimba, Faithfull; Zvitambo Institute for Maternal and Child Health Research, Harare, Zimbabwe</p> <p>Mapurisa, Idah; Zvitambo Institute for Maternal and Child Health Research, Harare, Zimbabwe</p> <p>Besa, Ellen; Zvitambo Institute for Maternal and Child Health Research, Harare, Zimbabwe</p> <p>Mutasa, Kuda; Zvitambo Institute for Maternal and Child Health Research, Harare, Zimbabwe</p> <p>Mwakamui, Simutanyi; 2Tropical Gastroenterology and Nutrition Group, University of Zambia, Lusaka, Zambia</p> <p>Runodamoto, Thompson ; Zvitambo Institute for Maternal and Child Health Research, Harare, Zimbabwe</p> <p>Humphrey, Jean; Zvitambo Institute for Maternal and Child Health Research, Harare, Zimbabwe</p> <p>Ntozini, Robert; Zvitambo Institute, Biostatistics &amp; IT</p> |

1  
2  
3  
4  
5  
6  
7  
8  
9  
10  
11  
12  
13  
14  
15  
16  
17  
18  
19  
20  
21  
22  
23  
24  
25  
26  
27  
28  
29  
30  
31  
32  
33  
34  
35  
36  
37  
38  
39  
40  
41  
42  
43  
44  
45  
46  
47  
48  
49  
50  
51  
52  
53  
54  
55  
56  
57  
58  
59  
60

|                                   |                                                                                                                                                                                                                                                                                                                                                                                                           |
|-----------------------------------|-----------------------------------------------------------------------------------------------------------------------------------------------------------------------------------------------------------------------------------------------------------------------------------------------------------------------------------------------------------------------------------------------------------|
|                                   | Wells, Jonathan C. K.; UCL Great Ormond Street Institute of Child Health<br>Manges, Ameer; University of British Columbia<br>Swann, Jon; Imperial College London<br>Walker, Sarah; MRC Clinical Trials Unit at UCL<br>Nathoo, Kusum; University of Zimbabwe, College of Health Sciences<br>Kelly, Paul; Barts and The London School of Medicine<br>Prendergast, Andrew ; Queen Mary University of London, |
| <b>Primary Subject Heading:</b>   | Global health                                                                                                                                                                                                                                                                                                                                                                                             |
| <b>Secondary Subject Heading:</b> | Epidemiology, Nutrition and metabolism, Paediatrics, Immunology (including allergy)                                                                                                                                                                                                                                                                                                                       |
| <b>Keywords:</b>                  | Malnutrition, HIV, Africa, mortality, microbiota, enteropathy                                                                                                                                                                                                                                                                                                                                             |
|                                   |                                                                                                                                                                                                                                                                                                                                                                                                           |

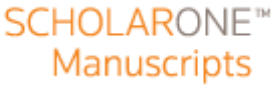

1  
2  
3 **1 Health Outcomes, Pathogenesis and Epidemiology of Severe Acute**  
4 **2 Malnutrition (HOPE-SAM): rationale and methods of a longitudinal**  
5 **3 observational study**  
6  
7  
8  
9

10 Mutsa Bwakura-Dangarembizi<sup>1</sup>, Beatrice Amadi<sup>2</sup>, Claire D Bourke<sup>3</sup>, Ruairi C  
11 Robertson<sup>3</sup>, Benjamin Mwapenya<sup>4</sup>, Kanta Chandwe<sup>2</sup>, Chanda Kapoma<sup>2</sup>, Kapula  
12 Chifunda<sup>2</sup>, Florence Majo<sup>4</sup>, Deophine Ngosa<sup>2</sup>, Pamela Chakara<sup>4</sup>, Nivea Chulu<sup>2</sup>,  
13 Faithfull Masimba<sup>4</sup>, Idah Mapurisa<sup>4</sup>, Ellen Besa<sup>2</sup>, Kuda Mutasa<sup>4</sup>, Simutanyi  
14 Mwakamui<sup>2</sup>, Thompson Runodamoto<sup>4</sup>, Jean H Humphrey<sup>4</sup>, Robert Ntozini<sup>4</sup>, Jonathan  
15 Wells<sup>5</sup>, Ameer R Manges<sup>6</sup>, Jon R Swann<sup>7</sup>, A Sarah Walker<sup>8</sup>, Kusum J Nathoo<sup>1</sup>, Paul  
16 Kelly<sup>2,3</sup>, Andrew J Prendergast<sup>3,4</sup> for the HOPE-SAM Study Team<sup>9</sup>.  
17  
18  
19  
20  
21  
22  
23  
24  
25

26 <sup>1</sup>Department of Paediatrics and Child Health, University of Zimbabwe College of  
27 Health Sciences, Harare, Zimbabwe  
28  
29

30 <sup>2</sup>Tropical Gastroenterology and Nutrition Group, University of Zambia, Lusaka,  
31 Zambia  
32  
33

34 <sup>3</sup>Blizard Institute, Queen Mary University of London, UK  
35

36 <sup>4</sup>Zvitambo Institute for Maternal and Child Health Research, Harare, Zimbabwe  
37

38 <sup>5</sup>UCL Great Ormond Street Institute of Child Health, London, UK  
39

40 <sup>6</sup>University of British Columbia, Vancouver, Canada  
41

42 <sup>7</sup>Imperial College London, UK  
43

44 <sup>8</sup>MRC Clinical Trials Unit at UCL, London, UK  
45

46  
47  
48

49 <sup>9</sup>Other members of the HOPE-SAM study team are listed in the Acknowledgements  
50 section.  
51  
52

53

54 **Corresponding author:** Dr Mutsa Bwakura-Dangarembizi, Senior Lecturer,  
55 Department of Paediatrics and Child Health, University of Zimbabwe College of  
56  
57  
58  
59  
60

1  
2  
3  
4  
5  
6  
7  
8  
9  
10  
11  
12  
13  
14  
15  
16  
17  
18  
19  
20  
21  
22  
23  
24  
25  
26  
27  
28  
29  
30  
31  
32  
33  
34  
35  
36  
37  
38  
39  
40  
41  
42  
43  
44  
45  
46  
47  
48  
49  
50  
51  
52  
53  
54  
55  
56  
57  
58  
59  
60

1 Health Sciences, Box A178, Avondale, Harare, Zimbabwe. Email:  
2 [mbwakura@medsch.uz.ac.zw](mailto:mbwakura@medsch.uz.ac.zw). Tel +263 772 601 735. Fax +263 4 700 877.

3  
4

5 Word count 5926

6 Abstract 261

7

8 Key words: Malnutrition, HIV, Africa, mortality, microbiota, enteropathy, immunology

9  
10

For peer review only

## 1 **ABSTRACT**

### 2 **Introduction**

3 Mortality among children hospitalised for complicated severe acute malnutrition  
4 (SAM) remains high despite the implementation of WHO guidelines, particularly in  
5 settings of high HIV prevalence. Children continue to be at high risk of morbidity,  
6 mortality and relapse after discharge from hospital although long-term outcomes are  
7 not well documented. Better understanding the pathogenesis of SAM and the factors  
8 associated with poor outcomes may inform new therapeutic interventions.

### 10 **Methods and analysis**

11 The Health Outcomes, Pathogenesis and Epidemiology of Severe Acute Malnutrition  
12 (HOPE-SAM) study is a longitudinal observational cohort that aims to evaluate the  
13 short- and long-term clinical outcomes of HIV-positive and HIV-negative children with  
14 complicated SAM, and to identify the risk factors at admission and discharge from  
15 hospital that independently predict poor outcomes. Children aged 0-59mo  
16 hospitalised for SAM are being enrolled at three tertiary hospitals in Harare,  
17 Zimbabwe, and Lusaka, Zambia. Longitudinal mortality, morbidity and nutritional data  
18 are being collected at admission, discharge and for 48 weeks post-discharge. Nested  
19 laboratory substudies are exploring the role of enteropathy, gut microbiota,  
20 metabolomics and cellular immune function in the pathogenesis of SAM using stool,  
21 urine and blood collected from participants and from well-nourished controls.

### 23 **Ethics and dissemination**

24 The study is approved by the local and international institutional review boards in the  
25 participating countries (the Joint Research Ethics Committee of the University of  
26 Zimbabwe, Medical Research Council of Zimbabwe and University of Zambia  
27 Biomedical Research Ethics Committee) and the study sponsor (Queen Mary  
28 University of London). Caregivers provide written informed consent for each



1 participant. Findings will be disseminated through peer-reviewed journals,  
2 conference presentations and to caregivers at face-to-face meetings.

3

#### 4 **Strengths and limitations of this study**

##### 5 **Strengths:**

- 6 • The primary strength of this study is the rigorous collection of longitudinal  
7 data on morbidity, mortality and nutritional status during inpatient care and for  
8 48 weeks after initial admission for SAM.
- 9 • Laboratory sub-studies investigating enteropathy, microbiota, metabolomics  
10 and immune cell function provide a unique opportunity to understand which  
11 pathogenic pathways contribute to SAM and whether these processes  
12 normalise with nutritional rehabilitation, capitalising on a well-characterised  
13 cohort with inclusion of well-nourished controls.
- 14 • This study will compare longitudinal clinical outcomes among HIV-negative  
15 and HIV-positive children with SAM in the current ART era.

16

##### 17 **Potential limitations:**

- 18 • High loss to follow-up due to participants returning to home settings following  
19 hospital discharge. A dedicated clinical study team is in place to maximise  
20 follow-up through phone reminders and community visits.
- 21 • The clinical heterogeneity of the study participants, including comorbidities  
22 such as infections, may make it challenging to identify the specific causes of  
23 clinical outcomes. However, the embedded sub-studies will enable multiple  
24 pathways to be explored within the same cohort.
- 25 • Potential bias in recruiting well-nourished controls only from hospitals will be  
26 reduced by inclusion of community-based controls, including well-nourished  
27 siblings of children with SAM.

## 1 INTRODUCTION

2 Malnutrition underlies almost half of all childhood deaths in developing countries<sup>1</sup>.  
3 Severe acute malnutrition (SAM) is defined by a weight-for-height Z-score <-3, mid-  
4 upper arm circumference (MUAC) <115mm and/or bilateral pitting oedema<sup>2</sup>. Current  
5 treatment guidelines distinguish two groups: i) children with uncomplicated SAM who  
6 can be managed in the community; and ii) children with complicated SAM, who are  
7 hospitalised and undergo resuscitation, stabilisation and nutritional rehabilitation. In-  
8 hospital mortality in children with complicated SAM remains high despite the  
9 implementation of WHO guidelines<sup>3</sup>. Furthermore, SAM presents as two major  
10 clinical phenotypes: non-oedematous SAM (marasmus), characterised by severe  
11 wasting, and oedematous SAM (kwashiorkor), a more complex syndrome  
12 characterised by bilateral pitting oedema, steatosis and diarrhea<sup>4,5</sup>. Despite differing  
13 clinical outcomes, treatment protocols are the same for both oedematous and non-  
14 oedematous SAM.  
15  
16 A contributory factor to high in-patient mortality is the co-occurrence of HIV infection  
17 in around one-third of children hospitalised for SAM in sub-Saharan Africa<sup>6,7</sup>. While  
18 new HIV infections in children have declined<sup>8</sup>, a substantial number of infected  
19 children are diagnosed late and present with malnutrition. There is also a growing  
20 population of HIV-exposed uninfected (HEU) children who have immune  
21 abnormalities, poor growth and higher risk of mortality and infectious morbidity<sup>9</sup>.  
22 Hence, HIV has transformed the epidemiology and outcomes of SAM<sup>10</sup>. Even with  
23 standardised treatment approaches, inpatient deaths are almost four-fold higher  
24 among HIV-positive children with SAM (herein termed HIV-SAM), compared to HIV-  
25 negative children with SAM (30.4% vs 8.4%), for reasons that remain unclear<sup>10</sup>; this  
26 mortality is three-fold higher than would be expected from anthropometric  
27 parameters alone<sup>10</sup>. Management of HIV-SAM is particularly challenging because  
28 HIV fundamentally alters the clinical presentation of malnutrition and the response to

1 treatment. Children with HIV-SAM are more stunted and wasted; have a higher  
2 frequency of persistent diarrhoea; tend to have delayed nutritional recovery and have  
3 a more complicated clinical course than HIV-negative children with SAM<sup>10</sup>.

#### 5 **Long-term outcomes of SAM**

6 Following resolution of complications and return of appetite, children are discharged  
7 from hospital to continue therapeutic feeds at home. However, emerging data  
8 indicate high post-discharge mortality following in-hospital management of SAM<sup>11-13</sup>.  
9 Malnutrition together with young age, HIV infection and pneumonia have been  
10 associated with higher post-discharge mortality<sup>14</sup>. One of the largest prospective  
11 studies of growth and mortality in children with SAM (FuSAM), conducted in Malawi  
12 from July 2006 to March 2007, collected 12-month outcome data on 87% of 1024  
13 children admitted to the nutrition ward<sup>11</sup>. A total of 427 (42%) died and 44% of these  
14 deaths occurred after discharge from hospital. Survival was greatest among those  
15 who were nutritionally cured upon discharge from outpatient therapeutic feeding  
16 centres, defined as two consecutive visits with >80% expected weight-for-height, no  
17 oedema and clinically stable. The risk of mortality after hospital discharge was four-  
18 fold higher for HIV-SAM compared to HIV-negative children with SAM, but the  
19 outcomes among HEU children were not reported. The loss to follow-up was high in  
20 the FuSAM study because there was only one follow-up visit, one year after  
21 discharge from outpatient-feeding centres. A recent study from Kenya identified  
22 malnutrition and HIV infection as key drivers for post-discharge mortality, with 52% of  
23 deaths attributable to MUAC <11.5cm and 11% to HIV infection<sup>15</sup>.

24  
25 The impact of SAM appears to persist beyond the first year after discharge from  
26 hospital. The ChroSAM study, which followed children with SAM seven years post-  
27 discharge, showed that children had poorer growth, body composition and physical  
28 function compared to siblings and community controls, which are all indicators of

1 future cardiovascular and metabolic disease<sup>12</sup>.

2

3 While anthropometry is used to assess nutritional recovery after discharge from  
4 hospital, the pattern and quality of growth recovery following SAM is poorly  
5 understood. The observation that children treated for SAM have a deficit in lean  
6 tissue despite regaining weight suggests that assessing body composition in addition  
7 to anthropometry may help to identify children who have not completely recovered  
8 and are at potential risk of long-term metabolic diseases<sup>12</sup>. Children with HIV-SAM  
9 appear to have potential for catch-up growth in weight-for-age and/or weight-for-  
10 height, which have been shown to normalise with treatment even prior to widespread  
11 availability of ART<sup>16</sup>; by contrast, height-for-age shows less potential for catch-up  
12 growth<sup>17</sup>. However, the body composition of children with HIV-SAM compared to HIV-  
13 negative children with SAM has not been described. Whether children recover fat  
14 mass at the expense of lean mass is unknown, but differences in tissue accretion  
15 patterns may have implications for survival and long-term metabolic health<sup>18 19</sup>. There  
16 is also a need to consider the effect of SAM on the size of body parts which grow at  
17 different rates: relatively shorter legs, for example, are associated with epidemiologic  
18 risk of overweight, coronary artery disease, liver dysfunction and diabetes<sup>20 21</sup>.

19

20 Taken together, there is clearly an elevated risk of mortality among HIV-positive  
21 children with SAM compared to HIV-negative children with SAM, and an ongoing  
22 mortality risk among all children with SAM that persists after discharge from hospital.  
23 There are several gaps in our understanding of the long-term outcomes: (i) causes of  
24 death have not been clearly defined; (ii) no studies have systematically and  
25 longitudinally collected morbidity and mortality data or documented repeat  
26 hospitalisations post-discharge; and, (iii) the long-term outcomes of HIV-positive  
27 children with SAM in the era of ART availability are unclear.

28

## 1 Pathogenesis of SAM

2 Better understanding the pathogenesis of SAM may help to explain the high mortality  
3 of children both during and after hospitalisation and identify new targets for  
4 interventions to supplement existing treatment strategies. Consistent evidence that  
5 immune mediators are altered in malnutrition<sup>22</sup> and that systemic and intestinal  
6 inflammation are associated with poor outcomes in SAM<sup>23</sup>, suggest that immune  
7 dysfunction contributes to infectious susceptibility<sup>24</sup>. Malnutrition is also characterised  
8 by a complex derangement in gut microbial<sup>25</sup> metabolic,<sup>26</sup> immune<sup>27</sup> and hormonal  
9 pathways, organ dysfunction and micronutrient deficiencies in the context of co-  
10 infections, enteropathy and chronic inflammation. Several studies have recently  
11 provided insights into these perturbations using new tools<sup>25 26 28 29</sup>, including  
12 metabolomics and metagenomics, but we still lack a clear understanding of many of  
13 the pathogenic pathways driving malnutrition, the interactions between these  
14 pathways, and which are the most tractable targets for intervention.

15  
16 SAM shares several pathological and clinical features with HIV, which may explain  
17 clinical outcomes in these co-occurring conditions: 1) both are characterised by  
18 intestinal damage, leading to impairment of the mucosal barrier and increased  
19 intestinal permeability; 2) both have underlying systemic immune activation; and 3)  
20 both are frequently complicated by persistent diarrhoea, pneumonia and sepsis that  
21 may plausibly arise due to loss of intestinal barrier function<sup>30</sup>. Understanding the  
22 overlapping impact of HIV and SAM is critical to inform additional interventions to  
23 improve outcomes of children with HIV-SAM.

## 24 OBJECTIVES OF HOPE-SAM

25 The Health Outcomes, Pathogenesis and Epidemiology of Severe Acute Malnutrition  
26 (HOPE-SAM) study has two primary objectives:  
27

- 1) To describe the short- and long-term clinical outcomes of children with complicated SAM, with and without HIV infection, and to identify the risk factors at admission and discharge from hospital that independently predict these outcomes.
- 2) To better characterise the pathogenesis of SAM through nested laboratory sub-studies evaluating enteropathy, gut microbiota, metabolomics and immune cell function.

## STUDY DESIGN

HOPE-SAM is a longitudinal observational cohort study, enrolling between 600-800 children aged 0-59 months admitted with complicated SAM to the tertiary pediatric wards at two sites in Zimbabwe (Parirenyatwa Hospital and Harare Children's Hospital) and one in Zambia (University Teaching Hospital, Lusaka). Both HIV-positive and HIV-negative children will be enrolled. Throughout this paper, 'SAM' refers to all children, regardless of HIV status; where analyses specifically compare children by HIV status, groups are identified as HIV-positive children with SAM (or HIV-SAM) and HIV-negative children with SAM. All participants with SAM are followed for 48 weeks post-discharge, with longitudinal data collection and blood sampling. The study contains four nested sub-studies as shown in **Figure 1**. A subgroup of children will be recruited to the enteropathy substudy for which they will have the same follow-up procedures but more intensive biological specimen collection including stool (all time-points), urine after lactulose-mannitol (LM) challenge as an assessment of intestinal permeability, and nasogastric aspirate (baseline only); these children are also included in microbiota and metabolomics substudies. Children with SAM for whom blood samples are available are included in the immunology substudy, for which circulating inflammatory mediators will be assayed; functional cellular immunology assays will be conducted for all children in the immunology sub-study with sufficient sample volume (> 2mL) recruited after June

1  
2  
3 1 2017. A group of healthy children recruited from the same hospitals and  
4  
5 2 communities, who are well-nourished and matched to children in the enteropathy  
6  
7 3 substudy by age and HIV status, will have data and specimens collected to provide  
8  
9 4 normative data for the laboratory substudies; these well-nourished controls will not  
10  
11 5 be followed longitudinally.  
12  
13 6

14  
15 7 The study protocol, data collection forms and standard operating procedures are  
16  
17 8 available online at [osf.io/29uaw](https://osf.io/29uaw).  
18  
19 9

## 10 **RECRUITMENT**

11 *Screening:* Caregivers of all hospitalised children are sensitised about the study. All  
12  
13 12 new admissions aged 0-59 months are screened for SAM, which is defined  
14  
15 13 according to WHO criteria as any of: weight-for-height Z-score (WHZ) <-3, MUAC  
16  
17 14 <115 mm (if aged 6-59mo) and/or bilateral pitting oedema. All children with SAM are  
18  
19 15 recruited from hospital and this study therefore focuses on complicated SAM;  
20  
21 16 children with uncomplicated SAM will not be enrolled.  
22  
23 17

24  
25 18 *Eligibility for observational cohort:* All children with SAM whose caregivers are willing  
26  
27 19 to provide written informed consent and to learn their child's HIV status are offered  
28  
29 20 enrolment. Any children who die prior to study enrolment and those with a known  
30  
31 21 malignancy are ineligible.  
32  
33 22

34  
35 23 *Eligibility for enteropathy substudy:* Children with SAM aged 6-59 months with a  
36  
37 24 nasogastric tube in place (or due to be placed) are categorized into 4 groups (HIV-  
38  
39 25 positive oedematous (Group A-I); HIV-positive non-oedematous (Group A-II); HIV-  
40  
41 26 negative oedematous (Group C-I) and HIV-negative non-oedematous (Group C-II),  
42  
43 27 as shown in Table 1. Children meeting eligibility criteria will be enrolled throughout  
44  
45 28 the study recruitment period until sufficient specimens have been collected from the  
46  
47  
48  
49  
50  
51  
52  
53  
54  
55  
56  
57  
58  
59  
60

1 groups shown in Table 1. Children in the enteropathy substudy are stratified into age  
 2 bands (6-11 months; 12-23 months and 24-59 months) to enable age-matching of  
 3 well-nourished controls. Children with underlying chronic gastrointestinal disease or a  
 4 known malignancy are ineligible.

5  
 6 **Table 1: Enteropathy substudy groups**

| Children aged 6-59 months                                           | Severe acute malnutrition <sup>1</sup> |                      | Well nourished controls<br>WHZ>-1 |
|---------------------------------------------------------------------|----------------------------------------|----------------------|-----------------------------------|
|                                                                     | Oedematous <sup>2</sup>                | Non-oedematous       |                                   |
| <b>HIV-positive</b><br>(HIV PCR+ if <18mo; HIV antibody + if >18mo) | N=50<br>(Group A-I)                    | N=50<br>(Group A-II) | N=100 <sup>3</sup><br>(Group B)   |
| <b>HIV-negative</b><br>(HIV PCR- if <18mo; HIV antibody - if >18mo) | N=50<br>(Group C-I)                    | N=50<br>(Group C-II) | N=100 <sup>4</sup><br>(Group D)   |

7  
 8 <sup>1</sup>SAM defined according to WHO criteria

9 <sup>2</sup>Presence of bilateral pitting pedal oedema.

10 Note that children below 6 months of age are excluded from the enteropathy substudy to avoid  
 11 interrupting exclusive breastfeeding during the lactulose-mannitol test.

12 WHZ: Weight-for-height Z score; PCR: polymerase chain reaction.

13  
 14  
 15 *Eligibility for microbiota and metabolomics substudies:* Children enrolled into the  
 16 enteropathy substudy are also included in the microbiota and metabolomics  
 17 substudies, since these substudies utilize the stool, urine and plasma samples  
 18 collected for enteropathy analyses.

19  
 20 *Eligibility for immunology substudy:* The immunology substudy comprises all children  
 21 with SAM (drawn from both the observational cohort and the enteropathy substudy,  
 22 as shown in Figure 1) providing a blood sample of sufficient volume (>2ml) for  
 23 cellular assays after 1<sup>st</sup> June 2017.

24  
 25 *Well-nourished controls:* Controls are children drawn from the same hospitals and  
 26 communities as cases with SAM (including well-nourished sibling controls), who are



aged 6-59 months (matched to enteropathy substudy children within age bands), well-nourished (weight-for-height Z-score >-1) and clinically well (no acute illness or current infections) with known HIV status. Controls are categorized into two groups: well-nourished HIV-positive (Group B) and well-nourished HIV-negative (Group D), as shown in Table 1. Children with underlying chronic gastrointestinal disease or a known malignancy are ineligible. Well-nourished controls provide comparison biomarker data for all the laboratory substudies.

*Informed consent procedures:* Written informed consent is obtained from the primary caregiver using consent forms translated into local languages; where possible, other family members are included in the consent process. Illiterate caregivers who have understood a verbal explanation of the study can provide a thumb imprint in the presence of a witness. Assent from children is not sought because all are <5 years old.

## STUDY PROCEDURES

Study procedures are outlined in **Table 2**.

**Table 2: Summary of procedures in observational cohort**

| Assessment                                              | Hospitalization              |                        | Post-discharge <sup>3</sup> |    |     |     |     |
|---------------------------------------------------------|------------------------------|------------------------|-----------------------------|----|-----|-----|-----|
|                                                         | Baseline <sup>1</sup>        | Discharge <sup>2</sup> | 2w                          | 4w | 12w | 24w | 48w |
| Caregiver informed consent to join observational cohort | x                            |                        |                             |    |     |     |     |
| Summary checklist                                       | x                            |                        |                             |    |     |     |     |
| Locator information <sup>4</sup>                        | x                            |                        |                             |    |     |     |     |
| Acute admission information                             | x                            |                        |                             |    |     |     |     |
| Baseline data                                           | x                            |                        |                             |    |     |     |     |
| Daily clinical review <sup>5</sup>                      | Daily during hospitalisation |                        |                             |    |     |     |     |
| Blood collection <sup>6</sup>                           | x                            | x                      |                             |    | x   | x   | x   |
| HIV testing <sup>7</sup>                                | x                            |                        |                             |    |     |     |     |
| CD4 count and viral load                                | x                            |                        |                             |    | x   | x   | x   |

|                                                                      |   |   |                                             |   |   |   |   |
|----------------------------------------------------------------------|---|---|---------------------------------------------|---|---|---|---|
| (HIV-infected children only)                                         |   |   |                                             |   |   |   |   |
| Full blood count <sup>8</sup>                                        | x | x |                                             |   | x | x | x |
| Anthropometry                                                        | x | x | x                                           | x | x | x | x |
| Skinfold thickness <sup>9</sup>                                      |   | x | x                                           | x | x | x | x |
| Body composition <sup>10</sup>                                       | x | x | x                                           | x | x | x | x |
| Discharge data collection                                            |   | x |                                             |   |   |   |   |
| Daily morbidity diary                                                |   |   | Daily during follow-up period by caregivers |   |   |   |   |
| Follow-up clinic: history, examination, morbidity and mortality data |   |   | x                                           | x | x | x | x |

1

- <sup>1</sup>Children will be enrolled as soon as possible after hospitalisation and will undergo baseline investigations as soon as possible after enrolment. This is to provide a window of opportunity to time collection of research specimens with clinical specimens, and to ensure that the child is clinically stable before undertaking research investigations.
- <sup>2</sup>The discharge procedures will be undertaken on the day of discharge, or as close as possible to that date.
- <sup>3</sup>Windows will be created around these post-discharge time-points to maximize follow-up for caregivers who miss visits or are unavailable, as follows: 2 weeks (1-3 weeks); 4 weeks (3-5 weeks); 12 weeks (10-14 weeks); 24 weeks (20-28 weeks); 48 weeks (44-52 weeks).
- <sup>4</sup>Locator information will updated at subsequent visits if caregivers have moved or changed contact details.
- <sup>5</sup>A clinical review will be undertaken every day between admission and discharge by the study clinician.
- <sup>6</sup>5.4 mL of blood (depending on child weight; amount will not exceed 2 mL/kg total over 2 week period) will be collected by a study nurse into endotoxin-free EDTA tubes. Samples will be used to store whole blood, PBMC and plasma for subsequent measurement of CRP and albumin. Where blood sample volumes allow ( $\geq 2$ mL sample), bacterial binding assays and whole blood stimulations will be conducted and culture supernatants and cells stored for subsequent assessment of immune cell function at each time-point.
- Study blood samples will not be collected from children with known haemoglobin  $< 6$  g/dL.
- <sup>7</sup>HIV testing is conducted as part of routine clinical practice, but if it has not been undertaken, the study sample will be used to test for HIV, as stated in the informed consent form, since HIV status is required to allocate children to study groups.
- <sup>8</sup>Full blood count results will be transcribed from clinical records; if not done by clinical teams, the EDTA sample will be used to measure FBC in clinical laboratories at each site
- <sup>9</sup>Skinfold thickness (triceps, subscapular, supra-iliac) and mid-thigh circumference will be measured using Holtain calipers or tape measure.
- <sup>10</sup>Body composition will be assessed by bioimpedance vector analysis.

### Baseline procedures:

Baseline data on maternal and household characteristics, the child's past medical history and current illness are collected by a study nurse. Anthropometry, including body composition measured by whole-body (wrist-ankle) bio-electrical impedance analysis (BodyStat 1500MD; BodyStat Ltd., Douglas, Isle of Man), leg length using an electronic knemometer (Zimbabwe only) and triceps, subscapular and supra-iliac

1  
2  
3 1 skinfold thickness using calipers (Holtain Ltd., Crymych, UK) are undertaken at  
4  
5 2 baseline. Blood (1mL/kg up to 5.4mL maximum) is collected at baseline into an  
6  
7 3 endotoxin-free EDTA tube for all children and, in the enteropathy substudy,  
8  
9 4 additionally into a PAXgene tube (PreAnalytiX GmbH, Hombrechtikon, Switzerland)  
10  
11 5 for subsequent transcriptomic analysis. Blood is not collected from children with  
12  
13 6 severe anaemia (known haemoglobin <6 g/dL). HIV testing is carried out in  
14  
15 7 accordance with national guidelines as part of routine clinical practice; where it has  
16  
17 8 not been done, the child's HIV status is ascertained using a rapid test antibody  
18  
19 9 algorithm for children over 18 months, or HIV DNA PCR for children under 18  
20  
21 10 months. CD4 count/percentage and viral load are measured in HIV-positive children.  
22  
23 11 Maternal HIV status is documented where available, so that HIV-exposed uninfected  
24  
25 12 children can be identified. Blood samples are sent to research laboratories at each  
26  
27 13 site to conduct whole blood stimulation and bacterial binding assays (as described in  
28  
29 14 the immunology substudy) and to store aliquots of whole blood, peripheral blood cells  
30  
31 15 and plasma at -80°C<sup>31</sup>. In the enteropathy substudy, nasogastric aspirate, stool and  
32  
33 16 urine (after an oral dose of lactulose and mannitol) are also collected. Lactulose and  
34  
35 17 mannitol are ingested by the child after fasting and urine is collected over a two-hour  
36  
37 18 period to measure recovery of lactulose and mannitol, a measure of intestinal  
38  
39 19 absorptive capacity and permeability, as previously described<sup>32</sup>.

40  
41 20  
42  
43 21 *Daily procedures:* Routine inpatient management is undertaken by ward clinical  
44  
45 22 teams according to local hospital protocols, which are based on WHO guidelines<sup>2, 33</sup>.  
46  
47 23 In addition, the HOPE-SAM study clinician at each hospital site collects daily data  
48  
49 24 until discharge on clinical parameters (including daily examination), resolution of  
50  
51 25 acute infections, nutritional recovery (loss of oedema, restoration of appetite, weight  
52  
53 26 gain), and treatment/nutritional supplements received; this will allow us to evaluate  
54  
55 27 differences in management between countries. Children with HIV-SAM who are ART-

1  
2  
3 1 naïve start ART according to national guidelines, which are based on WHO  
4 2 recommendations<sup>2 34</sup>.

5  
6  
7 3  
8  
9 4 *Discharge:* The clinical team decides when the child is ready to be discharged, which  
10 5 is generally when their medical complications are resolving and the child has a good  
11 6 appetite and is clinically well and alert<sup>2</sup>. Children receive ready-to-use therapeutic  
12 7 feeds (RUTF) to take at home according to local guidelines. At discharge, the study  
13 8 nurse collects data and a repeat blood sample (including full blood count) and  
14 9 undertakes discharge anthropometry, body composition, leg length (Zimbabwe only)  
15 10 and triceps, subscapular and supra-iliac skinfold thickness measurements (**Table 2**).  
16 11 The caregiver is given a daily morbidity diary and pre-prepared stickers  
17 12 corresponding to different illnesses and shown how to complete the diary. The  
18 13 caregiver is provided with the date of the first follow-up appointment and contact  
19 14 details of the study nurse.

20  
21  
22 15  
23 16 *Follow-up:* Children attend follow-up appointments at dedicated study clinics at 2, 4,  
24 17 12, 24 and 48 weeks post-discharge. At each visit, the study physician undertakes a  
25 18 clinical assessment and the study nurse captures illness, medication and feeding  
26 19 data. Clinic data are transcribed from handheld medical records if available and the  
27 20 morbidity diary is reviewed and a new diary and stickers supplied. Anthropometry,  
28 21 body composition, leg length (Zimbabwe only) and triceps, subscapular and supra-  
29 22 iliac skinfold thicknesses are measured at each visit. Acute illnesses are treated in  
30 23 the study clinic, or the child is referred to hospital if necessary. Children with relapsed  
31 24 malnutrition are provided with nutritional supplements or RUTF according to local  
32 25 guidelines, or readmitted to hospital if they develop complicated SAM. Transport  
33 26 reimbursement for clinic attendance is provided to caregivers for each visit.

34  
35  
36  
37  
38  
39  
40  
41  
42  
43  
44  
45  
46  
47  
48  
49  
50  
51  
52  
53  
54  
55  
56 28 Blood is collected at weeks 12, 24 and 48 post-discharge into endotoxin-free EDTA

1 tubes to measure full blood count, CD4 count and viral load (HIV-positive children  
 2 only), conduct whole blood stimulation and bacterial binding assays (where blood  
 3 volumes >2mL), and store peripheral blood cells and plasma aliquots for subsequent  
 4 analysis (all blood samples), including soluble and cellular markers of immune  
 5 activation, as outlined in **Supplementary Table 1**. Children in the enteropathy  
 6 substudy have additional stool and urine collection following lactulose-mannitol  
 7 dosing as shown in **Table 3**.

8  
 9 **Table 3: Summary of procedures for cases in the enteropathy substudy**

| Assessment                                                                       | Hospitalization              |                        | Post-discharge <sup>3</sup> |    |     |     |     |
|----------------------------------------------------------------------------------|------------------------------|------------------------|-----------------------------|----|-----|-----|-----|
|                                                                                  | Baseline <sup>1</sup>        | Discharge <sup>2</sup> | 2w                          | 4w | 12w | 24w | 48w |
| Caregiver informed consent to join observational cohort and enteropathy substudy | X                            |                        |                             |    |     |     |     |
| Summary checklist                                                                | X                            |                        |                             |    |     |     |     |
| Locator information <sup>4</sup>                                                 | X                            |                        |                             |    |     |     |     |
| Acute admission information                                                      | x                            |                        |                             |    |     |     |     |
| Baseline data                                                                    | X                            |                        |                             |    |     |     |     |
| Daily clinical review <sup>5</sup>                                               | Daily during hospitalisation |                        |                             |    |     |     |     |
| Blood collection <sup>6</sup>                                                    | x                            | x                      |                             |    | x   | x   | x   |
| HIV testing <sup>7</sup>                                                         | X                            |                        |                             |    |     |     |     |
| CD4 count and viral load (HIV-infected children only)                            | X                            |                        |                             |    | x   | x   | x   |
| Full blood count <sup>8</sup>                                                    | X                            | x                      |                             |    | x   | x   | x   |
| Gastric aspirate <sup>9</sup>                                                    | x                            |                        |                             |    |     |     |     |
| Stool collection <sup>10</sup>                                                   | x                            | x                      |                             |    | x   | x   | x   |
| Lactulose-mannitol testing <sup>11</sup>                                         | x                            | x                      |                             |    | x   |     | x   |
| Anthropometry                                                                    | X                            | x                      | x                           | x  | x   | x   | x   |
| Skinfold thickness <sup>12</sup>                                                 |                              | x                      | x                           | x  | x   | x   | x   |
| Body composition <sup>13</sup>                                                   | X                            | x                      | x                           | x  | x   | x   | x   |
| Discharge data collection                                                        |                              | x                      |                             |    |     |     |     |

|                                                                      |  |  |                                             |   |   |   |   |
|----------------------------------------------------------------------|--|--|---------------------------------------------|---|---|---|---|
|                                                                      |  |  |                                             |   |   |   |   |
| Daily morbidity diary                                                |  |  | Daily during follow-up period by caregivers |   |   |   |   |
| Follow-up clinic: history, examination, morbidity and mortality data |  |  | x                                           | x | x | x | x |

1

2

3

4

5

6

7

8

9

10

11

12

13

14

15

16

17

18

19

20

21

22

23

24

25

26

27

28

29

30

31

32

33

34

35

36

37

38

39

40

41

42

43

44

45

46

47

48

49

50

51

<sup>1</sup>Children will be enrolled within 24h of hospitalization and will undergo baseline investigations within 72h of hospitalization. This is to provide a window of opportunity to time collection of research specimens with clinical specimens, and to ensure that the child is clinically stable before undertaking research investigations.

<sup>2</sup>The discharge procedures will be undertaken on the day of discharge, or as close as possible to that date.

<sup>3</sup>Windows will be created around these post-discharge time-points to maximize follow-up for caregivers who miss visits or are unavailable, as follows: 2 weeks (1-3 weeks); 4 weeks (3-5 weeks); 12 weeks (10-14 weeks); 24 weeks (20-28 weeks); 48 weeks (44-52 weeks).

<sup>4</sup>Locator information will updated at subsequent visits if caregivers have moved or changed contact details.

<sup>5</sup>Daily clinical review will be conducted every day between admission and discharge by the study clinician.

<sup>6</sup>During hospitalisation, 5.4 mL of blood (depending on child weight; amount will not exceed 2 mL/kg total over 2 week period) will be collected by a study nurse into a 2.7 mL endotoxin-free EDTA tube and a 2.7 mL PAXGene tube, for subsequent isolation of RNA and gene expression analysis. After discharge (weeks 12, 24 and 48), 5.4 mL of blood (depending on child weight; amount will not exceed 2 mL/kg total over 2 week period) will be collected by a study nurse into two 2.7 mL endotoxin-free EDTA tubes.

<sup>7</sup>HIV testing is conducted as part of routine clinical practice, but if it has not been undertaken, the study sample will be used to test for HIV (see section 9.4), as stated in the informed consent form, since HIV status is required to allocate children to study groups.

<sup>8</sup>Full blood count results will be transcribed from clinical records; if not done by clinical teams, the EDTA sample will be used to measure FBC in clinical laboratories at each site

<sup>9</sup>A gastric juice sample will be collected at the same time as the blood draw by aspirating the nasogastric tube with a sterile feeding syringe, to test for gastric pH; sterile water or saline will then be instilled and a sample of gastric juice collected for storage for subsequent PCR and culture (section 7.5.2)

<sup>10</sup>Stool collection will be undertaken at the same time as the blood draw

<sup>11</sup>Lactulose-mannitol testing will be conducted, with collection of a baseline urine sample, followed by a 2hr urine collection post-LM ingestion. This test will be deferred until children are judged to be clinically stable by the study physician during daily reviews. In general, this will be a child in the nutritional rehabilitation phase, who has no cardiorespiratory compromise.

<sup>12</sup>Skinfold thickness (triceps, subscapular, supra-iliac) and mid-thigh circumference will be measured using Holtain calipers or tape measure.

<sup>13</sup>Body composition will be assessed by bioimpedance vector analysis.

Caregivers are reminded of follow-up visits by phone, and visit completion is tracked on a dedicated database. If caregivers do not attend follow-up appointments, attempts are made to contact them by phone and home visits are made if feasible, particularly for those defaulting the 48-week visit, so that long-term outcome data can be collected. For post-discharge deaths, a home visit is undertaken by study nurses where possible to conduct a verbal autopsy. Children who are readmitted to one of

1 the study sites with relapsed SAM have data collected during the new episode of  
2 hospitalisation. The study ends for each participant at the week 48 visit.

3

#### 4 **SUBSTUDIES**

5 As outlined in Figure 1, four nested substudies will utilise biological specimens to  
6 address mechanistic questions related to enteropathy, microbiota, metabolomics and  
7 immune function.

8

##### 9 *Enteropathy substudy*

10 The gut, which acts as an internal interface between humans and the environment,  
11 must contain the nutrient stream and the symbiotic microbiota while allowing  
12 molecular intimacy to permit absorption. The mechanism underlying this duality is the  
13 integrity of the gastrointestinal barrier; intestinal damage (enteropathy) can impair  
14 this critical barrier function. A spectrum of enteropathies affect children in developing  
15 countries<sup>30</sup>. Environmental enteric dysfunction (EED), characterised by small  
16 intestinal inflammation, blunted villi and increased intestinal permeability, is almost  
17 universal and is morphologically indistinguishable from HIV enteropathy<sup>30</sup>. Children in  
18 resource-poor settings also suffer from frequent diarrhoea, food insecurity and  
19 micronutrient deficiencies, which all exacerbate enteropathy<sup>30</sup>. As a result, a cycle of  
20 intestinal infection, impaired mucosal function and malnutrition commonly arises,  
21 which may ultimately precipitate SAM, especially in the context of HIV infection<sup>35 36</sup>.  
22 It is not yet established if the enteropathy seen in children with SAM<sup>37</sup>, which we here  
23 refer to as malnutrition enteropathy<sup>37</sup>, is qualitatively or quantitatively distinguishable  
24 from EED. In addition to local intestinal pathology, enteropathies may cause systemic  
25 pathology due to persistent immune activation arising from enteric inflammation and  
26 microbial translocation across the damaged gut wall<sup>30</sup>. It is becoming apparent that  
27 chronic inflammation may be particularly deleterious in malnourished individuals<sup>23</sup>; in

1 children with SAM, systemic inflammation arising from underlying enteropathy may  
2 further increase morbidity and mortality.

3  
4 We hypothesize that i) the degree of enteropathy during hospitalisation differs  
5 between oedematous and non-oedematous SAM and is independently associated  
6 with morbidity, mortality and nutritional recovery during hospitalization; ii) the degree  
7 of enteropathy at discharge is independently associated with morbidity, mortality and  
8 relapse of SAM; and iii) children with HIV-SAM have more severe enteropathy than  
9 HIV-negative children with SAM, which contributes to their poorer outcomes.

10  
11 Using stored samples, a longitudinal series of investigations will compare gastric and  
12 small intestinal barrier function, using a range of biomarkers to capture the domains  
13 of malnutrition enteropathy (**Supplementary Table 2**). To understand better the  
14 extra-intestinal consequences of enteropathy, we will first compare the microbial  
15 composition of the upper gut and plasma using deep sequencing in a subgroup of  
16 children with paired gastric and blood samples. Secondly, we will undertake  
17 transcriptomics using PAXGene blood samples to determine i) whether there are  
18 differences in gene expression profiles between well-nourished controls, HIV-  
19 negative children with SAM and HIV-positive children with SAM (including  
20 comparison of oedematous and non-oedematous types); and ii) whether specific  
21 patterns of gene expression are associated with morbidity and mortality in SAM.

22

### 23 *Microbiota substudy*

24 Normal assembly of the gut microbiota in early life is critical for many aspects of  
25 physiological, neurological and immune development<sup>38</sup>. Recent evidence suggests  
26 that an immature or pathogenic microbiota plays a causative role in the pathogenesis  
27 of SAM<sup>25</sup>. For example, a number of microbial taxa have been identified, including  
28 *Faecalibacterium prausnitzii*, which discriminate and predict gut microbiota maturity



1  
2  
3 1 and child growth<sup>28</sup>. Other pathogenic microorganisms, including IgA-targeted  
4 2 *Enterobacteriaceae*, are associated with impaired growth and may contribute to  
5 3 SAM<sup>39</sup>. Nutritional rehabilitation with RUTF induces temporary recovery of a  
6 4 disturbed microbiota; however, the microbiota appears to revert back to an immature  
7 5 diseased state following nutritional recovery<sup>29</sup>. HIV infection is also associated with a  
8 6 disturbed gut microbiota<sup>40</sup>, which may further compound enteropathy phenotypes.  
9 7 Furthermore, there is some evidence that differences exist in malnutrition  
10 8 enteropathy between oedematous and non-oedematous SAM<sup>41</sup>; however, few  
11 9 studies have investigated differences in the gut microbiota between the two forms of  
12 10 the disease.

13  
14  
15 12 We hypothesize that (i) a unique gut microbial signature exists in HIV-SAM,  
16 13 compared with HIV-negative children with SAM, that is independently associated with  
17 14 morbidity, mortality, nutritional recovery and degree of enteropathy during  
18 15 hospitalisation; (ii) a unique gut microbial signature exists in oedematous compared  
19 16 with non-oedematous SAM; (iii) specific microorganisms or gut microbial diversity  
20 17 indices are independently associated with morbidity, mortality, nutritional recovery  
21 18 and degree of enteropathy during hospitalisation; and (iv) the gut microbiota is  
22 19 partially restored to a healthy state with nutritional rehabilitation but reverts to a  
23 20 dysbiotic state during follow-up, which predicts morbidity, mortality and relapse of  
24 21 SAM.

25  
26  
27 23 Using stored stool samples collected at baseline, a cross-sectional investigation will  
28 24 determine differences in the gut microbial composition and predicted function  
29 25 between: HIV-negative children with SAM versus HIV-SAM, oedematous versus non-  
30 26 oedematous SAM, and well-nourished controls. Gut microbial composition and  
31 27 predicted function will be compared between groups at discharge and at 12, 24 and  
32 28 48 weeks post-discharge. Briefly, total DNA and/or RNA will be extracted from stool

1 samples and used as template for next-generation sequencing library preparation  
2 and for quantitative polymerase chain reaction (qPCR). Whole metagenome shotgun  
3 sequencing will be performed using the HiSeq 2500 system. Raw metagenomic  
4 sequencing data will be quality-filtered and analysed through a well-validated  
5 bioinformatics pipeline using MetaPhlan<sup>42</sup> and HUMAnN<sup>43</sup>. The compositional and  
6 predicted functional metagenomic data generated will be used to identify signatures  
7 of SAM and to investigate associative links between specific gut microbial signatures  
8 and clinical outcomes.

#### 9 10 11 *Metabolomics substudy*

12 During SAM, metabolic processes are altered in response to a starved environment,  
13 and may plausibly contribute to long-term clinical outcomes. Previous studies  
14 suggest that amino acid turnover, lipid metabolism, oxidative stress and other  
15 metabolic pathways are disrupted in SAM and may be associated with disease state  
16 and clinical outcome<sup>26 44 45</sup>; however, little is known about how the metabolic  
17 phenotype responds to nutritional therapy. It is hypothesised that disturbed gut  
18 microbiota composition and function may drive microbial metabolic dysregulation in  
19 addition to host-derived dysregulation. Of particular interest are differences in the  
20 metabolic phenotype between oedematous and non-oedematous SAM. The  
21 'reductive adaptation' seen in non-oedematous SAM (utilisation of fat and muscle  
22 stores) is disrupted in oedematous SAM, which may contribute to differences in  
23 clinical outcomes. Specifically, protein turnover, inflammation, oxidative stress and  
24 bile acid metabolism are disrupted in oedematous-SAM, which may contribute to co-  
25 morbidities including diarrhoea, steatosis and enteropathy<sup>46 47</sup>.

26  
27 We hypothesize that: (i) a unique plasma and urine metabolic phenotype exists in  
28 oedematous compared with non-oedematous SAM during hospitalisation, which is

1 independently associated with morbidity, mortality and nutritional recovery; (ii) the  
2 metabolic phenotype is partially restored to a healthy state with nutritional  
3 rehabilitation but reverts to a disturbed state during follow-up, which predicts  
4 morbidity, mortality and relapse; and (iii) both host-derived and gut microbial-driven  
5 metabolic dysregulation underlie clinical outcomes.

6  
7 Using stored urine and plasma samples collected during hospitalisation, a cross-  
8 sectional investigation will determine differences in the metabolic phenotype between  
9 children with oedematous SAM, non-oedematous SAM and well-nourished controls.  
10 Urine and plasma metabolic phenotypes will be compared between groups at  
11 discharge and 12, 24 and 48 weeks post-discharge. Briefly, global untargeted  
12 metabolomic phenotyping will be performed via <sup>1</sup>H nuclear magnetic resonance  
13 (NMR) spectroscopy using a 700 MHz Bruker NMR spectrometer to identify  
14 metabolic signatures of SAM. Targeted analysis via ultra-performance liquid  
15 chromatography-mass spectrometry will be performed to examine specific pathways  
16 of interest, including tryptophan and bile acid metabolism.

### 17 18 *Immunology substudy*

19 Bacterial infections are common among children hospitalised for SAM<sup>23 48-50</sup> and  
20 mortality is driven by a range of species<sup>48 50-53</sup>, consistent with generalised defects in  
21 innate anti-bacterial defence. Increased infectious morbidity and mortality persist  
22 after discharge from hospital<sup>10 17 54</sup>, suggesting that restoration of anti-bacterial  
23 immune responses may lag behind nutritional rehabilitation. A recent randomised  
24 trial in children with SAM confirmed that deaths following hospitalisation were  
25 predominantly due to bacterial infections but were not prevented by daily co-  
26 trimoxazole prophylaxis<sup>17</sup>. Collectively, these observations highlight that children  
27 remain vulnerable to infection despite current treatment approaches; targeting

1  
2  
3 1 persistent immune dysfunction could plausibly reduce infectious mortality after  
4 discharge<sup>24</sup>.  
5  
6  
7 3  
8  
9 4 Multiple innate and adaptive immune mediators are dysregulated in malnutrition<sup>24 27</sup>  
10  
11 5<sup>55</sup>. However, few studies have assessed cellular immune function in malnourished  
12  
13 6 children; most existing studies were undertaken decades ago on small cross-  
14  
15 7 sectional cohorts without the benefit of recent advances in immunology techniques<sup>27</sup>.  
16  
17 8 Immune dysfunction in SAM likely reflects both *intrinsic* defects, whereby immune  
18  
19 9 cells lack capacity to adequately respond to infection, and *extrinsic* defects, where  
20  
21 10 cells have intact anti-bacterial capacity but are chronically modulated by the systemic  
22  
23 11 pro-inflammatory environment which characterises SAM (i.e. heightened pro-  
24  
25 12 inflammatory cytokines<sup>44</sup> and circulating bacterial antigens<sup>23 56 57</sup>). Systemic  
26  
27 13 inflammation is directly associated with mortality in SAM<sup>23</sup> and driven by multiple  
28  
29 14 comorbidities, including bacterial translocation from the damaged gut into the blood,  
30  
31 15 sub-clinical infections and metabolic dysregulation<sup>44 58 59</sup>. The implications of innate  
32  
33 16 immune cell dysfunction for subsequent acquisition of infections and infectious  
34  
35 17 mortality have not been investigated.

36  
37 18  
38  
39 19 We hypothesise that: (i) anti-bacterial functions of innate immune cells are  
40  
41 20 compromised in SAM due to a combination of intrinsic and extrinsic defects; ii) innate  
42  
43 21 immune cell function is independently associated with infectious morbidity and  
44  
45 22 mortality during hospitalisation for SAM; and iii) nutritional rehabilitation only partly  
46  
47 23 restores innate immune cell function, leading to an ongoing risk of bacterial infections  
48  
49 24 post-discharge.

50  
51 25  
52  
53 26 Using blood samples collected at baseline, discharge and 12, 24 and 48 weeks post-  
54  
55 27 discharge, the longitudinal relationship between circulating innate immune cell  
56  
57 28 function and bacterial infections will be assessed. The intrinsic phagocytic capacity,

1 secreted cytokine response and maturation state of innate immune cells after culture  
2 with bacterial antigens will be assessed. Plasma concentrations of endotoxin and  
3 pro-inflammatory mediators will be quantified at each time-point and the degree to  
4 which these extrinsic factors influence innate immune cell antibacterial function will  
5 be assessed via plasma co-culture with innate immune cells from healthy donors.  
6 Bacterial infections during hospitalisation will be diagnosed using clinical criteria and  
7 blood culture, stool culture and urinalysis where available.

## 8 9 **SAMPLE SIZES**

10 *Observational study:* The observational cohort will recruit as many children with SAM  
11 as possible during the period of enrolment (July 2016 to March 2018), estimated at  
12 600-800 children (capped at 800 maximum), to assess clinical and nutritional  
13 outcomes among HIV-positive and HIV-negative children hospitalised with SAM.  
14 Assuming mortality of 15%, overall loss to follow-up of 15% and recruitment target of  
15 800 children, there would be 560 evaluable children at 48 weeks, of whom 224 would  
16 have HIV-SAM based on an estimated inpatient HIV prevalence of 40%. This will  
17 provide >80% power to detect absolute differences of 17% in binary outcomes  
18 between HIV-SAM and HIV-negative children with SAM, and of 0.33 times the  
19 standard deviation in continuous outcomes.

20  
21  
22 *Enteropathy substudy:* The sample size was estimated using previously reported  
23 values for LM ratios, which remain a widely used non-invasive marker of  
24 enteropathy. Comparing 100 versus 100 children with two-sided  $\alpha=0.025$  (to  
25 allow for two primary comparisons, i.e. HIV-SAM versus HIV-negative children with  
26 SAM, and HIV-SAM versus well-nourished HIV-positive children) provides >80%  
27 power to detect differences in mean LM ratio during hospitalisation of at least 0.16

1 (assuming SD=0.36), a difference which would be clinically relevant given the LM  
2 ratios previously reported for well-nourished children (0.42), malnourished children  
3 (1.3) and children with persistent diarrhoea (2.85) in the Gambia<sup>60</sup>. It also provides  
4 >80% power to detect differences of at least 0.1 in the mean change in LM ratio from  
5 enrolment (assuming SD for change=0.23 and 7% missing samples). For  
6 inflammatory markers, comparing 100 versus 100 children with two-sided  
7 alpha=0.025 provides >80% power to detect differences in mean log<sub>10</sub> concentrations  
8 of at least 0.44 times their standard deviation, or 2.75-fold differences between  
9 groups. Inclusion of well-nourished controls provides an indication of normal ranges  
10 in young African children. HIV-positive and HIV-negative SAM groups will be  
11 stratified to include approximately 50 children with and without oedematous  
12 malnutrition, if possible.

#### 14 *Microbiota and metabolomics substudy*

15 Power calculations are difficult in metagenomics and metabolomic analyses due to  
16 the large number of observed outcomes and unknown effect sizes and variance.  
17 Previous studies using smaller sample sizes have identified significant taxonomic  
18 differences in twin pairs discordant for oedematous-SAM (n=13)<sup>25</sup> and metabolic  
19 differences between the two forms of SAM (n=40)<sup>26</sup>. These studies suggest that a  
20 difference of 50% in metabolites could be expected. Using ANCOVA, setting  $\alpha=0.05$   
21 and assuming either low ( $\rho=0.1$ ) or high ( $\rho=0.7$ ) correlation, the study would require  
22 95-126 subjects to achieve 80% power<sup>61</sup>. False discovery rate (FDR) multiple  
23 correction testing will be applied to reduce the high-dimensionality of the data and  
24 limit false-positives.

#### 26 *Immunology substudy*

27 Up to 200 children with SAM and 200 well-nourished controls will be included in a  
28 cross-sectional analysis of innate immune cell function during hospitalisation.

1  
2  
3 1 Assuming similar infectious mortality to a recent Kenyan study (15%)<sup>17</sup>, a cohort of  
4  
5 200 provides 80% power to detect associations between immune profiles and  
6  
7 3 infectious mortality at an odds ratio of 1.7 and 2-sided alpha of 0.05. We will aim for  
8  
9 4 100 children with longitudinal analysis of innate immune cell function at discharge,  
10  
11 5 12, 24 and 48 weeks post-discharge<sup>17</sup>.  
12  
13 6

## 7 **STUDY OUTCOMES AND RISK FACTORS**

8 The main study outcomes are clinical (mortality, morbidity and relapse of  
9 malnutrition) and nutritional (weight, height, mid-upper arm circumference, leg length,  
10 head circumference, mid-thigh circumference, skin-fold thickness and body  
11 composition by bioimpedance vector analysis) assessed over 48 weeks of follow-up.  
12 Mortality is assessed in hospital by daily physician review and, post-discharge,  
13 through study visits and by telephone where possible for children who are lost to  
14 follow-up. Morbidity during hospitalization is assessed through daily clinical  
15 assessments and available hospital laboratory tests. Morbidity after discharge is  
16 assessed, first, using daily morbidity diaries, in which caregivers record episodes of  
17 illness (lethargy interfering with feeding; respiratory distress; diarrhoea; oedema and  
18 fever); second, from caregiver recall and review of handheld medical records at each  
19 follow-up visit; and, third, from data collected during hospitalization for children who  
20 are readmitted during the follow-up period. Time-to-recovery from malnutrition will be  
21 evaluated during hospitalization; relapse of malnutrition during follow-up will be  
22 categorized as moderate acute malnutrition, uncomplicated SAM and complicated  
23 SAM, according to WHO definitions. Nutritional outcomes will be expressed both as  
24 continuous variables (attained Z-score and change in Z-score between visits), and as  
25 categorical variables (moderate wasting, WHZ<-2; severe wasting, WHZ<-3;  
26 stunting, HAZ<-2; severe stunting, HAZ<-3; underweight, WAZ <-2; and  
27 microcephaly, head circumference-for-age <-2).  
28

1  
2  
3 1 Risk factors will be evaluated at baseline, hospital discharge and over the period of  
4  
5 2 follow-up for associations with clinical and nutritional outcomes. In addition to  
6  
7 3 baseline clinical and demographic factors, the following laboratory parameters will be  
8  
9 4 evaluated: haemoglobin, serum albumin, C-reactive protein, CD4 count and HIV viral  
10  
11 5 load (for HIV-positive children). Haemoglobin, CD4 and HIV-viral load will be  
12  
13 6 measured in real time and the results reviewed during follow-up clinics.  
14  
15 7

16  
17 8 Data on potential confounders are collected at baseline, discharge and during the  
18  
19 9 follow-up period, including child feeding practices, household socioeconomic status  
20  
21 10 (defined by household income and cooking method), maternal employment and  
22  
23 11 education, and household factors such as water, sanitation and hygiene practices,  
24  
25 12 availability of electricity, location (rural, peri-urban or urban) and household size.  
26  
27 13

## 28 14 **ANALYSIS**

29  
30  
31 15 All analyses will be interpreted exploratively since HOPE-SAM is an observational  
32  
33 16 study with multiple risk factors, outcomes and substudies. For all analyses, P values  
34  
35 17 will not be artificially adjusted, but interpreted as exploring the strength of evidence  
36  
37 18 supporting any association. The only exception is the use of approaches to minimise  
38  
39 19 false discovery when analysing high-dimensional data from the microbiota and  
40  
41 20 metabolomics substudies, as described.  
42  
43 21

### 44 22 *Observational Cohort*

45  
46 23 The primary comparison will be the clinical and nutritional outcomes of children with  
47  
48 24 HIV-SAM compared to HIV-negative children with SAM. We will review all deaths  
49  
50 25 and adjudicate clinical diagnoses and causes of death to ensure robust and  
51  
52 26 consistent data across sites. We will compare each participant's clinical management  
53  
54 27 to WHO guidelines to identify any contributory factors in hospital care. Factors  
55  
56 28 associated with outcomes during hospitalisation (e.g. mortality, nutritional recovery)



1 will be determined for each group (HIV-SAM and HIV-negative children with SAM)  
2 using multivariable analysis (Cox models for time-to-event data, linear models for  
3 continuous outcomes). Factors associated with outcomes over 48 weeks post-  
4 discharge (hospital re-admission, morbidity and mortality, relapse, anthropometry,  
5 body composition and response to ART) will be determined for each group (HIV-SAM  
6 and HIV-negative children with SAM) using multivariable analysis (Cox models for  
7 time-to-event data, linear models for continuous outcomes). HIV-positive children  
8 with SAM and HIV-negative children with SAM will be included in one model together  
9 with the risk factors, and interaction tests will be used to investigate whether  
10 associations between risk factors and outcomes differ between the two groups of  
11 children. We will evaluate the ability of mid-upper arm circumference (MUAC) at  
12 discharge to predict long-term outcomes using receiver-operator-characteristic  
13 (ROC) analysis, in the whole cohort and within the subgroups of HIV-SAM and HIV-  
14 negative children with SAM. We will then evaluate whether addition of other variables  
15 improves the predictive capacity of MUAC (using WHO criteria in those >6 months  
16 old, and published data for children <6 months<sup>62</sup>) for each group, including body  
17 composition, haemoglobin, albumin and CRP, plus CD4%, viral load and timing of  
18 ART initiation (HIV-SAM only). We will construct multivariable models and compare  
19 them with MUAC alone using the net-reclassification index.

#### 21 *Body composition analysis*

22 Previous work in body composition by bio-electrical impedance in Ethiopian infants  
23 and children with SAM has shown that the conventional approach, predicting total  
24 body weight from height-adjusted impedance, fails due to confounding by oedema<sup>63</sup>.  
25 The same project validated an alternative approach, known as Bio-electrical  
26 Impedance Vector Analysis (BIVA), and described significant differences between  
27 each of three groups: healthy controls, oedematous-SAM and non-oedematous  
28 SAM. Vector analysis splits impedance into two height-adjusted components,

1 resistance and reactance, which are further linked through phase angle (PA).  
2 Variability in these components is associated with biochemical parameters<sup>64</sup>. These  
3 variables will be explored using graphical analysis, or transformed into age- and sex-  
4 adjusted Z-scores for statistical comparison, including longitudinal analyses. Higher  
5 phase angle indicates better nutritional status, while declining height-adjusted  
6 resistance over time indicates loss of oedema.

### 7 8 *Enteropathy substudy*

9 The primary comparison for the enteropathy substudy will be between HIV-positive  
10 children with SAM (group A) and HIV-negative children with SAM (group C), stratified  
11 by presence or absence of oedema. Control groups (B and D) are well-nourished  
12 children with or without HIV, to provide normative data for biomarkers and to  
13 evaluate the impact of SAM within each HIV group. Thus, biomarkers among HIV-  
14 positive children with SAM will first be compared to HIV-negative children with SAM  
15 (to evaluate the impact of HIV) and, second, to well-nourished HIV-positive children  
16 (to evaluate the impact of SAM). Biomarkers among HIV-negative children with SAM  
17 will be compared to well-nourished HIV-negative children. For each continuous  
18 outcome, simple descriptive analysis will be used to compare groups during  
19 hospitalisation using t-tests on appropriately transformed data. For any outcome with  
20 moderate ( $p < 0.05$ ) evidence of difference between either group a regression model  
21 will be constructed including groups A, B, C, D to directly test (using interactions)  
22 whether there is a synergistic effect of HIV-SAM versus HIV-negative SAM versus  
23 HIV alone versus neither. These models will also be used to explore whether there is  
24 any evidence for heterogeneity in effects between oedematous and non-oedematous  
25 SAM. Associations between enrolment factors (e.g. intestinal permeability and  
26 microbial translocation) will be explored using pairwise Spearman correlations and  
27 principal components analysis. Mean changes at the follow-up time-points in each  
28 group will be estimated, and groups compared (as above) using generalised

1  
2  
3 1 estimating equations. For outcomes that differ across SAM groups over time,  
4  
5 2 multilevel models will be used to explore possible predictors from the other factors  
6  
7 3 measured. Time to nutritional recovery will be compared using Kaplan-Meier and log-  
8  
9 4 rank tests, and Cox models to adjust for baseline differences between groups.

10  
11 5  
12 6 *Microbiota and metabolomics substudy*

13  
14 7 The primary comparison will be between HIV-negative children with oedematous and  
15  
16 8 non-oedematous SAM, with a separate comparison between HIV-positive children  
17  
18 9 with SAM and HIV-negative children with SAM. Analyses will examine: (i) differences  
19  
20 10 in metagenomic/metabolomic variables between groups at each time-point; (ii)  
21  
22 11 differences in metagenomic/metabolomic variables within groups over time; (iii)  
23  
24 12 correlations between metagenomic and metabolomic variables; and (iv) correlations  
25  
26 13 between metagenomic/metabolomic variables and clinical outcomes. A systematic  
27  
28 14 analysis will be undertaken to reduce high-dimensional data, integrate the multi-  
29  
30 15 omics datasets and minimise false discovery.

31  
32 16  
33  
34 17 Compositional metagenomic data will be compared between groups for indices of  
35  
36 18 alpha and beta diversity. Principal coordinate analysis and partial least squares  
37  
38 19 discriminant analysis will be performed on metabolomics data to identify overall  
39  
40 20 differences between groups. High-dimensional datasets will be reduced using  
41  
42 21 random forest models to identify taxa, microbial gene families and metabolites that  
43  
44 22 most strongly contribute to differences between groups, corrected by Benjamani-  
45  
46 23 Hochburg false discovery rate detection. Targeted analysis by qRT-PCR will validate  
47  
48 24 differential abundance or expression of candidate microbial genes. Longitudinal  
49  
50 25 comparisons will be performed within and between groups using multilevel  
51  
52 26 simultaneous component analysis. Orthogonal projections to latent structures models  
53  
54 27 will integrate metabolomic and metagenomic data whilst linear regression, canonical  
55  
56 28 correlation and hierarchal clustering analysis will measure correlations between -

1  
2  
3 1 omics datasets. Finally, ROC analysis will identify the ability of different analytes to  
4  
5 2 predict long-term nutritional and clinical outcomes.

6  
7 3  
8  
9 4 *Immunology substudy*

10  
11 5 Integrated profiles of innate immune cell function will be generated for each child  
12  
13 6 using principal components analysis followed by hierarchical clustering<sup>65 66</sup>. This  
14  
15 7 data-reduction method identifies whether absolute levels of specific markers or  
16  
17 8 relative differences between markers differentiate children into groups. The resulting  
18  
19 9 innate immune profiles will be compared between HIV-SAM, HIV-negative children  
20  
21 10 with SAM and well-nourished groups using univariable tests and multivariable  
22  
23 11 analysis of variance (MANOVA) of the principal components.

24  
25 12  
26  
27 13 To address the relationship between immune function and infections, regression  
28  
29 14 analyses will determine whether baseline innate immune profiles (or the individual  
30  
31 15 parameters defining them) are associated with the infectious morbidity or mortality  
32  
33 16 during hospitalisation, using logistic models for binary outcomes and linear models  
34  
35 17 for duration. Key clinical characteristics, including age, sex, oedema and baseline  
36  
37 18 WHZ, will be added to models to investigate their confounding effects. Multivariable  
38  
39 19 stacked regression methods will be used to compare the impact of different factors  
40  
41 20 on severe bacterial infections based on heterogeneity tests.

42  
43 21  
44  
45 22 To determine whether treatment for SAM restores innate immune cell antibacterial  
46  
47 23 function, mixed effects regression models will compare longitudinal changes in  
48  
49 24 individual immune parameters, and the principal components calculated from the  
50  
51 25 weights identified at baseline (which include well-nourished controls). Similarities and  
52  
53 26 differences in longitudinal immune profiles will be compared between groups using  
54  
55 27 nonmetric multi-dimensional scaling<sup>65 67 68</sup>. This approach will group children  
56  
57 28 according to their composite innate immune function, allowing the duration and

1  
2  
3 1 variability of immune restoration to be evaluated over the course of nutritional  
4  
5 2 rehabilitation. Binary logistic regression will determine whether innate immune  
6  
7 3 profiles at discharge are associated with morbidity or mortality during follow-up.  
8  
9 4

## 10 5 **PATIENT AND PUBLIC INVOLVEMENT**

11  
12 6 Patients and their caregivers were not involved in the design of the study. During  
13  
14 7 recruitment, all caregivers of children admitted to hospital were given information  
15  
16 8 about the study; those whose children had severe acute malnutrition were  
17  
18 9 approached to give written informed consent. A meeting to disseminate results of the  
19  
20 10 study to participants and their caregivers will be held at the end of the study. An  
21  
22 11 interactive game to engage caregivers in the science underlying malnutrition is being  
23  
24 12 developed in collaboration with experts from the Centre of the Cell, a unique science  
25  
26 13 education centre based at Queen Mary University of London  
27  
28 14 (<https://www.centreofthecell.org/>).  
29  
30  
31  
32  
33  
34  
35

## 36 17 **SAFETY REPORTING**

37  
38 18 For all adverse events, the study team will assess expectedness and relatedness to  
39  
40 19 study activities. Since this is an observational study without interventions, we  
41  
42 20 anticipate that the risk is minimal; however, serious adverse events will be reported  
43  
44 21 to local ethical review boards (Medical Research Council of Zimbabwe, and  
45  
46 22 University of Zambia Biomedical Research Ethics Committee) and the study sponsor  
47  
48 23 (Queen Mary University of London) according to their respective guidelines.  
49  
50

## 51 25 **DATA COLLECTION AND MONITORING**

52  
53 26 Clinical and demographic data are recorded on paper case report forms. All data are  
54  
55 27 checked for completeness and plausibility before data entry and problems flagged for  
56  
57 28 resolution by the clinical team. All data are double-entered onto a dedicated  
58  
59  
60

1 password-protected online study database, and any discrepancies resolved. Study  
2 participants are identified on electronic databases only by study numbers (assigned  
3 at enrolment); no personal identifiers are entered.

## 4 5 **ETHICS AND DISSEMINATION**

6 The study complies with the principles of the Declaration of Helsinki (2008) and is  
7 conducted in compliance with the principles of Good Clinical Practice (GCP) and  
8 local regulatory requirements in each country. Ethical approval was obtained from the  
9 University of Zambia Biomedical Research Ethics Committee, the Joint Research  
10 Ethics Committee of the University of Zimbabwe and the Medical Research Council of  
11 Zimbabwe. The ethical review board of the Sponsor, Queen Mary University of  
12 London, provided an advisory review of the study. Since this is an observational study,  
13 there is no Data and Safety Monitoring Board.

14  
15 Results will be disseminated through conference abstracts and peer-reviewed  
16 publications and discussed with relevant policymakers and programmers. Study  
17 findings will be disseminated to families of participants at face-to-face meetings.

## 18 19 **TIME FRAME AND STUDY STATUS**

20 Enrolment into the study began in July 2016 and is expected to end in March 2018.  
21 All participants will be followed for 48 weeks, with an expected study completion date  
22 of March 2019.

## 23 24 **DISCUSSION**

25 HOPE-SAM aims to document the short- and long-term clinical and nutritional  
26 outcomes of HIV-positive and HIV-negative children with SAM, and to identify the  
27 factors at presentation and at discharge from hospital that independently predict  
28 these outcomes. Mechanistic substudies aim to evaluate the contribution of

1 enteropathy, microbiota, metabolome and innate immune cell function to these  
2 clinical outcomes. The prevalence of malnutrition in HIV-positive children is as high  
3 as 40% in some settings and the challenges of managing this population are well  
4 recognised<sup>69</sup>. The WHO protocol on management of SAM aims to reduce case  
5 fatality below 10%, but rates as high as 35% are still reported among HIV-positive  
6 children<sup>5 70</sup>. No studies have systematically and longitudinally collected morbidity  
7 data in HIV-SAM, or documented repeat hospitalisations and mortality after  
8 discharge from hospital, particularly in the current era where ART is available upon  
9 diagnosis. HOPE-SAM will provide a unique opportunity to enrol and follow a cohort  
10 of children managed for SAM in three large hospitals across two sub-Saharan  
11 African countries at several time-points over a one-year period. Nested longitudinal  
12 laboratory substudies aim to better characterise the pathogenesis of SAM in HIV-  
13 positive and HIV-negative children, to determine whether pathogenic processes are  
14 normalised during nutritional rehabilitation and follow-up, and to identify potential  
15 mechanistic pathways. Our ultimate goal is to utilise the findings generated in this  
16 study to inform new intervention approaches that can be evaluated in clinical trials to  
17 improve outcomes among children with SAM.

## 19 **ACKNOWLEDGEMENTS**

20 Members of the HOPE-SAM study team not listed in the author list: *Harare,*  
21 *Zimbabwe:* Virginia Sauramba, Adlight Dandadzi, Chipso Kureva, Johnson Mushonga,  
22 Eddington Mpfu, Washington Dune, Tafadzwa Chidhanguro, Sibongile Nkiwane,  
23 Sandra Rukobo, Margaret Govha, Patience Mashayanembwa, Leah Chidamba,  
24 Bernard Chasekwa, Joice Tome, Rachel Makasi, Wellington Murenjekekwa,  
25 Theodore Chidawanyika, Blessing Tsenesa, Stephen Moyo, Penias Nyamwino,  
26 Pururudzai Simango, Shepherd Seremwe, Lovemore Chingaoma and Sarudzai  
27 Kasaru. *Lusaka, Zambia:* Andreck Tembo, Mary Mpundu, Evelyn Nyendwa,  
28 Gwendolyn Nayame, Dalitso Tembo, Sophreen Mwaba, Esther Chilala, Lucy

1  
2  
3 1 Macwani, Tenzeni Dumba, Miyoba Chipunza, Lydia Kazhila, Temwaninge Gondwe,  
4  
5 2 Dennis Phiri, Mpala Mwanza, Kanekwa Zyambo.

6  
7 3  
8  
9 4 We thank Philippa Rambanepasi, Karen Gwanzura and Agatha Muyenga for  
10  
11 5 financial management of the study; Zinah Sorefan and Daniela Azurunwa for study  
12  
13 6 coordination at Queen Mary University of London; Professor Kim Michaelsen for the  
14  
15 7 use of the electronic knemometers and advice on their use; and we remember the  
16  
17 8 hard work of Edith Mukusho who sadly passed away during the HOPE-SAM study.

18  
19 9 We thank the staff and management and members of the Department of Paediatrics  
20  
21 10 and Child Health at the three hospital sites who have made this study possible. We  
22  
23 11 are indebted to the caregivers, families and children who are participating in the  
24  
25 12 HOPE-SAM study.

26  
27 13  
28  
29  
30  
31  
32  
33  
34  
35  
36  
37  
38  
39  
40  
41  
42  
43  
44  
45  
46  
47  
48  
49  
50  
51  
52  
53  
54  
55  
56  
57  
58  
59  
60



## 1 AUTHOR CONTRIBUTIONS

2 *Designed study:* MB-D, BA, CDB, RCR, BM, KC, CK, KCh, DN, PC, NC, FM, JW,

3 ARM, JS, ASW, KJN, PK, AJP

4 *Sought funding:* MB-D, BA, CDB, RCR, JHH, ARM, JS, ASW, KJN, PK, AJP

5 *Undertaking study:* BM, KC, CK, KCh, FM, DN, PC, NC, FM, IM, EB, KM, SM, TR

6 *Study oversight:* MB-D, BA, JHH, KJN, PK, AJP

7 *Analysis:* MB-D, BA, CDB, RCR, RN, JW, ARM, JS, ASW, KJN, PK, AJP

8 *Wrote first draft of manuscript:* MB-D, CDB, RCR, AJP

9 *Critically revised manuscript:* All

10

## 11 FUNDING

12 This work was supported by the Medical Research Council UK (MR/K012711/1), the

13 Wellcome Trust (107634/Z/15/Z to MB-D; 206225/Z/17/Z to CDB, an award funded in

14 partnership with the Royal Society; 206455/Z/17/Z to RCR; and 108065/Z/15/Z to

15 AJP), and a Bio-Resource Grant from the Centre for Genomic Health within the Life

16 Sciences Initiative at Queen Mary University of London.

17

## 18 COMPETING INTERESTS

19 None of the authors have any competing interests to declare.

20

21

22

23

24

25

26

27

28

1

2

3

4

5

6

7

8

9

10

11

12

13

14

15

16

17

18

19

20

21

22

23

24

25

26

27

28

29

30

## References

1. Black R E, Victora C G, Walker S P, et al. Maternal and child undernutrition and overweight in low-income and middle-income countries  
. *Lancet* 2013;382:427–51.
2. World Health Organisation G. Guideline Updates on the management of severe acute malnutrition in infants and children: World Health Organisation, Geneva, 2013.
3. Lenters LM, Wazny K, Webb P, et al. Treatment of severe and moderate acute malnutrition in low- and middle-income settings: a systematic review, meta-analysis and Delphi process. *BMC Public Health* 2013;13 (Supp 3):S23.
4. Golden MHN. Oedematous malnutrition. *British Medical Bulletin* 1998;54(2):433-44.
5. Schofield C, A. A. Why have mortality rates for severe malnutrition remained so high? *Bull World Health Organ* 1996;74(2):223-29.
6. Munthali T, Jacobs C, Sitali L, et al. Mortality and morbidity patterns in under-five children with severe acute malnutrition (SAM) in Zambia: a five-year retrospective review of hospital-based records (2009–2013). *Archives of Public Health* 2015;73(23)
7. Preidis G A, McCollum E D, Mwansambo C, et al. Pneumonia and Malnutrition are Highly Predictive of Mortality among African Children Hospitalized with Human Immunodeficiency Virus Infection or Exposure in the Era of Antiretroviral Therapy. *Journal of Pediatrics* 2011;159(3):484-89.
8. World Health Organisation G. Global guidance on criteria and processes for validation: Elimination of Mother-to-Child transmission of HIV and Syphilis. Geneva: World Health Organization, 2017.
9. Evans C, Jones CE, Prendergast AJ. HIV-exposed, uninfected infants: new global challenges in the era of paediatric HIV elimination  
. *Lancet Infectious Diseases* 2016 doi: 10.1016/S1473 [published Online First: March 31,2016]
10. Heikens GT, Bunn J, Amadi A, et al. Case management of HIV-infected severely malnourished children: challenges in the area of highest prevalence. *Lancet* 2008;371:1305-7.
11. Kerac M, Bunn J, George Chagaluka G, et al. Follow-Up of Post-Discharge Growth and Mortality after Treatment for Severe Acute Malnutrition (FuSAM Study): A Prospective Cohort Study. *Plos One* 2014;9(6)
12. Lelijveld M, Seal A, Wells J C, et al. Chronic disease outcomes after severe acute malnutrition in Malawian children (ChroSAM): a cohort study. *Lancet Global Health* 2016;4:e654-62.
13. Moisi JC, Gatakaa H, Berkley JA, et al. Excess child mortality after discharge from hospital in Kilifi, Kenya: a retrospective cohort analysis. *Bull World Health Organ* 2011;89:725-32A.

- 1 14. Wiens MO, Pawluk S, Kisson N, et al. Pediatric Post-Discharge Mortality in  
2 Resource Poor Countries: A Systematic Review. *Plos One* 2013;8(6)
- 3 15. Ngari MM, Fegan G, Mwangome MK, et al. Mortality after Inpatient Treatment  
4 for Severe Pneumonia in Children: a Cohort Study. *Paediatric and*  
5 *Perinatal Epidemiology* 2017;31:233-42.
- 6 16. Fergusson P, Chinkhumba J, Grijalva-Eternod C, et al. Nutritional recovery in  
7 HIV-infected and HIVuninfected children with severe acute malnutrition.  
8 *Archives of Diseases in Children* 2009;94:512-16.
- 9 17. Berkley JA, Ngari M, Johnstone T, et al. Daily co-trimoxazole prophylaxis to  
10 prevent mortality in children with complicated severe acute malnutrition:  
11 a  
12 multicentre, double-blind, randomised placebo-controlled trial. *Lancet Global*  
13 *Health* 2016;4(7):e464 - e73
- 14 18. DeBoer M D, Lima A A M, Oría R B, et al. Early childhood growth failure and  
15 the developmental origins of adult disease: Do enteric infections and  
16 malnutrition increase risk for the metabolic syndrome? *Nutrition Reviews*  
17 2012 70(11):642-53.
- 18 19. Barouki R, Gluckman P D, Grandjean P, et al. Developmental origins of non-  
19 communicable disease: Implications for research and public health.  
20 *Environmental Health* 2012;11(42)
- 21 20. Davey Smith G, Greenwood R, Gunnell D, et al. Leg length, insulin resistance,  
22 and coronary heart disease risk: The Caerphilly Study. *Journal of*  
23 *Epidemiology Community Health* 2001;55:867-72.
- 24 21. Gunnell D, Whitley E, Upton MN, et al. Associations of height, leg length, and  
25 lung function with cardiovascular risk factors in the Midspan Family  
26 Study. *Journal of Epidemiology Community Health* 2002;57:141-46.
- 27 22. Jones K D, Thitiri J, Ngari M, et al. Childhood malnutrition: Toward an  
28 understanding of infections, inflammation, and antimicrobials. *Food and*  
29 *Nutrition Bulletin* 2014;35(2)
- 30 23. Attia S, Versloot CJ, Voskuil W, et al. Mortality in children with complicated  
31 severe acute malnutrition is related to intestinal and systemic  
32 inflammation: an observational cohort study. *American Journal of Clinical*  
33 *Nutrition* 2016;104:1441-9.
- 34 24. Bourke CD, Berkley J A, Prendergast AJ. Immune Dysfunction as a Cause and  
35 Consequence of Malnutrition. *Trends in Immunology* 2016;37(6):386-89.
- 36 25. Smith MI, Yatsunenko T, Manary MJ, et al. Gut microbiomes of Malawian twin  
37 pairs discordant for kwashiorkor. *Science* 2013;339(6119):548-54.
- 38 26. Di Giovanni V, Bourdon C, Wang DX, et al. Metabolomic Changes in Serum of  
39 Children with Different Clinical Diagnoses of Malnutrition. *Journal of*  
40 *Nutrition* 2016;146:2436-44.
- 41 27. Rytter MJH, Kolte L, Briend A, et al. The Immune System in Children with  
42 Malnutrition—A Systematic Review. *Plos One* 2014;9(8)
- 43 28. Blanton LV, Charbonneau MR, Salih T, et al. Gut bacteria that prevent growth  
44 impairments transmitted by microbiota from malnourished children.  
45 *Science* 2016;351(6275)
- 46 29. Subramanian S, Huq S, Yatsunenko T, et al. Persistent gut microbiota  
47 immaturity in malnourished Bangladeshi children. *Nature*  
48 2014;510(7505):417-21.

- 1  
2  
3 1 30. Prendergast A, Kelly P. Review: Enteropathies in the developing world:  
4 2 neglected effects on global health. *Am J Trop Med Hyg* 2012;86:756-63.  
5 3 31. Lutwama F, Kagina BM, Wajja A, et al. Distinct T-Cell Responses When BCG  
6 4 Vaccination Is Delayed From Birth to 6 Weeks of Age in Ugandan Infants.  
7 5 *The Journal of Infectious Diseases* 2014;209(6):887-97.  
8 6 32. Prendergast AJ, Humphrey JH, Mutasa K, et al. Assessment of Environmental  
9 7 Enteric Dysfunction in the SHINE Trial: Methods and Challenges. *Clin*  
10 8 *Infect Dis* 2015;61 (suppl 7):S685-702.  
11 9 33. World Health Organisation G. Management of severe malnutrition : a manual  
12 10 for physicians and other senior health workers. 1999  
13 11 34. World Health Organisation G. Consolidated guidelines on the use of  
14 12 antiretroviral drugs for treating and preventing HIV infection:  
15 13 Recommendations for a public health approach. 2016.  
16 14 35. Costiniuk CT, JB. A. Human immunodeficiency virus and the gastrointestinal  
17 15 immune system: does highly active antiretroviral therapy restore gut  
18 16 immunity? *Nature* 2012;5(6):596-604.  
19 17 36. Brenchley JM, Douek DC. HIV infection and the gastrointestinal immune  
20 18 system  
21 19  
22 20  
23 21  
24 22  
25 23  
26 24  
27 25 . *Nature* 2008;1(1) doi: doi:10.1038/mi.2007.1  
28 26  
29 27 37. Amadi B, Besa E, Zyambo K, et al. Impaired Barrier Function and  
30 28 Autoantibody Generation in Malnutrition Enteropathy in Zambia.  
31 29 *EBioMedicine* 2017;22(Supplement C):191-99. doi:  
32 30 <https://doi.org/10.1016/j.ebiom.2017.07.017>  
33 31  
34 32 38. Kau AL, Ahern PP, Griffin NW, et al. Human nutrition, the gut microbiome and  
35 33 the immune system. *Nature* 2011;474(7351):327-36.  
36 34 39. Kau AL, Planer JD, Liu J, et al. Functional characterization of IgA-targeted  
37 35 bacterial taxa from undernourished Malawian children that produce diet-  
38 36 dependent enteropathy. *Sci Transl Med* 2015;7(276):276ra24. doi:  
39 37 10.1126/scitranslmed.aaa4877  
40 38  
41 39 40. Monaco CL, Gootenberg DB, Zhao G, et al. Altered Virome and Bacterial  
42 40 Microbiome in Human Immunodeficiency Virus-Associated Acquired  
43 41 Immunodeficiency Syndrome. *Cell Host Microbe* 2016;19(3):311-22. doi:  
44 42 10.1016/j.chom.2016.02.011  
45 43 41. Amadi B, Fagbemi AO, Kelly P, et al. Reduced production of sulfated  
46 44 glycosaminoglycans occurs in Zambian children with kwashiorkor but not  
47 45 marasmus. *Am J Clin Nutr* 2009;89(2):592-600. doi:  
48 46 10.3945/ajcn.2008.27092  
49 47 42. Segata N, Waldron L, Ballarini A, et al. Metagenomic microbial community  
50 48 profiling using unique clade-specific marker genes. *Nature methods*  
51 49 2012;9(8):811-4. doi: 10.1038/nmeth.2066 [published Online First:  
52 50 2012/06/13]  
53 51 43. Abubucker S, Segata N, Goll J, et al. Metabolic reconstruction for metagenomic  
54 52 data and its application to the human microbiome. *PLoS computational*  
55 53 *biology* 2012;8(6):e1002358. doi: 10.1371/journal.pcbi.1002358  
56 54 [published Online First: 2012/06/22]  
57 55  
58 56  
59 57  
60 58

- 1  
2  
3 1 44. Bartz S, Mody A, Hornik C, et al. Severe Acute Malnutrition in Childhood:  
4 2 Hormonal and Metabolic Status at Presentation, Response to Treatment  
5 3 and Predictors of Mortality. *Journal of Clinical and Endocrine Metabolism*  
6 4 2014;99(6):2128-37.
- 7 5 45. Farras M, Chandwe K, Mayneris-Perxachs J, et al. Characterizing the  
8 6 metabolic phenotype of intestinal villus blunting in Zambian children  
9 7 with severe acute malnutrition and persistent diarrhoea. *Plos One*  
10 8 2018;13(3) doi: doi.org/10.1371/journal.pone.0192092
- 11 9 46. Mayneris-Perxachs J, Lima AA, Guerrant RL, et al. Urinary N-  
12 10 methylnicotinamide and  $\beta$ -aminoisobutyric acid predict catch-up growth  
13 11 in undernourished Brazilian children. *Sci Rep* 2016;6:19780. doi:  
14 12 10.1038/srep19780
- 15 13 47. Manary MJ, Leeuwenburgh C, Heinecke JW. Increased oxidative stress in  
16 14 kwashiorkor. *J Pediatr* 2000;137(3):421-4. doi:  
17 15 10.1067/mpd.2000.107512
- 18 16 48. Chisti MJ, Salam MA, Bardhan PK. Severe Sepsis in Severely Malnourished  
19 17 Young Bangladeshi Children with Pneumonia: A Retrospective Case  
20 18 Control Study. *Plos One* 2015;10(10):e0139966.
- 21 19 49. Page A-L, de Rekeneire N, Sayadi S, et al. Infections in children admitted with  
22 20 complicated severe acute malnutrition in Niger. *Plos One* 2013;8(7)
- 23 21 50. Jones KDJ, A BJ. Severe acute malnutrition and infection. *Paediatrics and*  
24 22 *International Child Health* 2014;34(sup 1):S1-S29. doi: DOI:  
25 23 10.1179/2046904714Z.000000000218
- 26 24 51. Bahwere P, Levy J, Philippe H, et al. Community-Acquired Bacteremia among  
27 25 Hospitalized Children in Rural Central Africa. *International Journal of*  
28 26 *Infectious Diseases* 2001;5:180-88.
- 29 27 52. Thuo N, Ohuma E, Karisa J, et al. The prognostic value of dipstick urinalysis in  
30 28 children admitted to hospital with severe malnutrition. *Archives of*  
31 29 *Diseases in Childhood* 2010;95(6):422-6.
- 32 30 53. Berkley J A, Lowe BS, Mwangi I, et al. Bacteremia among Children admitted to  
33 31 a rural Hospital in Kenya. *New England Journal of Medicine* 2005;352:39-  
34 32 47.
- 35 33 54. Chang CY, Trehan I, Wang R J, et al. Children Successfully Treated for  
36 34 Moderate Acute Malnutrition Remain at Risk for Malnutrition and Death  
37 35 in the Subsequent Year after Recovery. *Journal of Nutrition* 2013;143:215-  
38 36 20.
- 39 37 55. Ibrahim MK, Zambruni M, Melby CL, et al. Impact of Childhood Malnutrition  
40 38 on Host Defense and Infection. *Clinical Microbiology Reviews*  
41 39 2017;30(4):919-71.
- 42 40 56. Hughes SM, Amadi B, Mwiya M, et al. Dendritic cell anergy results from  
43 41 endotoxemia in severe malnutrition. *Journal of Immunology*  
44 42 2009;183(4):2818-26.
- 45 43 57. Jones K. D, Hüntten-Kirsch B, Laving AM, et al. Mesalazine in the initial  
46 44 management of severely acutely malnourished children with  
47 45 environmental enteric dysfunction: a pilot randomized controlled trial.  
48 46 *BMC Med* 2014;12 doi: 10.1186/s12916-014-0133-2
- 49 47 58. Watanabe K, A. PJW. Environmental Enteropathy: Elusive but Significant  
50 48 Subclinical Abnormalities in Developing Countries. *EBioMedicine*  
51 49 2016;10:25-32.

- 1  
2  
3 1 59. Kelly P, Besa E, Zyambo K. Endomicroscopic and Transcriptomic Analysis of  
4 2 Impaired Barrier Function and Malabsorption in Environmental  
5 3 Enteropathy. . *Plos Neglected Tropical Diseases* 2016;10(4):e00046000.  
6 4 60. Behrens RH, Lunn PG, Northrop CA, et al. Factors affecting the integrity of the  
7 5 intestinal mucosa of Gambian children. *American Journal of Clinical*  
8 6 *Nutrition* 1987;45:1433-41.  
9 7 61. Borm GF, Fransen J, WA L. A simple sample size formula for analysis of  
10 8 covariance in randomized clinical trials. *Journal of Clinical Epidemiology*  
11 9 2007;60(12):1234-8.  
12 10 62. Mwangome M, Ngari M, Fegan G, et al. Diagnostic criteria for severe acute  
13 11 malnutrition among infants aged under 6 mo. *The American journal of*  
14 12 *clinical nutrition* 2017;105(6):1415-23. doi: 10.3945/ajcn.116.149815  
15 13 [published Online First: 2017/04/21]  
16 14 63. Girma T, Kæstel P, Workeneh N, et al. Bioimpedance index for measurement  
17 15 of total body water in severely  
18 16 malnourished children: Assessing the effect of nutritional oedema. *Clinical*  
19 17 *Nutrition* 2015  
20 18 64. Girma T, Hother Nielsen AL, Kæstel P, et al. Biochemical and anthropometric  
21 19 correlates of bio-electrical impedance parameters in severely  
22 20 malnourished children: A cross-sectional study.  
23 21 . *Clinical Nutrition* 2017 doi: 10.1016/j.clnu.2017.02.017  
24 22 65. Bourke CD, Nausch N, Rujeni N, et al. Integrated Analysis of Innate, Th1, Th2,  
25 23 Th17, and Regulatory Cytokines Identifies Changes in Immune  
26 24 Polarisation Following Treatment of Human Schistosomiasis. *The Journal*  
27 25 *of Infectious Diseases* 2013;208(1):159-69.  
28 26 66. Prendergast AJ, Szubert AJ, Berejena C, et al. Baseline Inflammatory  
29 27 Biomarkers Identify Subgroups of HIV-Infected African Children With  
30 28 Differing Responses to Antiretroviral Therapy. *Journal of Infectious*  
31 29 *Diseases* 2016;214:226-36  
32 30 .  
33 31 67. Bourke CD, Mutapi F, Nausch N, et al. Trichuris suis ova therapy for allergic  
34 32 rhinitis does not affect allergen-specific cytokine responses despite a  
35 33 parasite-specific cytokine response. *Clinical and Experimental Allergy*  
36 34 2012;42:1582-95.  
37 35 68. Bourke CD, Nausch N, Rujeni N, et al. Cytokine Responses to the Anti-  
38 36 schistosome Vaccine Candidate Antigen Glutathione-S-transferase Vary  
39 37 with Host Age and Are Boosted by Praziquantel Treatment. *Plos Neglected*  
40 38 *Tropical Diseases* 2014;8(5)  
41 39 69. Fergusson P, Tomkins A. HIV prevalence and mortality among children  
42 40 undergoing treatment for severe acute malnutrition in sub-Saharan  
43 41 Africa: a systematic review and meta-analysis. *Transactions of the Royal*  
44 42 *Society of Tropical Medicine and Hygiene* 2009;103(6):541-48.  
45 43 70. Chinkhumba J, Tomkins A, Banda C, et al. The impact of HIV on mortality  
46 44 during in-patient rehabilitation of severely malnourished children in  
47 45 Malawi. *Transactions of the Royal Society of Tropical Medicine and Hygiene*  
48 46 2008;102(7):639-44.  
49 47  
50  
51  
52  
53  
54  
55 48

## FIGURE LEGENDS

### Figure 1: Study flow chart.

All hospital admissions are screened for eligibility for the observational cohort and enteropathy sub-study, with procedures undertaken as shown in the flow chart during hospitalisation and post-discharge. Well-nourished children from outpatient clinics and the community meeting eligibility criteria as well-nourished controls are enrolled and undergo a single baseline assessment as shown. The immunology, microbiota and metabolomics sub-studies enrol children as shown. All children with SAM, regardless of which arm of the study they are enrolled into, are followed for 48 weeks post-discharge.

<sup>1</sup>The immunology substudy started from 1<sup>st</sup> June 2017 and required children to have a blood sample >2mL to conduct cellular assays.

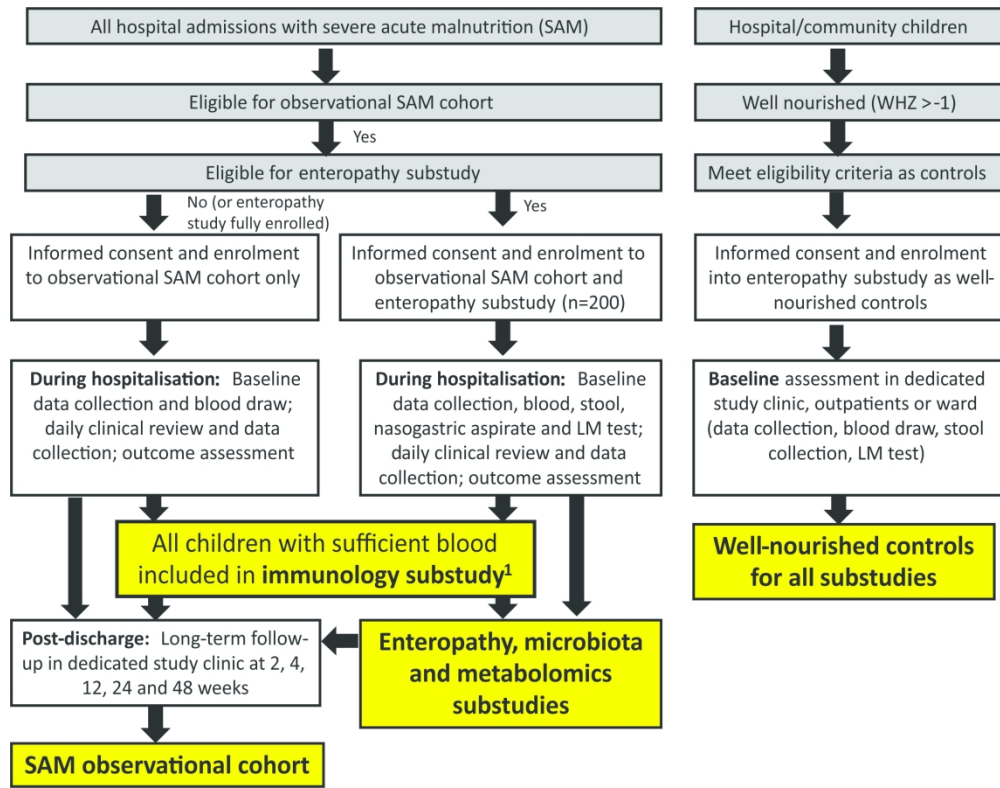

204x159mm (300 x 300 DPI)



**Supplementary Table 1: Assays undertaken on stored samples for children in the observational cohort and immunology substudy.**

| Sample type | Assay (method)                                                                                   | Location of work                    | Study subjects        | Baseline | Discharge | Week 12 | Week 24 | Week 48 |
|-------------|--------------------------------------------------------------------------------------------------|-------------------------------------|-----------------------|----------|-----------|---------|---------|---------|
| Blood       | HIV testing (rapid antibody test algorithm if >18 mo old or HIV DNA PCR <18 mo old) <sup>1</sup> | TROPGAN, Zvitambo or clinical sites | All                   | X        |           |         |         |         |
| Blood       | CD4 count (flow cytometry or PIMA) <sup>1</sup>                                                  | TROPGAN, Zvitambo or clinical sites | All HIV-positive      | X        | X         | X       | X       | X       |
| Plasma      | HIV viral load (real-time PCR) <sup>1</sup>                                                      | TROPGAN, Zvitambo or clinical sites | All HIV-positive      | X        | X         | X       | X       | X       |
| Plasma      | C-reactive protein (ELISA)                                                                       | TROPGAN, Zvitambo                   | All                   | X        | X         | X       | X       | X       |
| Plasma      | Albumin (ELISA)                                                                                  | TROPGAN, Zvitambo                   | All                   | X        | X         | X       | X       | X       |
| Plasma      | Lipopolysaccharide (LAL assay)                                                                   | TROPGAN and Zvitambo                | Subgroup <sup>3</sup> | X        | X         | X       | X       | X       |
| Plasma      | Lipopolysaccharide binding protein (LBP)                                                         | TROPGAN and Zvitambo                | Subgroup <sup>3</sup> | X        | X         | X       | X       | X       |
| Plasma      | sCD14 (ELISA)                                                                                    | TROPGAN and Zvitambo                | Subgroup <sup>3</sup> | X        | X         | X       | X       | X       |
| Plasma      | sCD163 (ELISA)                                                                                   | TROPGAN and Zvitambo                | Subgroup <sup>3</sup> | X        | X         | X       | X       | X       |
| Plasma      | IL-6, TNF-alpha, IL-1 $\beta$ (ELISA) and/or multiplex cytokines                                 | TROPGAN and Zvitambo                | Subgroup <sup>3</sup> | X        | X         | X       | X       | X       |
| Plasma      | Total PAMP activity (THP1 reporter cell line <sup>2</sup> )                                      | TROPGAN and Zvitambo                | Subgroup <sup>3</sup> | X        | X         | X       | X       | X       |
| Whole       | Molecular techniques                                                                             | QMUL, London <sup>2</sup>           | Subgroup <sup>3</sup> | X        | X         | X       | X       | X       |

|                                 |                                                                                                                            |                   |     |   |   |   |   |   |
|---------------------------------|----------------------------------------------------------------------------------------------------------------------------|-------------------|-----|---|---|---|---|---|
| blood                           | for bacterial detection (broad-range and specific PCR and next-generation sequencing)                                      |                   |     |   |   |   |   |   |
| <b>Immunology substudy only</b> |                                                                                                                            |                   |     |   |   |   |   |   |
| Whole blood                     | <i>In vitro</i> binding to bacterial products, cytokine expression and cellular responses to PAMP stimulation <sup>4</sup> | TROPGAN, Zvitambo | All | X | X | X | X | X |
| Plasma                          | Co-culture with healthy immune cells <sup>5</sup>                                                                          | QMUL, London      | All | X | X | X | X | X |

<sup>1</sup>If HIV test, CD4 and viral load have already been conducted as part of routine clinical care, they will not be repeated on the research sample.

<sup>2</sup>THP1 reporter cells are derived from THP1, a human monocytic cell line that naturally expresses many pattern recognition receptors (PRR). The cell line stably expresses an NF- $\kappa$ B/AP-1 inducible reporter (SEAP) system to facilitate the monitoring of PRR-induced NF- $\kappa$ B/AP-1 activation.

<sup>3</sup>Assays will be undertaken in a subgroup of children, using a case-control or case-cohort design to evaluate the impact of biomarkers on immune activation and mortality.

<sup>4</sup>Whole blood will be stimulated with pathogen-associated molecular patterns (PAMP) in culture plates and bacterial antigens labelled with fluorescent tags in test tubes, and incubated for 1-24hr. Supernatant will be removed and stored at -80C for subsequent analysis of pro- and anti-inflammatory cytokines, and cells will be fixed for subsequent analysis of bacterial binding, cellular activation, proliferation and cytokine elaboration by flow cytometry.

<sup>5</sup>To determine the effect of the systemic milieu on healthy immune cell function, plasma samples will be transported to the Blizzard Institute, QMUL and co-cultured with healthy immune cells, which will be functionally analysed via multi-parameter flow cytometry in the Flow Cytometry Core Facility.

IFABP: Intestinal fatty acid binding protein; ELISA: Enzyme-linked immunosorbent assay; GLP-2: glucagon-like peptide 2; sCD14: soluble CD14; sCD163: soluble CD163; PAMP: pathogen-associated molecular pattern; QMUL: Queen Mary University of London; CRP: C-reactive protein; LAL: limulus amoebocyte lysate assay.

**Supplementary table 2: Additional laboratory analyses for enteropathy substudy**

| Sample type   | Assay (method)                                                                                                         | Location of work        | Study groups <sup>1</sup>         | Baseline | Discharge | Week 12 | Week 24 | Week 48 |
|---------------|------------------------------------------------------------------------------------------------------------------------|-------------------------|-----------------------------------|----------|-----------|---------|---------|---------|
| Urine         | Lactulose-mannitol ratio (mass spectrometry)                                                                           | Orgeon Analytics, USA   | A, B, C, D (all)                  | X        | X         | X       |         | X       |
| Stool         | Neopterin, myeloperoxidase, alpha-1 antitrypsin and REG-1B (ELISA)                                                     | TROPGAN and Zvitambo    | A, B, C, D (all)                  | X        | X         | X       | X       | X       |
| Plasma        | I-FABP (ELISA)                                                                                                         | TROPGAN and Zvitambo    | A, B, C, D (all)                  | X        | X         | X       | X       | X       |
| Plasma        | GLP-2                                                                                                                  | TROPGAN and Zvitambo    | A, B, C, D (all)                  | X        | X         | X       | X       | X       |
| Plasma        | Citrulline (mass spectrometry)                                                                                         | Imperial College London | A, B, C, D (all)                  | X        | X         | X       | X       | X       |
| Plasma        | Kynurenine:tryptophan ratio and metabolites along tryptophan pathway (mass spectrometry)                               | Imperial College London | A, B, C, D (all)                  | X        | X         | X       | X       | X       |
| Stool         | Microbiome analysis <sup>2</sup>                                                                                       | BCCDC, Vancouver        | A, B, C, D (all)                  | X        | X         | X       | X       | X       |
| Stool         | <i>Helicobacter pylori</i> antigen                                                                                     | TROPGAN and Zvitambo    | A, B, C, D (all)                  | X        |           |         |         |         |
| Gastric juice | Culture and molecular techniques for bacterial detection (broad-range and specific PCR and next-generation sequencing) | QMUL, London            | Subgroup of A, C (n=50 per group) | X        |           |         |         |         |

|                                  |                                               |                         |                  |   |   |   |   |   |
|----------------------------------|-----------------------------------------------|-------------------------|------------------|---|---|---|---|---|
| RNA extracted from PAXGene tubes | Gene expression analysis (RNASeq)             | QMUL, London            | A, B, C, D (all) | X | X |   |   |   |
| Plasma and urine                 | Targeted and untargeted metabolic phenotyping | Imperial College London | A, B, C, D (all) | X | X | X | X | X |

<sup>1</sup>Enteropathy substudy groups: Group A: HIV-positive children with severe acute malnutrition; Group B: HIV-positive well-nourished controls; Group C: HIV-negative children with severe acute malnutrition; Group D: HIV-negative well-nourished controls.

Note that controls only have blood taken at baseline.

<sup>2</sup>For microbiome analyses, total DNA and/or RNA will be extracted from stool samples and used as template for next generation sequencing library preparation and for quantitative polymerase chain reaction (qPCR), then sequenced via whole metagenome shotgun sequencing

QMUL: Queen Mary University of London; BCCDC: British Columbia Centre for Disease Control.

# BMJ Open

## Health Outcomes, Pathogenesis and Epidemiology of Severe Acute Malnutrition (HOPE-SAM): rationale and methods of a longitudinal observational study

|                               |                                                                                                                                                                                                                                                                                                                                                                                                                                                                                                                                                                                                                                                                                                                                                                                                                                                                                                                                                                                                                                                                                                                                                                                                                                                                                                                                                                                                                                                                                                                                                                                                                                                                                                                                                                                                                                                                                                                                                                                                                                                                                                                                                                           |
|-------------------------------|---------------------------------------------------------------------------------------------------------------------------------------------------------------------------------------------------------------------------------------------------------------------------------------------------------------------------------------------------------------------------------------------------------------------------------------------------------------------------------------------------------------------------------------------------------------------------------------------------------------------------------------------------------------------------------------------------------------------------------------------------------------------------------------------------------------------------------------------------------------------------------------------------------------------------------------------------------------------------------------------------------------------------------------------------------------------------------------------------------------------------------------------------------------------------------------------------------------------------------------------------------------------------------------------------------------------------------------------------------------------------------------------------------------------------------------------------------------------------------------------------------------------------------------------------------------------------------------------------------------------------------------------------------------------------------------------------------------------------------------------------------------------------------------------------------------------------------------------------------------------------------------------------------------------------------------------------------------------------------------------------------------------------------------------------------------------------------------------------------------------------------------------------------------------------|
| Journal:                      | <i>BMJ Open</i>                                                                                                                                                                                                                                                                                                                                                                                                                                                                                                                                                                                                                                                                                                                                                                                                                                                                                                                                                                                                                                                                                                                                                                                                                                                                                                                                                                                                                                                                                                                                                                                                                                                                                                                                                                                                                                                                                                                                                                                                                                                                                                                                                           |
| Manuscript ID                 | bmjopen-2018-023077.R2                                                                                                                                                                                                                                                                                                                                                                                                                                                                                                                                                                                                                                                                                                                                                                                                                                                                                                                                                                                                                                                                                                                                                                                                                                                                                                                                                                                                                                                                                                                                                                                                                                                                                                                                                                                                                                                                                                                                                                                                                                                                                                                                                    |
| Article Type:                 | Protocol                                                                                                                                                                                                                                                                                                                                                                                                                                                                                                                                                                                                                                                                                                                                                                                                                                                                                                                                                                                                                                                                                                                                                                                                                                                                                                                                                                                                                                                                                                                                                                                                                                                                                                                                                                                                                                                                                                                                                                                                                                                                                                                                                                  |
| Date Submitted by the Author: | 25-Oct-2018                                                                                                                                                                                                                                                                                                                                                                                                                                                                                                                                                                                                                                                                                                                                                                                                                                                                                                                                                                                                                                                                                                                                                                                                                                                                                                                                                                                                                                                                                                                                                                                                                                                                                                                                                                                                                                                                                                                                                                                                                                                                                                                                                               |
| Complete List of Authors:     | <p>Bwakura-Dangarembizi, Mutsa; University of Zimbabwe College of Health Sciences, Paediatrics and Child Health</p> <p>Amadi, Beatrice; 2Tropical Gastroenterology and Nutrition Group, University of Zambia, Lusaka, Zambia</p> <p>Bourke, Claire ; Blizard Institute, Queen Mary University of London, UK</p> <p>Robertson, Ruairi; Blizard Institute, Queen Mary University of London, UK</p> <p>Mwapenya, Benjamin; Zvitambo Institute for Maternal and Child Health Research, Harare, Zimbabwe</p> <p>Chandwe, Kanta; Tropical Gastroenterology and Nutrition Group, University of Zambia, Lusaka, Zambia</p> <p>Kapoma, Chanda; Tropical Gastroenterology and Nutrition Group, University of Zambia, Lusaka, Zambia, Paediatrics; Livingstone Central Hospital, Paediatrics</p> <p>Chifunda, Kapula; Tropical Gastroenterology and Nutrition Group, University of Zambia, Lusaka, Zambia, paediatrics and child health</p> <p>Majo, Florence; Zvitambo Institute for Maternal and Child Health Research, Harare, Zimbabwe</p> <p>Ngosa, Deophine; Tropical Gastroenterology and Nutrition Group, University of Zambia, Lusaka, Zambia</p> <p>Chakara, Pamela; Zvitambo Institute for Maternal and Child Health Research, Harare, Zimbabwe</p> <p>Chulu, Nivea; 2Tropical Gastroenterology and Nutrition Group, University of Zambia, Lusaka, Zambia</p> <p>Masimba, Faithfull; Zvitambo Institute for Maternal and Child Health Research, Harare, Zimbabwe</p> <p>Mapurisa, Idah; Zvitambo Institute for Maternal and Child Health Research, Harare, Zimbabwe</p> <p>Besa, Ellen; Zvitambo Institute for Maternal and Child Health Research, Harare, Zimbabwe</p> <p>Mutasa, Kuda; Zvitambo Institute for Maternal and Child Health Research, Harare, Zimbabwe</p> <p>Mwakamui, Simutanyi; 2Tropical Gastroenterology and Nutrition Group, University of Zambia, Lusaka, Zambia</p> <p>Runodamoto, Thompson ; Zvitambo Institute for Maternal and Child Health Research, Harare, Zimbabwe</p> <p>Humphrey, Jean; Zvitambo Institute for Maternal and Child Health Research, Harare, Zimbabwe</p> <p>Ntozini, Robert; Zvitambo Institute, Biostatistics &amp; IT</p> |

|                                   |                                                                                                                                                                                                                                                                                                                                                                                                           |
|-----------------------------------|-----------------------------------------------------------------------------------------------------------------------------------------------------------------------------------------------------------------------------------------------------------------------------------------------------------------------------------------------------------------------------------------------------------|
|                                   | Wells, Jonathan C. K.; UCL Great Ormond Street Institute of Child Health<br>Manges, Ameen; University of British Columbia<br>Swann, Jon; Imperial College London<br>Walker, Sarah; MRC Clinical Trials Unit at UCL<br>Nathoo, Kusum; University of Zimbabwe, College of Health Sciences<br>Kelly, Paul; Barts and The London School of Medicine<br>Prendergast, Andrew ; Queen Mary University of London, |
| <b>Primary Subject Heading:</b>   | Global health                                                                                                                                                                                                                                                                                                                                                                                             |
| <b>Secondary Subject Heading:</b> | Epidemiology, Nutrition and metabolism, Paediatrics, Immunology (including allergy)                                                                                                                                                                                                                                                                                                                       |
| <b>Keywords:</b>                  | Malnutrition, HIV, Africa, mortality, microbiota, enteropathy                                                                                                                                                                                                                                                                                                                                             |
|                                   |                                                                                                                                                                                                                                                                                                                                                                                                           |

SCHOLARONE™  
Manuscripts

1  
2  
3 **1 Health Outcomes, Pathogenesis and Epidemiology of Severe Acute Malnutrition**  
4  
5 **2 (HOPE-SAM): rationale and methods of a longitudinal observational study**  
6

7  
8  
9  
10 4 Mutsa Bwakura-Dangarembizi<sup>1</sup>, Beatrice Amadi<sup>2</sup>, Claire D Bourke<sup>3</sup>, Ruairi C Robertson<sup>3</sup>,  
11  
12 5 Benjamin Mwapenya<sup>4</sup>, Kanta Chandwe<sup>2</sup>, Chanda Kapoma<sup>2</sup>, Kapula Chifunda<sup>2</sup>, Florence  
13  
14 6 Majo<sup>4</sup>, Deophine Ngosa<sup>2</sup>, Pamela Chakara<sup>4</sup>, Nivea Chulu<sup>2</sup>, Faithfull Masimba<sup>4</sup>, Idah  
15  
16 7 Mapurisa<sup>4</sup>, Ellen Besa<sup>2</sup>, Kuda Mutasa<sup>4</sup>, Simutanyi Mwakamui<sup>2</sup>, Thompson Runodamoto<sup>4</sup>,  
17  
18 8 Jean H Humphrey<sup>4</sup>, Robert Ntozini<sup>4</sup>, Jonathan Wells<sup>5</sup>, Ameer R Manges<sup>6</sup>, Jonathan  
19  
20 9 Swann<sup>7</sup>, A Sarah Walker<sup>8</sup>, Kusum J Nathoo<sup>1</sup>, Paul Kelly<sup>2,3</sup>, Andrew J Prendergast<sup>3,4</sup> for  
21  
22 10 the HOPE-SAM Study Team<sup>9</sup>.  
23

24  
25  
26 12 <sup>1</sup>Department of Paediatrics and Child Health, University of Zimbabwe College of Health  
27  
28 13 Sciences, Harare, Zimbabwe

29  
30  
31 14 <sup>2</sup>Tropical Gastroenterology and Nutrition Group, University of Zambia, Lusaka, Zambia

32  
33 15 <sup>3</sup>Blizard Institute, Queen Mary University of London, UK

34  
35 16 <sup>4</sup>Zvitambo Institute for Maternal and Child Health Research, Harare, Zimbabwe

36  
37 17 <sup>5</sup>UCL Great Ormond Street Institute of Child Health, London, UK

38  
39 18 <sup>6</sup>University of British Columbia, Vancouver, Canada

40  
41 19 <sup>7</sup>Imperial College London, UK

42  
43 20 <sup>8</sup>MRC Clinical Trials Unit at UCL, London, UK

44  
45 21  
46  
47 22 <sup>9</sup>Other members of the HOPE-SAM study team are listed in the Acknowledgements  
48  
49 23 section.  
50

51  
52 24  
53  
54 25 **Corresponding author:** Dr Mutsa Bwakura-Dangarembizi, Senior Lecturer, Department  
55  
56 26 of Paediatrics and Child Health, University of Zimbabwe College of Health Sciences, Box  
57

1  
2  
3  
4  
5  
6  
7  
8  
9  
10  
11  
12  
13  
14  
15  
16  
17  
18  
19  
20  
21  
22  
23  
24  
25  
26  
27  
28  
29  
30  
31  
32  
33  
34  
35  
36  
37  
38  
39  
40  
41  
42  
43  
44  
45  
46  
47  
48  
49  
50  
51  
52  
53  
54  
55  
56  
57  
58  
59  
60

1 A178, Avondale, Harare, Zimbabwe. Email: [mbwakura@medsch.uz.ac.zw](mailto:mbwakura@medsch.uz.ac.zw). Tel +263 772  
2 601 735. Fax +263 4 700 877.

3  
4

5 Word count 5926

6 Abstract 261

7

8 Key words: Malnutrition, HIV, Africa, mortality, microbiota, enteropathy, immunology

9

10

For peer review only



## 1 **ABSTRACT**

### 2 **Introduction**

3 Mortality among children hospitalised for complicated severe acute malnutrition (SAM)  
4 remains high despite the implementation of WHO guidelines, particularly in settings of  
5 high HIV prevalence. Children continue to be at high risk of morbidity, mortality and  
6 relapse after discharge from hospital although long-term outcomes are not well  
7 documented. Better understanding the pathogenesis of SAM and the factors associated  
8 with poor outcomes may inform new therapeutic interventions.

### 10 **Methods and analysis**

11 The Health Outcomes, Pathogenesis and Epidemiology of Severe Acute Malnutrition  
12 (HOPE-SAM) study is a longitudinal observational cohort that aims to evaluate the short-  
13 and long-term clinical outcomes of HIV-positive and HIV-negative children with  
14 complicated SAM, and to identify the risk factors at admission and discharge from  
15 hospital that independently predict poor outcomes. Children aged 0-59mo hospitalised  
16 for SAM are being enrolled at three tertiary hospitals in Harare, Zimbabwe, and Lusaka,  
17 Zambia. Longitudinal mortality, morbidity and nutritional data are being collected at  
18 admission, discharge and for 48 weeks post-discharge. Nested laboratory substudies  
19 are exploring the role of enteropathy, gut microbiota, metabolomics and cellular immune  
20 function in the pathogenesis of SAM using stool, urine and blood collected from  
21 participants and from well-nourished controls.

### 23 **Ethics and dissemination**

24 The study is approved by the local and international institutional review boards in the  
25 participating countries (the Joint Research Ethics Committee of the University of  
26 Zimbabwe, Medical Research Council of Zimbabwe and University of Zambia Biomedical

1 Research Ethics Committee) and the study sponsor (Queen Mary University of London).  
2 Caregivers provide written informed consent for each participant. Findings will be  
3 disseminated through peer-reviewed journals, conference presentations and to  
4 caregivers at face-to-face meetings.

5

## 6 **Strengths and limitations of this study**

### 7 **Strengths:**

- 8 • Rigorous collection of longitudinal data on morbidity, mortality and nutritional  
9 status during inpatient care and for 48 weeks after initial admission for SAM in  
10 HIV-positive and HIV-negative children.
- 11 • Laboratory sub-studies investigating enteropathy, microbiota, metabolomics and  
12 immune cell function provide a unique opportunity to understand which  
13 pathogenic pathways contribute to SAM and whether these processes normalise  
14 with nutritional rehabilitation.

15

### 16 **Potential limitations:**

- 17 • High loss to follow-up due to participants returning to home settings following  
18 hospital discharge.
- 19 • The clinical heterogeneity of the study participants, including comorbidities such  
20 as infections, may make it challenging to identify the specific causes of clinical  
21 outcomes.
- 22 • Potential bias in recruiting well-nourished controls only from hospitals will be  
23 reduced by inclusion of community-based controls, including well-nourished  
24 siblings of children with SAM.

## 25 **INTRODUCTION**

1 Malnutrition underlies almost half of all childhood deaths in developing countries<sup>1</sup>.  
2 Severe acute malnutrition (SAM) is defined by a weight-for-height Z-score <-3, mid-  
3 upper arm circumference (MUAC) <115mm and/or bilateral pitting oedema<sup>2</sup>. Current  
4 treatment guidelines distinguish two groups: i) children with uncomplicated SAM who  
5 can be managed in the community; and ii) children with complicated SAM, who are  
6 hospitalised and undergo resuscitation, stabilisation and nutritional rehabilitation. In-  
7 hospital mortality in children with complicated SAM remains high despite the  
8 implementation of WHO guidelines<sup>3</sup>. Furthermore, SAM presents as two major clinical  
9 phenotypes: non-oedematous SAM (marasmus), characterised by severe wasting, and  
10 oedematous SAM (kwashiorkor), a more complex syndrome characterised by bilateral  
11 pitting oedema, steatosis and diarrhea<sup>4,5</sup>. Despite differing clinical outcomes, treatment  
12 protocols are the same for both oedematous and non-oedematous SAM.

13  
14 A contributory factor to high in-patient mortality is the co-occurrence of HIV infection in  
15 around one-third of children hospitalised for SAM in sub-Saharan Africa<sup>6,7</sup>. While new  
16 HIV infections in children have declined<sup>8</sup>, a substantial number of infected children are  
17 diagnosed late and present with malnutrition. There is also a growing population of HIV-  
18 exposed uninfected (HEU) children who have immune abnormalities, poor growth and  
19 higher risk of mortality and infectious morbidity<sup>9</sup>. Hence, HIV has transformed the  
20 epidemiology and outcomes of SAM<sup>10</sup>. Even with standardised treatment approaches,  
21 inpatient deaths are almost four-fold higher among HIV-positive children with SAM  
22 (herein termed HIV-SAM), compared to HIV-negative children with SAM (30.4% vs  
23 8.4%), for reasons that remain unclear<sup>10</sup>; this mortality is three-fold higher than would be  
24 expected from anthropometric parameters alone<sup>10</sup>. Management of HIV-SAM is  
25 particularly challenging because HIV fundamentally alters the clinical presentation of  
26 malnutrition and the response to treatment. Children with HIV-SAM are more stunted

1 and wasted; have a higher frequency of persistent diarrhoea; tend to have delayed  
2 nutritional recovery and have a more complicated clinical course than HIV-negative  
3 children with SAM<sup>10</sup>.

#### 5 **Long-term outcomes of SAM**

6 Following resolution of complications and return of appetite, children are discharged  
7 from hospital to continue therapeutic feeds at home. However, emerging data indicate  
8 high post-discharge mortality following in-hospital management of SAM<sup>11-13</sup>. Malnutrition  
9 together with young age, HIV infection and pneumonia have been associated with higher  
10 post-discharge mortality<sup>14</sup>. One of the largest prospective studies of growth and mortality  
11 in children with SAM (FuSAM), conducted in Malawi from July 2006 to March 2007,  
12 collected 12-month outcome data on 87% of 1024 children admitted to the nutrition  
13 ward<sup>11</sup>. A total of 427 (42%) died and 44% of these deaths occurred after discharge from  
14 hospital. Survival was greatest among those who were nutritionally cured upon  
15 discharge from outpatient therapeutic feeding centres, defined as two consecutive visits  
16 with >80% expected weight-for-height, no oedema and clinically stable. The risk of  
17 mortality after hospital discharge was four-fold higher for HIV-SAM compared to HIV-  
18 negative children with SAM, but the outcomes among HEU children were not reported.  
19 The loss to follow-up was high in the FuSAM study because there was only one follow-  
20 up visit, one year after discharge from outpatient-feeding centres. A recent study from  
21 Kenya identified malnutrition and HIV infection as key drivers for post-discharge  
22 mortality, with 52% of deaths attributable to MUAC <11.5cm and 11% to HIV infection<sup>15</sup>.

23

24 The impact of SAM appears to persist beyond the first year after discharge from hospital.  
25 The ChroSAM study, which followed children with SAM seven years post-discharge,  
26 showed that children had poorer growth, body composition and physical function

1 compared to siblings and community controls, which are all indicators of future  
2 cardiovascular and metabolic disease<sup>12</sup>.

3  
4 While anthropometry is used to assess nutritional recovery after discharge from hospital,  
5 the pattern and quality of growth recovery following SAM is poorly understood. The  
6 observation that children treated for SAM have a deficit in lean tissue despite regaining  
7 weight suggests that assessing body composition in addition to anthropometry may help  
8 to identify children who have not completely recovered and are at potential risk of long-  
9 term metabolic diseases<sup>12</sup>. Children with HIV-SAM appear to have potential for catch-up  
10 growth in weight-for-age and/or weight-for-height, which have been shown to normalise  
11 with treatment even prior to widespread availability of ART<sup>16</sup>; by contrast, height-for-age  
12 shows less potential for catch-up growth<sup>17</sup>. However, the body composition of children  
13 with HIV-SAM compared to HIV-negative children with SAM has not been described.  
14 Whether children recover fat mass at the expense of lean mass is unknown, but  
15 differences in tissue accretion patterns may have implications for survival and long-term  
16 metabolic health<sup>18 19</sup>. There is also a need to consider the effect of SAM on the size of  
17 body parts which grow at different rates: relatively shorter legs, for example, are  
18 associated with epidemiologic risk of overweight, coronary artery disease, liver  
19 dysfunction and diabetes<sup>20 21</sup>.

20  
21 Taken together, there is clearly an elevated risk of mortality among HIV-positive children  
22 with SAM compared to HIV-negative children with SAM, and an ongoing mortality risk  
23 among all children with SAM that persists after discharge from hospital. There are  
24 several gaps in our understanding of the long-term outcomes: (i) causes of death have  
25 not been clearly defined; (ii) no studies have systematically and longitudinally collected  
26 morbidity and mortality data or documented repeat hospitalisations post-discharge; and,

1 (iii) the long-term outcomes of HIV-positive children with SAM in the era of ART  
2 availability are unclear.

#### 4 **Pathogenesis of SAM**

5 Better understanding the pathogenesis of SAM may help to explain the high mortality of  
6 children both during and after hospitalisation and identify new targets for interventions to  
7 supplement existing treatment strategies. Consistent evidence that immune mediators  
8 are altered in malnutrition<sup>22</sup> and that systemic and intestinal inflammation are associated  
9 with poor outcomes in SAM<sup>23</sup>, suggest that immune dysfunction contributes to infectious  
10 susceptibility<sup>24</sup>. Malnutrition is also characterised by a complex derangement in gut  
11 microbial<sup>25</sup> metabolic,<sup>26</sup> immune<sup>27</sup> and hormonal pathways, organ dysfunction and  
12 micronutrient deficiencies in the context of co-infections, enteropathy and chronic  
13 inflammation. Several studies have recently provided insights into these perturbations  
14 using new tools<sup>25 26 28 29</sup>, including metabolomics and metagenomics, but we still lack a  
15 clear understanding of many of the pathogenic pathways driving malnutrition, the  
16 interactions between these pathways, and which are the most tractable targets for  
17 intervention.

18  
19 SAM shares several pathological and clinical features with HIV, which may explain  
20 clinical outcomes in these co-occurring conditions: 1) both are characterised by intestinal  
21 damage, leading to impairment of the mucosal barrier and increased intestinal  
22 permeability; 2) both have underlying systemic immune activation; and 3) both are  
23 frequently complicated by persistent diarrhoea, pneumonia and sepsis that may  
24 plausibly arise due to loss of intestinal barrier function<sup>30</sup>. Understanding the overlapping  
25 impact of HIV and SAM is critical to inform additional interventions to improve outcomes  
26 of children with HIV-SAM.

1  
2  
3 14  
5 2 **OBJECTIVES OF HOPE-SAM**6  
7 3 The Health Outcomes, Pathogenesis and Epidemiology of Severe Acute Malnutrition8  
9 4 (HOPE-SAM) study has two primary objectives:

- 10
- 
- 11 5 1) To describe the short- and long-term clinical outcomes of children with
- 
- 12 6 complicated SAM, with and without HIV infection, and to identify the risk factors
- 
- 13 7 at admission and discharge from hospital that independently predict these
- 
- 14 8 outcomes.
- 
- 15 9 2) To better characterise the pathogenesis of SAM through nested laboratory sub-
- 
- 16 10 studies evaluating enteropathy, gut microbiota, metabolomics and immune cell
- 
- 17 11 function.

12  
13 13 **STUDY DESIGN**14 14 HOPE-SAM is a longitudinal observational cohort study, enrolling between 600-800  
15 15 children aged 0-59 months admitted with complicated SAM to the tertiary pediatric wards  
16 16 at two sites in Zimbabwe (Parirenyatwa Hospital and Harare Children's Hospital) and  
17 17 one in Zambia (University Teaching Hospital, Lusaka). Both HIV-positive and HIV-  
18 18 negative children will be enrolled. Throughout this paper, 'SAM' refers to all children,  
19 19 regardless of HIV status; where analyses specifically compare children by HIV status,  
20 20 groups are identified as HIV-positive children with SAM (or HIV-SAM) and HIV-negative  
21 21 children with SAM. All participants with SAM are followed for 48 weeks post-discharge,  
22 22 with longitudinal data collection and blood sampling. The study contains four nested sub-  
23 23 studies as shown in **Figure 1**. A subgroup of children will be recruited to the  
24 24 enteropathy substudy for which they will have the same follow-up procedures but more  
25 25 intensive biological specimen collection including stool (all time-points), urine after  
26 26 lactulose-mannitol (LM) challenge as an assessment of intestinal permeability, and

1 nasogastric aspirate (baseline only); these children are also included in microbiota and  
2 metabolomics substudies. Children with SAM for whom blood samples are available are  
3 included in the immunology substudy, for which circulating inflammatory mediators will  
4 be assayed; functional cellular immunology assays will be conducted for all children in  
5 the immunology sub-study with sufficient sample volume (> 2mL) recruited after June  
6 2017. A group of healthy children recruited from the same hospitals and communities,  
7 who are well-nourished and matched to children in the enteropathy substudy by age and  
8 HIV status, will have data and specimens collected to provide normative data for the  
9 laboratory substudies; these well-nourished controls will not be followed longitudinally.

10  
11 The study protocol, data collection forms and standard operating procedures are  
12 available online at [osf.io/29uaw](http://osf.io/29uaw).

## 13 14 **RECRUITMENT**

15 *Screening:* Caregivers of all hospitalised children are sensitised about the study. All new  
16 admissions aged 0-59 months are screened for SAM, which is defined according to  
17 WHO criteria as any of: weight-for-height Z-score (WHZ) <-3, MUAC <115 mm (if aged  
18 6-59mo) and/or bilateral pitting oedema. All children with SAM are recruited from  
19 hospital and this study therefore focuses on complicated SAM; children with  
20 uncomplicated SAM will not be enrolled.

21  
22 *Eligibility for observational cohort:* All children with SAM whose caregivers are willing to  
23 provide written informed consent and to learn their child's HIV status are offered  
24 enrolment. Any children who die prior to study enrolment and those with a known  
25 malignancy are ineligible.



1 *Eligibility for enteropathy substudy:* Children with SAM aged 6-59 months with a  
 2 nasogastric tube in place (or due to be placed) are categorized into 4 groups (HIV-  
 3 positive oedematous (Group A-I); HIV-positive non-oedematous (Group A-II); HIV-  
 4 negative oedematous (Group C-I) and HIV-negative non-oedematous (Group C-II), as  
 5 shown in Table 1. Children meeting eligibility criteria will be enrolled throughout the  
 6 study recruitment period until sufficient specimens have been collected from the groups  
 7 shown in Table 1. Children in the enteropathy substudy are stratified into age bands (6-  
 8 11 months; 12-23 months and 24-59 months) to enable age-matching of well-nourished  
 9 controls. Children with underlying chronic gastrointestinal disease or a known  
 10 malignancy are ineligible.

11  
 12 **Table 1: Enteropathy substudy groups**

| Children aged 6-59 months                                           | Severe acute malnutrition <sup>1</sup> |                      | Well nourished controls<br>WHZ>-1 |
|---------------------------------------------------------------------|----------------------------------------|----------------------|-----------------------------------|
|                                                                     | Oedematous <sup>2</sup>                | Non-oedematous       |                                   |
| <b>HIV-positive</b><br>(HIV PCR+ if <18mo; HIV antibody + if >18mo) | N=50<br>(Group A-I)                    | N=50<br>(Group A-II) | N=100 <sup>3</sup><br>(Group B)   |
| <b>HIV-negative</b><br>(HIV PCR- if <18mo; HIV antibody - if >18mo) | N=50<br>(Group C-I)                    | N=50<br>(Group C-II) | N=100 <sup>4</sup><br>(Group D)   |

13  
 14 <sup>1</sup>SAM defined according to WHO criteria

15 <sup>2</sup>Presence of bilateral pitting pedal oedema.

16 Note that children below 6 months of age are excluded from the enteropathy substudy to avoid interrupting  
 17 exclusive breastfeeding during the lactulose-mannitol test.

18 WHZ: Weight-for-height Z score; PCR: polymerase chain reaction.

19  
 20  
 21 *Eligibility for microbiota and metabolomics substudies:* Children enrolled into the  
 22 enteropathy substudy are also included in the microbiota and metabolomics substudies,  
 23 since these substudies utilize the stool, urine and plasma samples collected for  
 24 enteropathy analyses.

1  
2  
3 1  
4

5 2 *Eligibility for immunology substudy:* The immunology substudy comprises all children  
6  
7 3 with SAM (drawn from both the observational cohort and the enteropathy substudy, as  
8  
9 4 shown in Figure 1) providing a blood sample of sufficient volume (>2ml) for cellular  
10  
11 5 assays after 1<sup>st</sup> June 2017.  
12  
13

14 6

15  
16 7 *Well-nourished controls:* Controls are children drawn from the same hospitals and  
17  
18 8 communities as cases with SAM (including well-nourished sibling controls), who are  
19  
20 9 aged 6-59 months (matched to enteropathy substudy children within age bands), well-  
21  
22 10 nourished (weight-for-height Z-score >-1) and clinically well (no acute illness or current  
23  
24 11 infections) with known HIV status. Controls are categorized into two groups: well-  
25  
26 12 nourished HIV-positive (Group B) and well-nourished HIV-negative (Group D), as shown  
27  
28 13 in Table 1. Children with underlying chronic gastrointestinal disease or a known  
29  
30 14 malignancy are ineligible. Well-nourished controls provide comparison biomarker data  
31  
32 15 for all the laboratory substudies.  
33  
34

35 16

36  
37 17 *Informed consent procedures:* Written informed consent is obtained from the primary  
38  
39 18 caregiver using consent forms translated into local languages; where possible, other family  
40  
41 19 members are included in the consent process. Illiterate caregivers who have understood a  
42  
43 20 verbal explanation of the study can provide a thumb imprint in the presence of a witness.  
44  
45 21 Assent from children is not sought because all are <5 years old.  
46

47 22

## 48 23 **STUDY PROCEDURES**

49  
50  
51 24 Study procedures are outlined in **Table 2**.

### 52 25 **Table 2: Summary of procedures in observational cohort**

53  
54  
55 26  
56  
57  
58  
59  
60

| Assessment                                                           | Hospitalization              |                        | Post-discharge <sup>3</sup>                 |    |     |     |     |
|----------------------------------------------------------------------|------------------------------|------------------------|---------------------------------------------|----|-----|-----|-----|
|                                                                      | Baseline <sup>1</sup>        | Discharge <sup>2</sup> | 2w                                          | 4w | 12w | 24w | 48w |
| Caregiver informed consent to join observational cohort              | x                            |                        |                                             |    |     |     |     |
| Summary checklist                                                    | x                            |                        |                                             |    |     |     |     |
| Locator information <sup>4</sup>                                     | x                            |                        |                                             |    |     |     |     |
| Acute admission information                                          | x                            |                        |                                             |    |     |     |     |
| Baseline data                                                        | x                            |                        |                                             |    |     |     |     |
| Daily clinical review <sup>5</sup>                                   | Daily during hospitalisation |                        |                                             |    |     |     |     |
| Blood collection <sup>6</sup>                                        | x                            | x                      |                                             |    | x   | x   | x   |
| HIV testing <sup>7</sup>                                             | x                            |                        |                                             |    |     |     |     |
| CD4 count and viral load (HIV-infected children only)                | x                            |                        |                                             |    | x   | x   | x   |
| Full blood count <sup>8</sup>                                        | x                            | x                      |                                             |    | x   | x   | x   |
| Anthropometry                                                        | x                            | x                      | x                                           | x  | x   | x   | x   |
| Skinfold thickness <sup>9</sup>                                      |                              | x                      | x                                           | x  | x   | x   | x   |
| Body composition <sup>10</sup>                                       | x                            | x                      | x                                           | x  | x   | x   | x   |
| Discharge data collection                                            |                              | x                      |                                             |    |     |     |     |
| Daily morbidity diary                                                |                              |                        | Daily during follow-up period by caregivers |    |     |     |     |
| Follow-up clinic: history, examination, morbidity and mortality data |                              |                        | x                                           | x  | x   | x   | x   |

1

<sup>1</sup>Children will be enrolled as soon as possible after hospitalisation and will undergo baseline investigations as soon as possible after enrolment. This is to provide a window of opportunity to time collection of research specimens with clinical specimens, and to ensure that the child is clinically stable before undertaking research investigations.

<sup>2</sup>The discharge procedures will be undertaken on the day of discharge, or as close as possible to that date.

<sup>3</sup>Windows will be created around these post-discharge time-points to maximize follow-up for caregivers who miss visits or are unavailable, as follows: 2 weeks (1-3 weeks); 4 weeks (3-5 weeks); 12 weeks (10-14 weeks); 24 weeks (20-28 weeks); 48 weeks (44-52 weeks).

<sup>4</sup>Locator information will updated at subsequent visits if caregivers have moved or changed contact details.

<sup>5</sup>A clinical review will be undertaken every day between admission and discharge by the study clinician.

<sup>6</sup>5.4 mL of blood (depending on child weight; amount will not exceed 2 mL/kg total over 2 week period) will be collected by a study nurse into endotoxin-free EDTA tubes. Samples will be used to store whole blood, PBMC and plasma for subsequent measurement of CRP and albumin. Where blood sample volumes allow ( $\geq 2$ mL sample), bacterial binding assays and whole blood stimulations will be conducted and culture supernatants and cells stored for subsequent assessment of immune cell function at each time-point.

1  
2  
3 1 Study blood samples will not be collected from children with known haemoglobin <6 g/dL.  
4 2 <sup>7</sup>HIV testing is conducted as part of routine clinical practice, but if it has not been undertaken, the study  
5 3 sample will be used to test for HIV, as stated in the informed consent form, since HIV status is required  
6 4 to allocate children to study groups.  
7 5 <sup>8</sup>Full blood count results will be transcribed from clinical records; if not done by clinical teams, the EDTA  
8 6 sample will be used to measure FBC in clinical laboratories at each site  
9 7 <sup>9</sup>Skinfold thickness (triceps, subscapular, supra-iliac) and mid-thigh circumference will be measured  
10 8 using Holtain calipers or tape measure.  
11 9 <sup>10</sup>Body composition will be assessed by bioimpedance vector analysis.

12 10  
13 11  
14 12  
15 13 *Baseline procedures:*

16 14 Baseline data on maternal and household characteristics, the child's past medical history  
17 15 and current illness are collected by a study nurse. Anthropometry, including body  
18 16 composition measured by whole-body (wrist-ankle) bio-electrical impedance analysis  
19 17 (BodyStat 1500MD; BodyStat Ltd., Douglas, Isle of Man), leg length using an electronic  
20 18 knemometer (Zimbabwe only, due to availability of knemometers) and triceps,  
21 19 subscapular and supra-iliac skinfold thickness using calipers (Holtain Ltd., Crymych, UK)  
22 20 are undertaken at baseline. Blood (1mL/kg up to 5.4mL maximum) is collected at  
23 21 baseline into an endotoxin-free EDTA tube for all children and, in the enteropathy  
24 22 substudy, additionally into a PAXgene tube (PreAnalytiX GmbH, Hombrechtikon,  
25 23 Switzerland) for subsequent transcriptomic analysis. Blood is not collected from children  
26 24 with severe anaemia (known haemoglobin <6 g/dL). HIV testing is carried out in  
27 25 accordance with national guidelines as part of routine clinical practice; where it has not  
28 26 been done, the child's HIV status is ascertained using a rapid test antibody algorithm for  
29 27 children over 18 months, or HIV DNA PCR for children under 18 months. CD4  
30 28 count/percentage and viral load are measured in HIV-positive children. Maternal HIV  
31 29 status is documented where available, so that HIV-exposed uninfected children can be  
32 30 identified. Blood samples are sent to research laboratories at each site to conduct whole  
33 31 blood stimulation and bacterial binding assays (as described in the immunology  
34 32 substudy) and to store aliquots of whole blood, peripheral blood cells and plasma at -

1 80°C<sup>31</sup>. In the enteropathy substudy, nasogastric aspirate, stool and urine (after an oral  
2 dose of lactulose and mannitol) are also collected. Lactulose and mannitol are ingested  
3 by the child after fasting and urine is collected over a two-hour period to measure  
4 recovery of lactulose and mannitol, a measure of intestinal absorptive capacity and  
5 permeability, as previously described<sup>32</sup>.

6  
7 *Daily procedures:* Routine inpatient management is undertaken by ward clinical teams  
8 according to local hospital protocols, which are based on WHO guidelines<sup>2,33</sup>. In addition,  
9 the HOPE-SAM study clinician at each hospital site collects daily data until discharge on  
10 clinical parameters (including daily examination), resolution of acute infections,  
11 nutritional recovery (loss of oedema, restoration of appetite, weight gain), and  
12 treatment/nutritional supplements received; this will allow us to evaluate differences in  
13 management between countries. Children with HIV-SAM who are ART-naïve start ART  
14 according to national guidelines, which are based on WHO recommendations<sup>2,34</sup>.

15  
16 *Discharge:* The clinical team decides when the child is ready to be discharged, which is  
17 generally when their medical complications are resolving and the child has a good  
18 appetite and is clinically well and alert<sup>2</sup>. Children receive ready-to-use therapeutic feeds  
19 (RUTF) to take at home according to local guidelines. At discharge, the study nurse  
20 collects data and a repeat blood sample (including full blood count) and undertakes  
21 discharge anthropometry, body composition, leg length (Zimbabwe only) and triceps,  
22 subscapular and supra-iliac skinfold thickness measurements (**Table 2**). The caregiver is  
23 given a daily morbidity diary and pre-prepared stickers corresponding to different  
24 illnesses and shown how to complete the diary. The caregiver is provided with the date  
25 of the first follow-up appointment and contact details of the study nurse.

1

2 *Follow-up:* Children attend follow-up appointments at dedicated study clinics at 2, 4, 12,  
 3 24 and 48 weeks post-discharge. At each visit, the study physician undertakes a clinical  
 4 assessment and the study nurse captures illness, medication and feeding data. Clinic  
 5 data are transcribed from handheld medical records if available and the morbidity diary  
 6 is reviewed and a new diary and stickers supplied. Anthropometry, body composition,  
 7 leg length (Zimbabwe only) and triceps, subscapular and supra-iliac skinfold thicknesses  
 8 are measured at each visit. Acute illnesses are treated in the study clinic, or the child is  
 9 referred to hospital if necessary. Children with relapsed malnutrition are provided with  
 10 nutritional supplements or RUTF according to local guidelines, or readmitted to hospital  
 11 if they develop complicated SAM. Transport reimbursement for clinic attendance is  
 12 provided to caregivers for each visit.

13

14 Blood is collected at weeks 12, 24 and 48 post-discharge into endotoxin-free EDTA  
 15 tubes to measure full blood count, CD4 count and viral load (HIV-positive children only),  
 16 conduct whole blood stimulation and bacterial binding assays (where blood volumes  
 17 >2mL), and store peripheral blood cells and plasma aliquots for subsequent analysis (all  
 18 blood samples), including soluble and cellular markers of immune activation, as outlined  
 19 in **Supplementary Table 1**. Children in the enteropathy substudy have additional stool  
 20 and urine collection following lactulose-mannitol dosing as shown in **Table 3**.

21

22 **Table 3: Summary of procedures for cases in the enteropathy substudy**

23

| Assessment                                                                       | Hospitalization       |                        | Post-discharge <sup>3</sup> |    |     |     |     |
|----------------------------------------------------------------------------------|-----------------------|------------------------|-----------------------------|----|-----|-----|-----|
|                                                                                  | Baseline <sup>1</sup> | Discharge <sup>2</sup> | 2w                          | 4w | 12w | 24w | 48w |
| Caregiver informed consent to join observational cohort and enteropathy substudy | X                     |                        |                             |    |     |     |     |

|                                                                      |                              |   |                                             |   |   |   |   |   |
|----------------------------------------------------------------------|------------------------------|---|---------------------------------------------|---|---|---|---|---|
|                                                                      |                              |   |                                             |   |   |   |   |   |
| Summary checklist                                                    | X                            |   |                                             |   |   |   |   |   |
| Locator information <sup>4</sup>                                     | X                            |   |                                             |   |   |   |   |   |
| Acute admission information                                          | x                            |   |                                             |   |   |   |   |   |
| Baseline data                                                        | X                            |   |                                             |   |   |   |   |   |
| Daily clinical review <sup>5</sup>                                   | Daily during hospitalisation |   |                                             |   |   |   |   |   |
| Blood collection <sup>6</sup>                                        | x                            | x |                                             |   | x | x | x |   |
| HIV testing <sup>7</sup>                                             | X                            |   |                                             |   |   |   |   |   |
| CD4 count and viral load (HIV-infected children only)                | X                            |   |                                             |   | x | x | x |   |
| Full blood count <sup>8</sup>                                        | X                            | x |                                             |   | x | x | x |   |
| Gastric aspirate <sup>9</sup>                                        | x                            |   |                                             |   |   |   |   |   |
| Stool collection <sup>10</sup>                                       | x                            | x |                                             |   | x | x | x |   |
| Lactulose-mannitol testing <sup>11</sup>                             | x                            | x |                                             |   | x |   |   | x |
| Anthropometry                                                        | X                            | x | x                                           | x | x | x | x | x |
| Skinfold thickness <sup>12</sup>                                     |                              | x | x                                           | x | x | x | x | x |
| Body composition <sup>13</sup>                                       | X                            | x | x                                           | x | x | x | x | x |
| Discharge data collection                                            |                              | x |                                             |   |   |   |   |   |
| Daily morbidity diary                                                |                              |   | Daily during follow-up period by caregivers |   |   |   |   |   |
| Follow-up clinic: history, examination, morbidity and mortality data |                              |   | x                                           | x | x | x | x |   |

1

2

3

<sup>1</sup>Children will be enrolled within 24h of hospitalization and will undergo baseline investigations within 72h of hospitalization. This is to provide a window of opportunity to time collection of research specimens with clinical specimens, and to ensure that the child is clinically stable before undertaking research investigations.

4

5

6

7

<sup>2</sup>The discharge procedures will be undertaken on the day of discharge, or as close as possible to that date.

8

9

<sup>3</sup>Windows will be created around these post-discharge time-points to maximize follow-up for caregivers who miss visits or are unavailable, as follows: 2 weeks (1-3 weeks); 4 weeks (3-5 weeks); 12 weeks (10-14 weeks); 24 weeks (20-28 weeks); 48 weeks (44-52 weeks).

10

11

12

<sup>4</sup>Locator information will updated at subsequent visits if caregivers have moved or changed contact details.

13

14

<sup>5</sup>Daily clinical review will be conducted every day between admission and discharge by the study clinician.

15

16

<sup>6</sup>During hospitalisation, 5.4 mL of blood (depending on child weight; amount will not exceed 2 mL/kg total over 2 week period) will be collected by a study nurse into a 2.7 mL endotoxin-free EDTA tube and

17

1  
2  
3 1 a 2.7 mL PAXGene tube, for subsequent isolation of RNA and gene expression analysis. After  
4 2 discharge (weeks 12, 24 and 48), 5.4 mL of blood (depending on child weight; amount will not exceed 2  
5 3 mL/kg total over 2 week period) will be collected by a study nurse into two 2.7 mL endotoxin-free EDTA  
6 4 tubes.

7 5 <sup>7</sup>HIV testing is conducted as part of routine clinical practice, but if it has not been undertaken, the study  
8 6 sample will be used to test for HIV (see section 9.4), as stated in the informed consent form, since HIV  
9 7 status is required to allocate children to study groups.

10 8 <sup>8</sup>Full blood count results will be transcribed from clinical records; if not done by clinical teams, the EDTA  
11 9 sample will be used to measure FBC in clinical laboratories at each site

12 10 <sup>9</sup>A gastric juice sample will be collected at the same time as the blood draw by aspirating the  
13 11 nasogastric tube with a sterile feeding syringe, to test for gastric pH; sterile water or saline will then be  
14 12 instilled and a sample of gastric juice collected for storage for subsequent PCR and culture (section  
15 13 7.5.2)

16 14 <sup>10</sup>Stool collection will be undertaken at the same time as the blood draw

17 15 <sup>11</sup>Lactulose-mannitol testing will be conducted, with collection of a baseline urine sample, followed by a  
18 16 2hr urine collection post-LM ingestion. This test will be deferred until children are judged to be clinically  
19 17 stable by the study physician during daily reviews. In general, this will be a child in the nutritional  
20 18 rehabilitation phase, who has no cardiorespiratory compromise.

21 19 <sup>12</sup>Skinfold thickness (triceps, subscapular, supra-iliac) and mid-thigh circumference will be measured  
22 20 using Holtain calipers or tape measure.

23 21 <sup>13</sup>Body composition will be assessed by bioimpedance vector analysis.  
24 22  
25 23  
26 24

25 25 Caregivers are reminded of follow-up visits by phone, and visit completion is tracked on  
26 26 a dedicated database. If caregivers do not attend follow-up appointments, attempts are  
27 27 made to contact them by phone and home visits are made if feasible, particularly for  
28 28 those defaulting the 48-week visit, so that long-term outcome data can be collected. For  
29 29 post-discharge deaths, a home visit is undertaken by study nurses where possible to  
30 30 conduct a verbal autopsy. Children who are readmitted to one of the study sites with  
31 31 relapsed SAM have data collected during the new episode of hospitalisation. The study  
32 32 ends for each participant at the week 48 visit.  
33 33  
34 34

## 34 34 **SUBSTUDIES**

35 35 As outlined in Figure 1, four nested substudies will utilise biological specimens to  
36 36 address mechanistic questions related to enteropathy, microbiota, metabolomics and  
37 37 immune function.  
38 38

### 39 39 *Enteropathy substudy*



1  
2  
3 1 The gut, which acts as an internal interface between humans and the environment, must  
4  
5 2 contain the nutrient stream and the symbiotic microbiota while allowing molecular  
6  
7 3 intimacy to permit absorption. The mechanism underlying this duality is the integrity of  
8  
9 4 the gastrointestinal barrier; intestinal damage (enteropathy) can impair this critical barrier  
10  
11 5 function. A spectrum of enteropathies affect children in developing countries<sup>30</sup>.  
12  
13 6 Environmental enteric dysfunction (EED), characterised by small intestinal inflammation,  
14  
15 7 blunted villi and increased intestinal permeability, is almost universal and is  
16  
17 8 morphologically indistinguishable from HIV enteropathy<sup>30</sup>. Children in resource-poor  
18  
19 9 settings also suffer from frequent diarrhoea, food insecurity and micronutrient  
20  
21 10 deficiencies, which all exacerbate enteropathy<sup>30</sup>. As a result, a cycle of intestinal  
22  
23 11 infection, impaired mucosal function and malnutrition commonly arises, which may  
24  
25 12 ultimately precipitate SAM, especially in the context of HIV infection<sup>35 36</sup>. It is not yet  
26  
27 13 established if the enteropathy seen in children with SAM<sup>37</sup>, which we here refer to as  
28  
29 14 malnutrition enteropathy<sup>37</sup>, is qualitatively or quantitatively distinguishable from EED. In  
30  
31 15 addition to local intestinal pathology, enteropathies may cause systemic pathology due  
32  
33 16 to persistent immune activation arising from enteric inflammation and microbial  
34  
35 17 translocation across the damaged gut wall<sup>30</sup>. It is becoming apparent that chronic  
36  
37 18 inflammation may be particularly deleterious in malnourished individuals<sup>23</sup>; in children  
38  
39 19 with SAM, systemic inflammation arising from underlying enteropathy may further  
40  
41 20 increase morbidity and mortality.  
42  
43  
44  
45  
46  
47  
48  
49  
50  
51  
52  
53  
54  
55  
56  
57  
58  
59  
60

22 We hypothesize that i) the degree of enteropathy during hospitalisation differs between  
23 oedematous and non-oedematous SAM and is independently associated with morbidity,  
24 mortality and nutritional recovery during hospitalization; ii) the degree of enteropathy at  
25 discharge is independently associated with morbidity, mortality and relapse of SAM; and

1  
2  
3 1 iii) children with HIV-SAM have more severe enteropathy than HIV-negative children with  
4  
5 2 SAM, which contributes to their poorer outcomes.  
6

7 3  
8  
9 4 Using stored samples, a longitudinal series of investigations will compare gastric and  
10  
11 5 small intestinal barrier function, using a range of biomarkers to capture the domains of  
12  
13 6 malnutrition enteropathy (**Supplementary Table 2**). To understand better the extra-  
14  
15 7 intestinal consequences of enteropathy, we will first compare the microbial composition  
16  
17 8 of the upper gut and plasma using deep sequencing in a subgroup of children with  
18  
19 9 paired gastric and blood samples. Secondly, we will undertake transcriptomics using  
20  
21 10 PAXGene blood samples to determine i) whether there are differences in gene  
22  
23 11 expression profiles between well-nourished controls, HIV-negative children with SAM  
24  
25 12 and HIV-positive children with SAM (including comparison of oedematous and non-  
26  
27 13 oedematous types); and ii) whether specific patterns of gene expression are associated  
28  
29 14 with morbidity and mortality in SAM.  
30  
31  
32  
33  
34

### 35 16 *Microbiota substudy*

36  
37 17 Normal assembly of the gut microbiota in early life is critical for many aspects of  
38  
39 18 physiological, neurological and immune development<sup>38</sup>. Recent evidence suggests that  
40  
41 19 an immature or pathogenic microbiota plays a causative role in the pathogenesis of  
42  
43 20 SAM<sup>25</sup>. For example, a number of microbial taxa have been identified, including  
44  
45 21 *Faecalibacterium prausnitzii*, which discriminate and predict gut microbiota maturity and  
46  
47 22 child growth<sup>28</sup>. Other pathogenic microorganisms, including IgA-targeted  
48  
49 23 *Enterobacteriaceae*, are associated with impaired growth and may contribute to SAM<sup>39</sup>.  
50  
51 24 Nutritional rehabilitation with RUTF induces temporary recovery of a disturbed  
52  
53 25 microbiota; however, the microbiota appears to revert back to an immature diseased  
54  
55 26 state following nutritional recovery<sup>29</sup>. HIV infection is also associated with a disturbed gut  
56  
57  
58  
59  
60

1 microbiota<sup>40</sup>, which may further compound enteropathy phenotypes. Furthermore, there  
2 is some evidence that differences exist in malnutrition enteropathy between oedematous  
3 and non-oedematous SAM<sup>41</sup>; however, few studies have investigated differences in the  
4 gut microbiota between the two forms of the disease.

5  
6 We hypothesize that (i) a unique gut microbial signature exists in HIV-SAM, compared  
7 with HIV-negative children with SAM, that is independently associated with morbidity,  
8 mortality, nutritional recovery and degree of enteropathy during hospitalisation; (ii) a  
9 unique gut microbial signature exists in oedematous compared with non-oedematous  
10 SAM; (iii) specific microorganisms or gut microbial diversity indices are independently  
11 associated with morbidity, mortality, nutritional recovery and degree of enteropathy  
12 during hospitalisation; and (iv) the gut microbiota is partially restored to a healthy state  
13 with nutritional rehabilitation but reverts to a dysbiotic state during follow-up, which  
14 predicts morbidity, mortality and relapse of SAM.

15  
16 Using stored stool samples collected at baseline, a cross-sectional investigation will  
17 determine differences in the gut microbial composition and predicted function between:  
18 HIV-negative children with SAM versus HIV-SAM, oedematous versus non-oedematous  
19 SAM, and well-nourished controls. Gut microbial composition and predicted function will  
20 be compared between groups at discharge and at 12, 24 and 48 weeks post-discharge.  
21 Briefly, total DNA and/or RNA will be extracted from stool samples and used as template  
22 for next-generation sequencing library preparation and for quantitative polymerase chain  
23 reaction (qPCR). Whole metagenome shotgun sequencing will be performed using the  
24 HiSeq 2500 system. Raw metagenomic sequencing data will be quality-filtered and  
25 analysed through a well-validated bioinformatics pipeline using MetaPhlAn<sup>42</sup> and  
26 HUMAnN<sup>43</sup>. The compositional and predicted functional metagenomic data generated

1 will be used to identify signatures of SAM and to investigate associative links between  
2 specific gut microbial signatures and clinical outcomes.

### 5 *Metabolomics substudy*

6 During SAM, metabolic processes are altered in response to a starved environment, and  
7 may plausibly contribute to long-term clinical outcomes. Previous studies suggest that  
8 amino acid turnover, lipid metabolism, oxidative stress and other metabolic pathways are  
9 disrupted in SAM and may be associated with disease state and clinical outcome<sup>26 44 45</sup>;  
10 however, little is known about how the metabolic phenotype responds to nutritional  
11 therapy. It is hypothesised that disturbed gut microbiota composition and function may  
12 drive microbial metabolic dysregulation in addition to host-derived dysregulation. Of  
13 particular interest are differences in the metabolic phenotype between oedematous and  
14 non-oedematous SAM. The 'reductive adaptation' seen in non-oedematous SAM  
15 (utilisation of fat and muscle stores) is disrupted in oedematous SAM, which may  
16 contribute to differences in clinical outcomes. Specifically, protein turnover, inflammation,  
17 oxidative stress and bile acid metabolism are disrupted in oedematous-SAM, which may  
18 contribute to co-morbidities including diarrhoea, steatosis and enteropathy<sup>46 47</sup>.

19  
20 We hypothesize that: (i) a unique plasma and urine metabolic phenotype exists in  
21 oedematous compared with non-oedematous SAM during hospitalisation, which is  
22 independently associated with morbidity, mortality and nutritional recovery; (ii) the  
23 metabolic phenotype is partially restored to a healthy state with nutritional rehabilitation  
24 but reverts to a disturbed state during follow-up, which predicts morbidity, mortality and  
25 relapse; and (iii) both host-derived and gut microbial-driven metabolic dysregulation  
26 underlie clinical outcomes.

1

2 Using stored urine and plasma samples collected during hospitalisation, a cross-  
3 sectional investigation will determine differences in the metabolic phenotype between  
4 children with oedematous SAM, non-oedematous SAM and well-nourished controls.  
5 Urine and plasma metabolic phenotypes will be compared between groups at discharge  
6 and 12, 24 and 48 weeks post-discharge. Briefly, global untargeted metabolomic  
7 phenotyping will be performed via <sup>1</sup>H nuclear magnetic resonance (NMR) spectroscopy  
8 using a 700 MHz Bruker NMR spectrometer to identify metabolic signatures of SAM.  
9 Targeted analysis via ultra-performance liquid chromatography-mass spectrometry will  
10 be performed to examine specific pathways of interest, including tryptophan and bile  
11 acid metabolism.

12

### 13 *Immunology substudy*

14 Bacterial infections are common among children hospitalised for SAM<sup>23 48-50</sup> and  
15 mortality is driven by a range of species<sup>48 50-53</sup>, consistent with generalised defects in  
16 innate anti-bacterial defence. Increased infectious morbidity and mortality persist after  
17 discharge from hospital<sup>10 17 54</sup>, suggesting that restoration of anti-bacterial immune  
18 responses may lag behind nutritional rehabilitation. A recent randomised trial in children  
19 with SAM confirmed that deaths following hospitalisation were predominantly due to  
20 bacterial infections but were not prevented by daily co-trimoxazole prophylaxis<sup>17</sup>.  
21 Collectively, these observations highlight that children remain vulnerable to infection  
22 despite current treatment approaches; targeting persistent immune dysfunction could  
23 plausibly reduce infectious mortality after discharge<sup>24</sup>.

24

25 Multiple innate and adaptive immune mediators are dysregulated in malnutrition<sup>24 27 55</sup>.  
26 However, few studies have assessed cellular immune function in malnourished children;

1 most existing studies were undertaken decades ago on small cross-sectional cohorts  
2 without the benefit of recent advances in immunology techniques<sup>27</sup>. Immune dysfunction  
3 in SAM likely reflects both *intrinsic* defects, whereby immune cells lack capacity to  
4 adequately respond to infection, and *extrinsic* defects, where cells have intact anti-  
5 bacterial capacity but are chronically modulated by the systemic pro-inflammatory  
6 environment which characterises SAM (i.e. heightened pro-inflammatory cytokines<sup>44</sup> and  
7 circulating bacterial antigens<sup>23 56 57</sup>). Systemic inflammation is directly associated with  
8 mortality in SAM<sup>23</sup> and driven by multiple comorbidities, including bacterial translocation  
9 from the damaged gut into the blood, sub-clinical infections and metabolic  
10 dysregulation<sup>44 58 59</sup>. The implications of innate immune cell dysfunction for subsequent  
11 acquisition of infections and infectious mortality have not been investigated.

12  
13 We hypothesise that: (i) anti-bacterial functions of innate immune cells are compromised  
14 in SAM due to a combination of intrinsic and extrinsic defects; ii) innate immune cell  
15 function is independently associated with infectious morbidity and mortality during  
16 hospitalisation for SAM; and iii) nutritional rehabilitation only partly restores innate  
17 immune cell function, leading to an ongoing risk of bacterial infections post-discharge.

18  
19 Using blood samples collected at baseline, discharge and 12, 24 and 48 weeks post-  
20 discharge, the longitudinal relationship between circulating innate immune cell function  
21 and bacterial infections will be assessed. The intrinsic phagocytic capacity, secreted  
22 cytokine response and maturation state of innate immune cells after culture with  
23 bacterial antigens will be assessed. Plasma concentrations of endotoxin and pro-  
24 inflammatory mediators will be quantified at each time-point and the degree to which  
25 these extrinsic factors influence innate immune cell antibacterial function will be  
26 assessed via plasma co-culture with innate immune cells from healthy donors. Bacterial

1 infections during hospitalisation will be diagnosed using clinical criteria and blood  
2 culture, stool culture and urinalysis where available.

#### 4 **SAMPLE SIZES**

5 *Observational study:* The observational cohort will recruit as many children with SAM as  
6 possible during the period of enrolment (July 2016 to March 2018), estimated at 600-800  
7 children (capped at 800 maximum), to assess clinical and nutritional outcomes among  
8 HIV-positive and HIV-negative children hospitalised with SAM. Assuming mortality of  
9 15%, overall loss to follow-up of 15% and recruitment target of 800 children, there would  
10 be 560 evaluable children at 48 weeks, of whom 224 would have HIV-SAM based on an  
11 estimated inpatient HIV prevalence of 40%. This will provide >80% power to detect  
12 absolute differences of 17% in binary outcomes between HIV-SAM and HIV-negative  
13 children with SAM, and of 0.33 times the standard deviation in continuous outcomes.

14  
15  
16 *Enteropathy substudy:* The sample size was estimated using previously reported values  
17 for LM ratios, which remain a widely used non-invasive marker of enteropathy.  
18 Comparing 100 versus 100 children with two-sided  $\alpha=0.025$  (to allow for two primary  
19 comparisons, i.e. HIV-SAM versus HIV-negative children with SAM, and HIV-SAM  
20 versus well-nourished HIV-positive children) provides >80% power to detect differences  
21 in mean LM ratio during hospitalisation of at least 0.16 (assuming  $SD=0.36$ ), a difference  
22 which would be clinically relevant given the LM ratios previously reported for well-  
23 nourished children (0.42), malnourished children (1.3) and children with persistent  
24 diarrhoea (2.85) in the Gambia<sup>60</sup>. It also provides >80% power to detect differences of at  
25 least 0.1 in the mean change in LM ratio from enrolment (assuming  $SD$  for change= $0.23$   
26 and 7% missing samples). For inflammatory markers, comparing 100 versus 100

1 children with two-sided  $\alpha=0.025$  provides >80% power to detect differences in mean  
2  $\log_{10}$  concentrations of at least 0.44 times their standard deviation, or 2.75-fold  
3 differences between groups. Inclusion of well-nourished controls provides an indication  
4 of normal ranges in young African children. HIV-positive and HIV-negative SAM groups  
5 will be stratified to include approximately 50 children with and without oedematous  
6 malnutrition, if possible.

### 8 *Microbiota and metabolomics substudy*

9 Power calculations are difficult in metagenomics and metabolomic analyses due to the  
10 large number of observed outcomes and unknown effect sizes and variance. Previous  
11 studies using smaller sample sizes have identified significant taxonomic differences in  
12 twin pairs discordant for oedematous-SAM ( $n=13$ )<sup>25</sup> and metabolic differences between  
13 the two forms of SAM ( $n=40$ )<sup>26</sup>. These studies suggest that a difference of 50% in  
14 metabolites could be expected. Using ANCOVA, setting  $\alpha=0.05$  and assuming either low  
15 ( $\rho=0.1$ ) or high ( $\rho=0.7$ ) correlation, the study would require 95-126 subjects to achieve  
16 80% power<sup>61</sup>. False discovery rate (FDR) multiple correction testing will be applied to  
17 reduce the high-dimensionality of the data and limit false-positives.

### 19 *Immunology substudy*

20 Up to 200 children with SAM and 200 well-nourished controls will be included in a cross-  
21 sectional analysis of innate immune cell function during hospitalisation. Assuming similar  
22 infectious mortality to a recent Kenyan study (15%)<sup>17</sup>, a cohort of 200 provides 80%  
23 power to detect associations between immune profiles and infectious mortality at an  
24 odds ratio of 1.7 and 2-sided  $\alpha$  of 0.05. We will aim for 100 children with longitudinal  
25 analysis of innate immune cell function at discharge, 12, 24 and 48 weeks post-  
26 discharge<sup>17</sup>.



1

## 2 **STUDY OUTCOMES AND RISK FACTORS**

3 The main study outcomes are clinical (mortality, morbidity and relapse of malnutrition)  
4 and nutritional (weight, height, mid-upper arm circumference, leg length, head  
5 circumference, mid-thigh circumference, skin-fold thickness and body composition by  
6 bioimpedance vector analysis) assessed over 48 weeks of follow-up. Mortality is  
7 assessed in hospital by daily physician review and, post-discharge, through study visits  
8 and by telephone where possible for children who are lost to follow-up. Morbidity during  
9 hospitalization is assessed through daily clinical assessments and available hospital  
10 laboratory tests. Morbidity after discharge is assessed, first, using daily morbidity diaries,  
11 in which caregivers record episodes of illness (lethargy interfering with feeding;  
12 respiratory distress; diarrhoea; oedema and fever); second, from caregiver recall and  
13 review of handheld medical records at each follow-up visit; and, third, from data  
14 collected during hospitalization for children who are readmitted during the follow-up  
15 period. Time-to-recovery from malnutrition will be evaluated during hospitalization;  
16 relapse of malnutrition during follow-up will be categorized as moderate acute  
17 malnutrition, uncomplicated SAM and complicated SAM, according to WHO definitions.  
18 Nutritional outcomes will be expressed both as continuous variables (attained Z-score  
19 and change in Z-score between visits), and as categorical variables (moderate wasting,  
20 WHZ<-2; severe wasting, WHZ<-3; stunting, HAZ<-2; severe stunting, HAZ<-3;  
21 underweight, WAZ <-2; and microcephaly, head circumference-for-age <-2).

22

23 Risk factors will be evaluated at baseline, hospital discharge and over the period of  
24 follow-up for associations with clinical and nutritional outcomes. In addition to baseline  
25 clinical and demographic factors, the following laboratory parameters will be evaluated:  
26 haemoglobin, serum albumin, C-reactive protein, CD4 count and HIV viral load (for HIV-

1 positive children). Haemoglobin, CD4 and HIV-viral load will be measured in real time  
2 and the results reviewed during follow-up clinics.

3  
4 Data on potential confounders are collected at baseline, discharge and during the follow-  
5 up period, including child feeding practices, household socioeconomic status (defined by  
6 household income and cooking method), maternal employment and education, and  
7 household factors such as water, sanitation and hygiene practices, availability of  
8 electricity, location (rural, peri-urban or urban) and household size.

9

## 10 **ANALYSIS**

11 All analyses will be interpreted exploratively since HOPE-SAM is an observational study  
12 with multiple risk factors, outcomes and substudies. For all analyses, P values will not be  
13 artificially adjusted, but interpreted as exploring the strength of evidence supporting any  
14 association. The only exception is the use of approaches to minimise false discovery  
15 when analysing high-dimensional data from the microbiota and metabolomics  
16 substudies, as described.

### 17 18 *Observational Cohort*

19 The primary comparison will be the clinical and nutritional outcomes of children with HIV-  
20 SAM compared to HIV-negative children with SAM. We will review all deaths and  
21 adjudicate clinical diagnoses and causes of death to ensure robust and consistent data  
22 across sites. We will compare each participant's clinical management to WHO guidelines  
23 to identify any contributory factors in hospital care. Factors associated with outcomes  
24 during hospitalisation (e.g. mortality, nutritional recovery) will be determined for each  
25 group (HIV-SAM and HIV-negative children with SAM) using multivariable analysis (Cox  
26 models for time-to-event data, linear models for continuous outcomes). Factors

1 associated with outcomes over 48 weeks post-discharge (hospital re-admission,  
2 morbidity and mortality, relapse, anthropometry, body composition and response to  
3 ART) will be determined for each group (HIV-SAM and HIV-negative children with SAM)  
4 using multivariable analysis (Cox models for time-to-event data, linear models for  
5 continuous outcomes). HIV-positive children with SAM and HIV-negative children with  
6 SAM will be included in one model together with the risk factors, and interaction tests will  
7 be used to investigate whether associations between risk factors and outcomes differ  
8 between the two groups of children. We will evaluate the ability of mid-upper arm  
9 circumference (MUAC) at discharge to predict long-term outcomes using receiver-  
10 operator-characteristic (ROC) analysis, in the whole cohort and within the subgroups of  
11 HIV-SAM and HIV-negative children with SAM. We will then evaluate whether addition of  
12 other variables improves the predictive capacity of MUAC (using WHO criteria in those  
13 >6 months old, and published data for children <6 months<sup>62</sup>) for each group, including  
14 body composition, haemoglobin, albumin and CRP, plus CD4%, viral load and timing of  
15 ART initiation (HIV-SAM only). We will construct multivariable models and compare them  
16 with MUAC alone using the net-reclassification index.

### 17 18 *Body composition analysis*

19 Previous work in body composition by bio-electrical impedance in Ethiopian infants and  
20 children with SAM has shown that the conventional approach, predicting total body  
21 weight from height-adjusted impedance, fails due to confounding by oedema<sup>63</sup>. The  
22 same project validated an alternative approach, known as Bio-electrical Impedance  
23 Vector Analysis (BIVA), and described significant differences between each of three  
24 groups: healthy controls, oedematous-SAM and non-oedematous SAM. Vector analysis  
25 splits impedance into two height-adjusted components, resistance and reactance, which  
26 are further linked through phase angle (PA). Variability in these components is

1 associated with biochemical parameters<sup>64</sup>. These variables will be explored using  
2 graphical analysis, or transformed into age- and sex-adjusted Z-scores for statistical  
3 comparison, including longitudinal analyses. Higher phase angle indicates better  
4 nutritional status, while declining height-adjusted resistance over time indicates loss of  
5 oedema.

6

### 7 *Enteropathy substudy*

8 The primary comparison for the enteropathy substudy will be between HIV-positive  
9 children with SAM (group A) and HIV-negative children with SAM (group C), stratified by  
10 presence or absence of oedema. Control groups (B and D) are well-nourished children  
11 with or without HIV, to provide normative data for biomarkers and to evaluate the impact  
12 of SAM within each HIV group. Thus, biomarkers among HIV-positive children with SAM  
13 will first be compared to HIV-negative children with SAM (to evaluate the impact of HIV)  
14 and, second, to well-nourished HIV-positive children (to evaluate the impact of SAM).  
15 Biomarkers among HIV-negative children with SAM will be compared to well-nourished  
16 HIV-negative children. For each continuous outcome, simple descriptive analysis will be  
17 used to compare groups during hospitalisation using t-tests on appropriately transformed  
18 data. For any outcome with moderate ( $p < 0.05$ ) evidence of difference between either  
19 group a regression model will be constructed including groups A, B, C, D to directly test  
20 (using interactions) whether there is a synergistic effect of HIV-SAM versus HIV-negative  
21 SAM versus HIV alone versus neither. These models will also be used to explore  
22 whether there is any evidence for heterogeneity in effects between oedematous and  
23 non-oedematous SAM. Associations between enrolment factors (e.g. intestinal  
24 permeability and microbial translocation) will be explored using pairwise Spearman  
25 correlations and principal components analysis. Mean changes at the follow-up time-  
26 points in each group will be estimated, and groups compared (as above) using

1 generalised estimating equations. For outcomes that differ across SAM groups over  
2 time, multilevel models will be used to explore possible predictors from the other factors  
3 measured. Time to nutritional recovery will be compared using Kaplan-Meier and log-  
4 rank tests, and Cox models to adjust for baseline differences between groups.

#### 6 *Microbiota and metabolomics substudy*

7 The primary comparison will be between HIV-negative children with oedematous and  
8 non-oedematous SAM, with a separate comparison between HIV-positive children with  
9 SAM and HIV-negative children with SAM. Analyses will examine: (i) differences in  
10 metagenomic/metabolomic variables between groups at each time-point; (ii) differences  
11 in metagenomic/metabolomic variables within groups over time; (iii) correlations between  
12 metagenomic and metabolomic variables; and (iv) correlations between  
13 metagenomic/metabolomic variables and clinical outcomes. A systematic analysis will be  
14 undertaken to reduce high-dimensional data, integrate the multi-omics datasets and  
15 minimise false discovery.

16  
17 Compositional metagenomic data will be compared between groups for indices of alpha  
18 and beta diversity. Principal coordinate analysis and partial least squares discriminant  
19 analysis will be performed on metabolomics data to identify overall differences between  
20 groups. High-dimensional datasets will be reduced using random forest models to  
21 identify taxa, microbial gene families and metabolites that most strongly contribute to  
22 differences between groups, corrected by Benjamini-Hochburg false discovery rate  
23 detection. Targeted analysis by qRT-PCR will validate differential abundance or  
24 expression of candidate microbial genes. Longitudinal comparisons will be performed  
25 within and between groups using multilevel simultaneous component analysis.  
26 Orthogonal projections to latent structures models will integrate metabolomic and

1 metagenomic data whilst linear regression, canonical correlation and hierarchal  
2 clustering analysis will measure correlations between -omics datasets. Finally, ROC  
3 analysis will identify the ability of different analytes to predict long-term nutritional and  
4 clinical outcomes.

5

#### 6 *Immunology substudy*

7 Integrated profiles of innate immune cell function will be generated for each child using  
8 principal components analysis followed by hierarchical clustering<sup>65 66</sup>. This data-  
9 reduction method identifies whether absolute levels of specific markers or relative  
10 differences between markers differentiate children into groups. The resulting innate  
11 immune profiles will be compared between HIV-SAM, HIV-negative children with SAM  
12 and well-nourished groups using univariable tests and multivariable analysis of variance  
13 (MANOVA) of the principal components.

14

15 To address the relationship between immune function and infections, regression  
16 analyses will determine whether baseline innate immune profiles (or the individual  
17 parameters defining them) are associated with the infectious morbidity or mortality  
18 during hospitalisation, using logistic models for binary outcomes and linear models for  
19 duration. Key clinical characteristics, including age, sex, oedema and baseline WHZ, will  
20 be added to models to investigate their confounding effects. Multivariable stacked  
21 regression methods will be used to compare the impact of different factors on severe  
22 bacterial infections based on heterogeneity tests.

23

24 To determine whether treatment for SAM restores innate immune cell antibacterial  
25 function, mixed effects regression models will compare longitudinal changes in individual  
26 immune parameters, and the principal components calculated from the weights identified

1 at baseline (which include well-nourished controls). Similarities and differences in  
2 longitudinal immune profiles will be compared between groups using nonmetric multi-  
3 dimensional scaling<sup>65 67 68</sup>. This approach will group children according to their composite  
4 innate immune function, allowing the duration and variability of immune restoration to be  
5 evaluated over the course of nutritional rehabilitation. Binary logistic regression will  
6 determine whether innate immune profiles at discharge are associated with morbidity or  
7 mortality during follow-up.

## 9 **PATIENT AND PUBLIC INVOLVEMENT**

10 Patients and their caregivers were not involved in the design of the study. During  
11 recruitment, all caregivers of children admitted to hospital were given information about  
12 the study; those whose children had severe acute malnutrition were approached to give  
13 written informed consent. A meeting to disseminate results of the study to participants  
14 and their caregivers will be held at the end of the study. An interactive game to engage  
15 caregivers in the science underlying malnutrition is being developed in collaboration with  
16 experts from the Centre of the Cell, a unique science education centre based at Queen  
17 Mary University of London (<https://www.centreofthecell.org/>).

## 20 **SAFETY REPORTING**

21 For all adverse events, the study team will assess expectedness and relatedness to  
22 study activities. Since this is an observational study without interventions, we anticipate  
23 that the risk is minimal; however, serious adverse events will be reported to local ethical  
24 review boards (Medical Research Council of Zimbabwe, and University of Zambia  
25 Biomedical Research Ethics Committee) and the study sponsor (Queen Mary University  
26 of London) according to their respective guidelines.

1  
2  
3 1  
45 2 **DATA COLLECTION AND MONITORING**  
6

7 3 Clinical and demographic data are recorded on paper case report forms. All data are  
8  
9 4 checked for completeness and plausibility before data entry and problems flagged for  
10  
11 5 resolution by the clinical team. All data are double-entered onto a dedicated password-  
12  
13 6 protected online study database, and any discrepancies resolved. Study participants are  
14  
15 7 identified on electronic databases only by study numbers (assigned at enrolment); no  
16  
17 8 personal identifiers are entered.  
18

19  
20 9  
2122 10 **ETHICS AND DISSEMINATION**  
23

24 11 The study complies with the principles of the Declaration of Helsinki (2008) and is  
25  
26 12 conducted in compliance with the principles of Good Clinical Practice (GCP) and local  
27  
28 13 regulatory requirements in each country. Ethical approval was obtained from the  
29  
30 14 University of Zambia Biomedical Research Ethics Committee, the Joint Research Ethics  
31  
32 15 Committee of the University of Zimbabwe and the Medical Research Council of  
33  
34 16 Zimbabwe. The ethical review board of the Sponsor, Queen Mary University of London,  
35  
36 17 provided an advisory review of the study. Since this is an observational study, there is no  
37  
38 18 Data and Safety Monitoring Board.  
39

40  
41 19  
42

43 20 Results will be disseminated through conference abstracts and peer-reviewed publications  
44  
45 21 and discussed with relevant policymakers and programmers. Study findings will be  
46  
47 22 disseminated to families of participants at face-to-face meetings.  
48

49 23  
5051 24 **TIME FRAME AND STUDY STATUS**  
52  
53  
54  
55  
56  
57  
58  
59  
60



1  
2  
3 1 Enrolment into the study began in July 2016 and is expected to end in March 2018. All  
4  
5 2 participants will be followed for 48 weeks, with an expected study completion date of  
6  
7 3 March 2019.  
8  
9 4

## 11 5 **DISCUSSION**

13 6 HOPE-SAM aims to document the short- and long-term clinical and nutritional outcomes  
14  
15 7 of HIV-positive and HIV-negative children with SAM, and to identify the factors at  
16  
17 8 presentation and at discharge from hospital that independently predict these outcomes.  
18  
19 9 Mechanistic substudies aim to evaluate the contribution of enteropathy, microbiota,  
20  
21 10 metabolome and innate immune cell function to these clinical outcomes. The prevalence  
22  
23 11 of malnutrition in HIV-positive children is as high as 40% in some settings and the  
24  
25 12 challenges of managing this population are well recognised<sup>69</sup>. The WHO protocol on  
26  
27 13 management of SAM aims to reduce case fatality below 10%, but rates as high as 35%  
28  
29 14 are still reported among HIV-positive children<sup>5 70</sup>. No studies have systematically and  
30  
31 15 longitudinally collected morbidity data in HIV-SAM, or documented repeat  
32  
33 16 hospitalisations and mortality after discharge from hospital, particularly in the current era  
34  
35 17 where ART is available upon diagnosis. HOPE-SAM will provide a unique opportunity to  
36  
37 18 enrol and follow a cohort of children managed for SAM in three large hospitals across  
38  
39 19 two sub-Saharan African countries at several time-points over a one-year period. Nested  
40  
41 20 longitudinal laboratory substudies aim to better characterise the pathogenesis of SAM in  
42  
43 21 HIV-positive and HIV-negative children, to determine whether pathogenic processes are  
44  
45 22 normalised during nutritional rehabilitation and follow-up, and to identify potential  
46  
47 23 mechanistic pathways. Our ultimate goal is to utilise the findings generated in this study  
48  
49 24 to inform new intervention approaches that can be evaluated in clinical trials to improve  
50  
51 25 outcomes among children with SAM.  
52  
53  
54  
55  
56 26

## 1 **ACKNOWLEDGEMENTS**

2 Members of the HOPE-SAM study team not listed in the author list: *Harare, Zimbabwe:*  
3 Virginia Sauramba, Adlight Dandadzi, Chipo Kureva, Johnson Mushonga, Eddington  
4 Mpofu, Washington Dune, Tafadzwa Chidhanguro, Sibongile Nkiwane, Sandra Rukobo,  
5 Margaret Govha, Patience Mashayanembwa, Leah Chidamba, Bernard Chasekwa,  
6 Joice Tome, Rachel Makasi, Wellington Murenjekekwa, Theodore Chidawanyika,  
7 Blessing Tsenesa, Stephen Moyo, Penias Nyamwino, Pururudzai Simango, Shepherd  
8 Seremwe, Lovemore Chingaoma and Sarudzai Kasaru. *Lusaka, Zambia:* Andreck  
9 Tembo, Mary Mpundu, Evelyn Nyendwa, Gwendolyn Nayame, Dalitso Tembo, Sophreen  
10 Mwaba, Esther Chilala, Lucy Macwani, Tenzeni Dumba, Miyoba Chipunza, Lydia  
11 Kazhila, Temwaninge Gondwe, Dennis Phiri, Mpala Mwanza, Kanekwa Zyambo.

12  
13 We thank Philippa Rambanepasi, Karen Gwanzura and Agatha Muyenga for financial  
14 management of the study; Zinah Sorefan and Daniela Azurunwa for study coordination  
15 at Queen Mary University of London; Professor Kim Michaelsen for the use of the  
16 electronic knemometers and advice on their use; Dr Gemma Buxton for her help in  
17 drafting the case report forms used in the study; and we remember the hard work of  
18 Edith Mukusho who sadly passed away during the HOPE-SAM study. We thank the staff  
19 and management and members of the Department of Paediatrics and Child Health at the  
20 three hospital sites who have made this study possible. We are indebted to the  
21 caregivers, families and children who are participating in the HOPE-SAM study.

22

## 1 AUTHOR CONTRIBUTIONS

2 *Designed study:* MB-D, BA, CDB, RCR, BM, KC, CK, KCh, DN, PC, NC, FM, JW, ARM,

3 JS, ASW, KJN, PK, AJP

4 *Sought funding:* MB-D, BA, CDB, RCR, JHH, ARM, JS, ASW, KJN, PK, AJP

5 *Undertaking study:* BM, KC, CK, KCh, FM, DN, PC, NC, FM, IM, EB, KM, SM, TR

6 *Study oversight:* MB-D, BA, JHH, KJN, PK, AJP

7 *Analysis:* MB-D, BA, CDB, RCR, RN, JW, ARM, JS, ASW, KJN, PK, AJP

8 *Wrote first draft of manuscript:* MB-D, CDB, RCR, AJP

9 *Critically revised manuscript:* All

10

## 11 FUNDING

12 This work was supported by the Medical Research Council UK (MR/K012711/1), the

13 Wellcome Trust (107634/Z/15/Z to MB-D; 206225/Z/17/Z to CDB, an award funded in

14 partnership with the Royal Society; 206455/Z/17/Z to RCR; and 108065/Z/15/Z to AJP),

15 and a Bio-Resource Grant from the Centre for Genomic Health within the Life Sciences

16 Initiative at Queen Mary University of London.

17

## 18 COMPETING INTERESTS

19 None of the authors have any competing interests to declare.

20

21

22

23

24

25

26

1  
2  
3 1  
4  
5 2  
6  
7  
8  
9  
10  
11  
12  
13  
14  
15  
16  
17  
18  
19  
20  
21  
22  
23  
24  
25  
26  
27  
28  
29  
30  
31  
32  
33  
34  
35  
36  
37  
38  
39  
40  
41  
42  
43  
44  
45  
46  
47  
48  
49  
50  
51  
52  
53  
54  
55  
56  
57  
58  
59  
60

For peer review only

1  
2  
3 1  
45 2  
6 3  
7 3  
8 4  
9 5  
10 6  
11 7  
12 8  
13 9  
14 10  
15 11  
16 12  
17 13  
18 14  
19 15  
20 16  
21 17  
22 18  
23 19  
24 20  
25 21  
26 22  
27 23  
28 24  
29 25  
30 26  
31 27  
32 28  
33 29  
34 30  
35 31  
36 32  
37 33  
38 34  
39 35  
40 36  
41 37  
42 38  
43 39  
44 40  
45 41  
46 42  
47 43  
48 44  
49  
50  
51  
52  
53  
54  
55  
56  
57  
58  
59  
60

- References
1. Black R E, Victora C G, Walker S P, et al. Maternal and child undernutrition and overweight in low-income and middle-income countries. *Lancet* 2013;382:427–51.
  2. World Health Organisation. Guideline Updates on the management of severe acute malnutrition in infants and children: World Health Organisation, Geneva, 2013. Available at <http://apps.who.int/iris/handle/10665/95584>
  3. Lenters LM, Wazny K, Webb P, et al. Treatment of severe and moderate acute malnutrition in low- and middle-income settings: a systematic review, meta-analysis and Delphi process. *BMC Public Health* 2013;13 (Supp 3):S23.
  4. Golden MHN. Oedematous malnutrition. *British Medical Bulletin* 1998;54(2):433-44.
  5. Schofield C, A. A. Why have mortality rates for severe malnutrition remained so high? *Bull World Health Organ* 1996;74(2):223-29.
  6. Munthali T, Jacobs C, Sitali L, et al. Mortality and morbidity patterns in under-five children with severe acute malnutrition (SAM) in Zambia: a five-year retrospective review of hospital-based records (2009–2013). *Archives of Public Health* 2015;73(23)
  7. Preidis G A, McCollum E D, Mwansambo C, et al. Pneumonia and Malnutrition are Highly Predictive of Mortality among African Children Hospitalized with Human Immunodeficiency Virus Infection or Exposure in the Era of Antiretroviral Therapy. *Journal of Pediatrics* 2011;159(3):484-89.
  8. World Health Organisation G. Global guidance on criteria and processes for validation: Elimination of Mother-to-Child transmission of HIV and Syphilis. Geneva: World Health Organization, 2017. Available at <https://www.who.int/reproductivehealth/publications/emtct-hiv-syphilis/en/>
  9. Evans C, Jones CE, Prendergast AJ. HIV-exposed, uninfected infants: new global challenges in the era of paediatric HIV elimination. *Lancet Infectious Diseases* 2016; 16(6): e92-e107
  10. Heikens GT, Bunn J, Amadi A, et al. Case management of HIV-infected severely malnourished children: challenges in the area of highest prevalence. *Lancet* 2008;371:1305-7.
  11. Kerac M, Bunn J, Chagaluka G, et al. Follow-Up of Post-Discharge Growth and Mortality after Treatment for Severe Acute Malnutrition (FuSAM Study): A Prospective Cohort Study. *Plos One* 2014;9(6): e96030
  12. Lelijveld M, Seal A, Wells J C, et al. Chronic disease outcomes after severe acute malnutrition in Malawian children (ChroSAM): a cohort study. *Lancet Global Health* 2016;4:e654-62.
  13. Moisi JC, Gatakaa H, Berkley JA, et al. Excess child mortality after discharge from hospital in Kilifi, Kenya: a retrospective cohort analysis. *Bull World Health Organ* 2011;89:725-32A.

1  
2  
3  
4  
5  
6  
7  
8  
9  
10  
11  
12  
13  
14  
15  
16  
17  
18  
19  
20  
21  
22  
23  
24  
25  
26  
27  
28  
29  
30  
31  
32  
33  
34  
35  
36  
37  
38  
39  
40  
41  
42  
43  
44  
45  
46  
47  
48  
49  
50  
51  
52  
53  
54  
55  
56  
57  
58  
59  
60

14. Wiens MO, Pawluk S, Kiskoos N, et al. Pediatric Post-Discharge Mortality in Resource Poor Countries: A Systematic Review. *Plos One* 2013;8(6): e66698
15. Ngari MM, Fegan G, Mwangome MK, et al. Mortality after Inpatient Treatment for Severe Pneumonia in Children: a Cohort Study. *Paediatric and Perinatal Epidemiology* 2017;31:233-42.
16. Fergusson P, Chinkhumba J, Grijalva-Eternod C, et al. Nutritional recovery in HIV-infected and HIVuninfected children with severe acute malnutrition. *Archives of Diseases in Children* 2009;94:512-16.
17. Berkley JA, Ngari M, Johnstone T, et al. Daily co-trimoxazole prophylaxis to prevent mortality in children with complicated severe acute malnutrition: a multicentre, double-blind, randomised placebo-controlled trial. *Lancet Global Health* 2016;4(7):e464 - e73
18. DeBoer M D, Lima A A M, Oría R B, et al. Early childhood growth failure and the developmental origins of adult disease: Do enteric infections and malnutrition increase risk for the metabolic syndrome? *Nutrition Reviews* 2012 70(11):642-53.
19. Barouki R, Gluckman P D, Grandjean P, et al. Developmental origins of non-communicable disease: Implications for research and public health. *Environmental Health* 2012;11:42
20. Davey Smith G, Greenwood R, Gunnell D, et al. Leg length, insulin resistance, and coronary heart disease risk: The Caerphilly Study. *Journal of Epidemiology Community Health* 2001;55:867-72.
21. Gunnell D, Whitley E, Upton MN, et al. Associations of height, leg length, and lung function with cardiovascular risk factors in the Midspan Family Study. *Journal of Epidemiology Community Health* 2002;57:141-46.
22. Jones K D, Thitiri J, Ngari M, et al. Childhood malnutrition: Toward an understanding of infections, inflammation, and antimicrobials. *Food and Nutrition Bulletin* 2014;35(2 Suppl): S64-70
23. Attia S, Versloot CJ, Voskuil W, et al. Mortality in children with complicated severe acute malnutrition is related to intestinal and systemic inflammation: an observational cohort study. *American Journal of Clinical Nutrition* 2016;104:1441-9.
24. Bourke CD, Berkley J A, Prendergast AJ. Immune Dysfunction as a Cause and Consequence of Malnutrition. *Trends in Immunology* 2016;37(6):386-89.
25. Smith MI, Yatsunenko T, Manary MJ, et al. Gut microbiomes of Malawian twin pairs discordant for kwashiorkor. *Science* 2013;339(6119):548-54.
26. Di Giovanni V, Bourdon C, Wang DX, et al. Metabolomic Changes in Serum of Children with Different Clinical Diagnoses of Malnutrition. *Journal of Nutrition* 2016;146:2436-44.
27. Rytter MJH, Kolte L, Briend A, et al. The Immune System in Children with Malnutrition—A Systematic Review. *Plos One* 2014;9(8):e105017
28. Blanton LV, Charbonneau MR, Salih T, et al. Gut bacteria that prevent growth impairments transmitted by microbiota from malnourished children. *Science* 2016;351(6275)
29. Subramanian S, Huq S, Yatsunenko T, et al. Persistent gut microbiota immaturity in malnourished Bangladeshi children. *Nature* 2014;510(7505):417-21.

- 1 30. Prendergast A, Kelly P. Review: Enteropathies in the developing world:  
2 neglected effects on global health. *Am J Trop Med Hyg* 2012;86:756-63.
- 3 31. Lutwama F, Kagina BM, Wajja A, et al. Distinct T-Cell Responses When BCG  
4 Vaccination Is Delayed From Birth to 6 Weeks of Age in Ugandan Infants. *The*  
5 *Journal of Infectious Diseases* 2014;209(6):887-97.
- 6 32. Prendergast AJ, Humphrey JH, Mutasa K, et al. Assessment of Environmental  
7 Enteric Dysfunction in the SHINE Trial: Methods and Challenges. *Clin Infect*  
8 *Dis* 2015;61 (suppl 7):S685-702.
- 9 33. World Health Organisation. Management of severe malnutrition : a manual for  
10 physicians and other senior health workers. WHO, 1999. Available at  
11 <http://apps.who.int/iris/handle/10665/41999>
- 12 34. World Health Organisation. Consolidated guidelines on the use of antiretroviral  
13 drugs for treating and preventing HIV infection: Recommendations for a  
14 public health approach. WHO, 2016. Available at  
15 <http://www.who.int/hiv/pub/arv/arv-2016/en/>
- 16 35. Costiniuk CT, JB. A. Human immunodeficiency virus and the gastrointestinal  
17 immune system: does highly active antiretroviral therapy restore gut  
18 immunity? *Nature* 2012;5(6):596-604.
- 19 36. Brenchley JM, Douek DC. HIV infection and the gastrointestinal immune  
20 system. *Nature* 2008;1(1) doi: doi:10.1038/mi.2007.1
- 21 37. Amadi B, Besa E, Zyambo K, et al. Impaired Barrier Function and Autoantibody  
22 Generation in Malnutrition Enteropathy in Zambia. *EBioMedicine*  
23 2017;22(Supplement C):191-99.
- 24 38. Kau AL, Ahern PP, Griffin NW, et al. Human nutrition, the gut microbiome and  
25 the immune system. *Nature* 2011;474(7351):327-36.
- 26 39. Kau AL, Planer JD, Liu J, et al. Functional characterization of IgA-targeted  
27 bacterial taxa from undernourished Malawian children that produce diet-  
28 dependent enteropathy. *Sci Transl Med* 2015;7(276):276ra24.
- 29 40. Monaco CL, Gootenberg DB, Zhao G, et al. Altered Virome and Bacterial  
30 Microbiome in Human Immunodeficiency Virus-Associated Acquired  
31 Immunodeficiency Syndrome. *Cell Host Microbe* 2016;19(3):311-22.
- 32 41. Amadi B, Fagbemi AO, Kelly P, et al. Reduced production of sulfated  
33 glycosaminoglycans occurs in Zambian children with kwashiorkor but not  
34 marasmus. *Am J Clin Nutr* 2009;89(2):592-600.
- 35 42. Segata N, Waldron L, Ballarini A, et al. Metagenomic microbial community  
36 profiling using unique clade-specific marker genes. *Nature methods*  
37 2012;9(8):811-4.
- 38 43. Abubucker S, Segata N, Goll J, et al. Metabolic reconstruction for metagenomic  
39 data and its application to the human microbiome. *PLoS computational*  
40 *biology* 2012;8(6):e1002358.
- 41 44. Bartz S, Mody A, Hornik C, et al. Severe Acute Malnutrition in Childhood:  
42 Hormonal and Metabolic Status at Presentation, Response to Treatment and  
43 Predictors of Mortality. *Journal of Clinical and Endocrine Metabolism*  
44 2014;99(6):2128-37.

- 1  
2  
3 1 45. Farras M, Chandwe K, Mayneris-Perxachs J, et al. Characterizing the metabolic  
4 2 phenotype of intestinal villus blunting in Zambian children with severe acute  
5 3 malnutrition and persistent diarrhoea. *Plos One* 2018;13(3):e0192092  
6 4  
7 4 46. Mayneris-Perxachs J, Lima AA, Guerrant RL, et al. Urinary N-methylnicotinamide  
8 5 and  $\beta$ -aminoisobutyric acid predict catch-up growth in undernourished  
9 6 Brazilian children. *Sci Rep* 2016;6:19780. doi: 10.1038/srep19780  
10 7  
11 7 47. Manary MJ, Leeuwenburgh C, Heinecke JW. Increased oxidative stress in  
12 8 kwashiorkor. *J Pediatr* 2000;137(3):421-4.  
13 9  
14 9 48. Chisti MJ, Salam MA, Bardhan PK. Severe Sepsis in Severely Malnourished Young  
15 10 Bangladeshi Children with Pneumonia: A Retrospective Case Control Study.  
16 11 *Plos One* 2015;10(10):e0139966.  
17 12  
18 12 49. Page A-L, de Rekeneire N, Sayadi S, et al. Infections in children admitted with  
19 13 complicated severe acute malnutrition in Niger. *Plos One* 2013;8(7):e68699  
20 14  
21 14 50. Jones KDJ, A BJ. Severe acute malnutrition and infection. *Paediatrics and  
22 15 International Child Health* 2014;34(sup 1):S1-S29.  
23 16  
24 16 51. Bahwere P, Levy J, Philippe H, et al. Community-Acquired Bacteremia among  
25 17 Hospitalized Children in Rural Central Africa. *International Journal of  
26 18 Infectious Diseases* 2001;5:180-88.  
27 19  
28 19 52. Thuo N, Ohuma E, Karisa J, et al. The prognostic value of dipstick urinalysis in  
29 20 children admitted to hospital with severe malnutrition. *Archives of Diseases in  
30 21 Childhood* 2010;95(6):422-6.  
31 22  
32 22 53. Berkley J A, Lowe BS, Mwangi I, et al. Bacteremia among Children admitted to a  
33 23 rural Hospital in Kenya. *New England Journal of Medicine* 2005;352:39-47.  
34 24  
35 24 54. Chang CY, Trehan I, Wang R J, et al. Children Successfully Treated for Moderate  
36 25 Acute Malnutrition Remain at Risk for Malnutrition and Death in the  
37 26 Subsequent Year after Recovery. *Journal of Nutrition* 2013;143:215-20.  
38 27  
39 27 55. Ibrahim MK, Zambruni M, Melby CL, et al. Impact of Childhood Malnutrition on  
40 28 Host Defense and Infection. *Clinical Microbiology Reviews* 2017;30(4):919-71.  
41 29  
42 29 56. Hughes SM, Amadi B, Mwiya M, et al. Dendritic cell anergy results from  
43 30 endotoxemia in severe malnutrition. *Journal of Immunology*  
44 31 2009;183(4):2818-26.  
45 32  
46 32 57. Jones K. D, Hüntten-Kirsch B, Laving AM, et al. Mesalazine in the initial  
47 33 management of severely acutely malnourished children with environmental  
48 34 enteric dysfunction: a pilot randomized controlled trial. *BMC Med* 2014;12  
49 35 doi: 10.1186/s12916-014-0133-2  
50 36  
51 36 58. Watanabe K, A. PJW. Environmental Enteropathy: Elusive but Significant  
52 37 Subclinical Abnormalities in Developing Countries. *EBioMedicine*  
53 38 2016;10:25-32.  
54 39  
55 39 59. Kelly P, Besa E, Zyambo K. Endomicroscopic and Transcriptomic Analysis of  
56 40 Impaired Barrier Function and Malabsorption in Environmental Enteropathy.  
57 41 *Plos Neglected Tropical Diseases* 2016;10(4):e00046000.  
58 42  
59 42 60. Behrens RH, Lunn PG, Northrop CA, et al. Factors affecting the integrity of the  
60 43 intestinal mucosa of Gambian children. *American Journal of Clinical Nutrition*  
61 44 1987;45:1433-41.



- 1  
2  
3  
4  
5  
6  
7  
8  
9  
10  
11  
12  
13  
14  
15  
16  
17  
18  
19  
20  
21  
22  
23  
24  
25  
26  
27  
28  
29  
30  
31  
32  
33  
34  
35  
36  
37  
38  
39  
40  
41  
42  
43  
44  
45  
46  
47  
48  
49  
50  
51  
52  
53  
54  
55  
56  
57  
58  
59  
60
- 1 61. Borm GF, Fransen J, WA L. A simple sample size formula for analysis of  
2 covariance in randomized clinical trials. *Journal of Clinical Epidemiology*  
3 2007;60(12):1234-8.
  - 4 62. Mwangome M, Ngari M, Fegan G, et al. Diagnostic criteria for severe acute  
5 malnutrition among infants aged under 6 mo. *The American journal of clinical*  
6 *nutrition* 2017;105(6):1415-23.
  - 7 63. Girma T, Kæstel P, Workeneh N, et al. Bioimpedance index for measurement of  
8 total body water in severely malnourished children: Assessing the effect of  
9 nutritional oedema. *Clinical Nutrition* 2016; 35(3):713-7.
  - 10 64. Girma T, Hother Nielsen AL, Kæstel P, et al. Biochemical and anthropometric  
11 correlates of bio-electrical impedance parameters in severely malnourished  
12 children: A cross-sectional study. *Clinical Nutrition* 2017; 37(2):701-705.
  - 13 65. Bourke CD, Nausch N, Rujeni N, et al. Integrated Analysis of Innate, Th1, Th2,  
14 Th17, and Regulatory Cytokines Identifies Changes in Immune Polarisation  
15 Following Treatment of Human Schistosomiasis. *The Journal of Infectious*  
16 *Diseases* 2013;208(1):159-69.
  - 17 66. Prendergast AJ, Szubert AJ, Berejena C, et al. Baseline Inflammatory Biomarkers  
18 Identify Subgroups of HIV-Infected African Children With Differing  
19 Responses to Antiretroviral Therapy. *Journal of Infectious Diseases*  
20 2016;214:226-36
  - 21 67. Bourke CD, Mutapi F, Nausch N, et al. Trichuris suis ova therapy for allergic  
22 rhinitis does not affect allergen-specific cytokine responses despite a  
23 parasite-specific cytokine response. *Clinical and Experimental Allergy*  
24 2012;42:1582-95.
  - 25 68. Bourke CD, Nausch N, Rujeni N, et al. Cytokine Responses to the Anti-  
26 schistosome Vaccine Candidate Antigen Glutathione-S-transferase Vary with  
27 Host Age and Are Boosted by Praziquantel Treatment. *Plos Neglected Tropical*  
28 *Diseases* 2014;8(5)
  - 29 69. Fergusson P, Tomkins A. HIV prevalence and mortality among children  
30 undergoing treatment for severe acute malnutrition in sub-Saharan Africa: a  
31 systematic review and meta-analysis. *Transactions of the Royal Society of*  
32 *Tropical Medicine and Hygiene* 2009;103(6):541-48.
  - 33 70. Chinkhumba J, Tomkins A, Banda C, et al. The impact of HIV on mortality during  
34 in-patient rehabilitation of severely malnourished children in Malawi.  
35 *Transactions of the Royal Society of Tropical Medicine and Hygiene*  
36 2008;102(7):639-44.

1  
2  
3 **1 FIGURE LEGENDS**

4 **2**  
5 **3 Figure 1: Study flow chart.**

6  
7 4 All hospital admissions are screened for eligibility for the observational cohort and  
8  
9 5 enteropathy sub-study, with procedures undertaken as shown in the flow chart during  
10  
11 6 hospitalisation and post-discharge. Well-nourished children from outpatient clinics and  
12  
13 7 the community meeting eligibility criteria as well-nourished controls are enrolled and  
14  
15 8 undergo a single baseline assessment as shown. The immunology, microbiota and  
16  
17 9 metabolomics sub-studies enrol children as shown. All children with SAM, regardless of  
18  
19 10 which arm of the study they are enrolled into, are followed for 48 weeks post-discharge.

20  
21  
22 11 <sup>1</sup>The immunology substudy started from 1<sup>st</sup> June 2017 and required children to have a  
23  
24 12 blood sample >2mL to conduct cellular assays.  
25

26 13

27 14

28  
29 15

30  
31 16

32  
33 17

34  
35 18

36  
37 19

38  
39 20

40  
41 21

42  
43 22

44  
45 23

46  
47 24

48  
49 25

50  
51 26

52  
53 27

54  
55 28  
56  
57  
58  
59  
60

1  
2  
3  
4  
5  
6  
7  
8  
9  
10  
11  
12  
13  
14  
15  
16  
17  
18  
19  
20  
21  
22  
23  
24  
25  
26  
27  
28  
29  
30  
31  
32  
33  
34  
35  
36  
37  
38  
39  
40  
41  
42  
43  
44  
45  
46  
47  
48  
49  
50  
51  
52  
53  
54  
55  
56  
57  
58  
59  
60

1

For peer review only

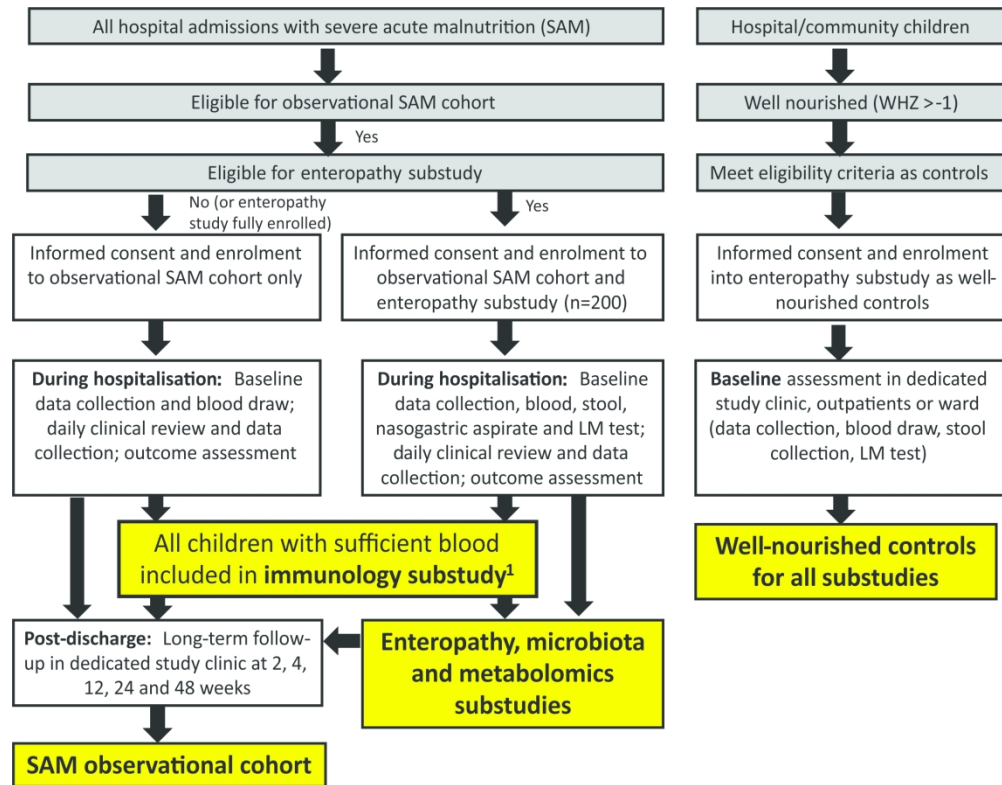

204x159mm (300 x 300 DPI)

**Supplementary Table 1: Assays undertaken on stored samples for children in the observational cohort and immunology substudy.**

| Sample type | Assay (method)                                                                                   | Location of work                    | Study subjects        | Baseline | Discharge | Week 12 | Week 24 | Week 48 |
|-------------|--------------------------------------------------------------------------------------------------|-------------------------------------|-----------------------|----------|-----------|---------|---------|---------|
| Blood       | HIV testing (rapid antibody test algorithm if >18 mo old or HIV DNA PCR <18 mo old) <sup>1</sup> | TROPGAN, Zvitambo or clinical sites | All                   | X        |           |         |         |         |
| Blood       | CD4 count (flow cytometry or PIMA) <sup>1</sup>                                                  | TROPGAN, Zvitambo or clinical sites | All HIV-positive      | X        | X         | X       | X       | X       |
| Plasma      | HIV viral load (real-time PCR) <sup>1</sup>                                                      | TROPGAN, Zvitambo or clinical sites | All HIV-positive      | X        | X         | X       | X       | X       |
| Plasma      | C-reactive protein (ELISA)                                                                       | TROPGAN, Zvitambo                   | All                   | X        | X         | X       | X       | X       |
| Plasma      | Albumin (ELISA)                                                                                  | TROPGAN, Zvitambo                   | All                   | X        | X         | X       | X       | X       |
| Plasma      | Lipopolysaccharide (LAL assay)                                                                   | TROPGAN and Zvitambo                | Subgroup <sup>3</sup> | X        | X         | X       | X       | X       |
| Plasma      | Lipopolysaccharide binding protein (LBP)                                                         | TROPGAN and Zvitambo                | Subgroup <sup>3</sup> | X        | X         | X       | X       | X       |
| Plasma      | sCD14 (ELISA)                                                                                    | TROPGAN and Zvitambo                | Subgroup <sup>3</sup> | X        | X         | X       | X       | X       |
| Plasma      | sCD163 (ELISA)                                                                                   | TROPGAN and Zvitambo                | Subgroup <sup>3</sup> | X        | X         | X       | X       | X       |
| Plasma      | IL-6, TNF-alpha, IL-1 $\beta$ (ELISA) and/or multiplex cytokines                                 | TROPGAN and Zvitambo                | Subgroup <sup>3</sup> | X        | X         | X       | X       | X       |
| Plasma      | Total PAMP activity (THP1 reporter cell line <sup>2</sup> )                                      | TROPGAN and Zvitambo                | Subgroup <sup>3</sup> | X        | X         | X       | X       | X       |
| Whole       | Molecular techniques                                                                             | QMUL, London <sup>2</sup>           | Subgroup <sup>3</sup> | X        | X         | X       | X       | X       |

|                                 |                                                                                                                            |                   |     |   |   |   |   |   |
|---------------------------------|----------------------------------------------------------------------------------------------------------------------------|-------------------|-----|---|---|---|---|---|
| blood                           | for bacterial detection (broad-range and specific PCR and next-generation sequencing)                                      |                   |     |   |   |   |   |   |
| <b>Immunology substudy only</b> |                                                                                                                            |                   |     |   |   |   |   |   |
| Whole blood                     | <i>In vitro</i> binding to bacterial products, cytokine expression and cellular responses to PAMP stimulation <sup>4</sup> | TROPGAN, Zvitambo | All | X | X | X | X | X |
| Plasma                          | Co-culture with healthy immune cells <sup>5</sup>                                                                          | QMUL, London      | All | X | X | X | X | X |

<sup>1</sup>If HIV test, CD4 and viral load have already been conducted as part of routine clinical care, they will not be repeated on the research sample.

<sup>2</sup>THP1 reporter cells are derived from THP1, a human monocytic cell line that naturally expresses many pattern recognition receptors (PRR). The cell line stably expresses an NF-κB/AP-1 inducible reporter (SEAP) system to facilitate the monitoring of PRR-induced NF-κB/AP-1 activation.

<sup>3</sup>Assays will be undertaken in a subgroup of children, using a case-control or case-cohort design to evaluate the impact of biomarkers on immune activation and mortality.

<sup>4</sup>Whole blood will be stimulated with pathogen-associated molecular patterns (PAMP) in culture plates and bacterial antigens labelled with fluorescent tags in test tubes, and incubated for 1-24hr. Supernatant will be removed and stored at -80C for subsequent analysis of pro- and anti-inflammatory cytokines, and cells will be fixed for subsequent analysis of bacterial binding, cellular activation, proliferation and cytokine elaboration by flow cytometry.

<sup>5</sup>To determine the effect of the systemic milieu on healthy immune cell function, plasma samples will be transported to the Blizzard Institute, QMUL and co-cultured with healthy immune cells, which will be functionally analysed via multi-parameter flow cytometry in the Flow Cytometry Core Facility.

IFABP: Intestinal fatty acid binding protein; ELISA: Enzyme-linked immunosorbent assay; GLP-2: glucagon-like peptide 2; sCD14: soluble CD14; sCD163: soluble CD163; PAMP: pathogen-associated molecular pattern; QMUL: Queen Mary University of London; CRP: C-reactive protein; LAL: limulus amoebocyte lysate assay.

Supplementary table 2: Additional laboratory analyses for enteropathy substudy

| Sample type   | Assay (method)                                                                                                         | Location of work        | Study groups <sup>1</sup>         | Baseline | Discharge | Week 12 | Week 24 | Week 48 |
|---------------|------------------------------------------------------------------------------------------------------------------------|-------------------------|-----------------------------------|----------|-----------|---------|---------|---------|
| Urine         | Lactulose-mannitol ratio (mass spectrometry)                                                                           | Orgeon Analytics, USA   | A, B, C, D (all)                  | X        | X         | X       |         | X       |
| Stool         | Neopterin, myeloperoxidase, alpha-1 antitrypsin and REG-1B (ELISA)                                                     | TROPGAN and Zvitambo    | A, B, C, D (all)                  | X        | X         | X       | X       | X       |
| Plasma        | I-FABP (ELISA)                                                                                                         | TROPGAN and Zvitambo    | A, B, C, D (all)                  | X        | X         | X       | X       | X       |
| Plasma        | GLP-2                                                                                                                  | TROPGAN and Zvitambo    | A, B, C, D (all)                  | X        | X         | X       | X       | X       |
| Plasma        | Citrulline (mass spectrometry)                                                                                         | Imperial College London | A, B, C, D (all)                  | X        | X         | X       | X       | X       |
| Plasma        | Kynurenine:tryptophan ratio and metabolites along tryptophan pathway (mass spectrometry)                               | Imperial College London | A, B, C, D (all)                  | X        | X         | X       | X       | X       |
| Stool         | Microbiome analysis <sup>2</sup>                                                                                       | BCCDC, Vancouver        | A, B, C, D (all)                  | X        | X         | X       | X       | X       |
| Stool         | <i>Helicobacter pylori</i> antigen                                                                                     | TROPGAN and Zvitambo    | A, B, C, D (all)                  | X        |           |         |         |         |
| Gastric juice | Culture and molecular techniques for bacterial detection (broad-range and specific PCR and next-generation sequencing) | QMUL, London            | Subgroup of A, C (n=50 per group) | X        |           |         |         |         |

|                                  |                                               |                         |                  |   |   |   |   |   |
|----------------------------------|-----------------------------------------------|-------------------------|------------------|---|---|---|---|---|
| RNA extracted from PAXGene tubes | Gene expression analysis (RNASeq)             | QMUL, London            | A, B, C, D (all) | X | X |   |   |   |
| Plasma and urine                 | Targeted and untargeted metabolic phenotyping | Imperial College London | A, B, C, D (all) | X | X | X | X | X |

<sup>1</sup>Enteropathy substudy groups: Group A: HIV-positive children with severe acute malnutrition; Group B: HIV-positive well-nourished controls; Group C: HIV-negative children with severe acute malnutrition; Group D: HIV-negative well-nourished controls.

Note that controls only have blood taken at baseline.

<sup>2</sup>For microbiome analyses, total DNA and/or RNA will be extracted from stool samples and used as template for next generation sequencing library preparation and for quantitative polymerase chain reaction (qPCR), then sequenced via whole metagenome shotgun sequencing

QMUL: Queen Mary University of London; BCCDC: British Columbia Centre for Disease Control.
